# Supplementary material for: Metal-free and site-selective α-C(sp 3 )–H oxidation of thioethers to access thioester derivatives
Source: Royal Society of Chemistry journal article supplement (doi:10.1039/d5nj05010c), 2026-01-01

# Electronic Supplementary Information

## Metal-free and site-selective $\alpha$ -C(sp<sup>3</sup>)-H oxidation of thioethers to access thioester derivatives

Dan Yuan<sup>a</sup>, Yong Huang<sup>a</sup>, Yongli He<sup>b</sup>, Xiaoqiang Sun<sup>a</sup>, Chunjian Qi<sup>c</sup>, Zhengyi Li<sup>a</sup> and Ke Yang<sup>a,\*</sup>

<sup>a</sup> *Jiangsu Key Laboratory of Advanced Catalytic Materials & Technology, School of Petrochemical Engineering, Changzhou University, 1 Gehu Road, Changzhou, Jiangsu 213164, China.*

<sup>b</sup> *School of Chemistry and Chemical Engineering, Nanjing University of Science and Technology, Nanjing, Jiangsu 210094, China.*

<sup>c</sup> *Medical Research Center, the Affiliated Changzhou No. 2 People's Hospital of Nanjing Medical University, Changzhou, 213003, China.*

### ***Table of contents***

|                                                         |     |
|---------------------------------------------------------|-----|
| I. General Information·····                             | S2  |
| II. Experimental Section·····                           | S3  |
| III. References and Notes·····                          | S24 |
| IV. <sup>1</sup> H and <sup>13</sup> C NMR Spectra····· | S26 |

## **I. General Information**

All the solvents and commercially available reagents were purchased and used directly. Thin layer chromatography (TLC) was performed on EMD precoated plates (silica gel 60 F254, Art 5715) and visualized by fluorescence quenching under UV light. Column chromatography was performed on EMD Silica Gel 60 (200–300 Mesh) using a forced flow of 0.5–1.0 bar. The  $^1\text{H}$  and  $^{13}\text{C}$  NMR spectra were obtained on a Bruker AVANCE III–300 or 400 spectrometer.  $^1\text{H}$  NMR data was reported as: chemical shift ( $\delta$  ppm), multiplicity, coupling constant (Hz), and integration.  $^{13}\text{C}$  NMR data was reported in terms of chemical shift ( $\delta$  ppm), multiplicity, and coupling constant (Hz). EI mass analysis was obtained using Shimadzu GCMS-QP2010plus. HRMS analysis was obtained using Agilent 6200 Accurate-Mass TOF LC/MS system with Electrospray Ionization (ESI). Melting points were measured by an X4-A microscopic melting point apparatus.

## II. Experimental Section

### 1. Starting materials:

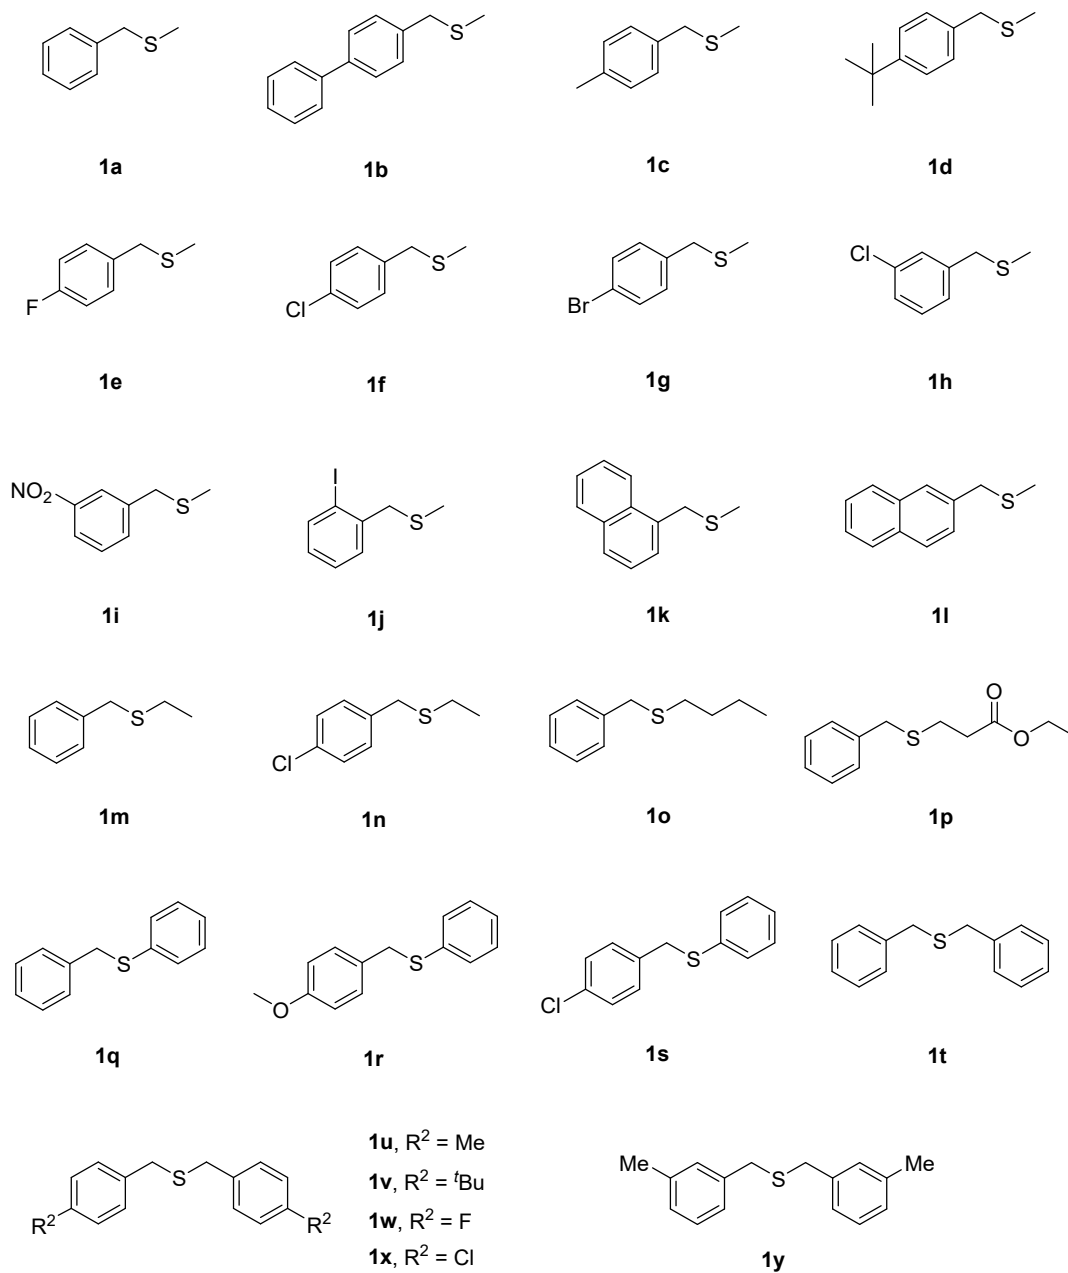

**Scheme S1.** Thioethers

Thioethers (**1a-y**) were purchased from Energy-chemical, BLDpharm, Chemieliva, Chemhere, Adamas-beta®, TCI, J&K® or Sigma-Aldrich.

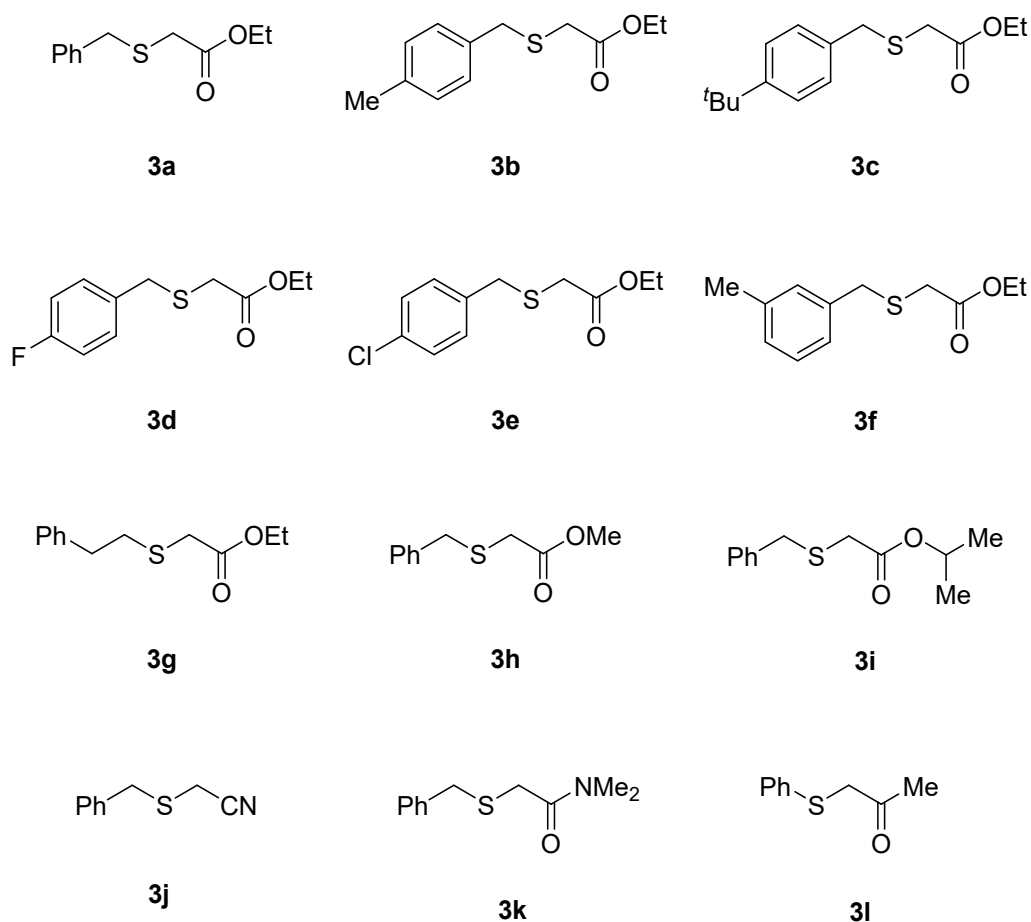

**Scheme S2.** Thioether ester, nitrile, amide, and ketone derivatives

Thioether ester, nitrile, amide, and ketone derivatives (**3a-l**) were purchased from Chemieliva, Enamine, Adamas-beta®, TCI, J&K® or Sigma-Aldrich.

## 2. Optimization of the reaction conditions for the product 2a

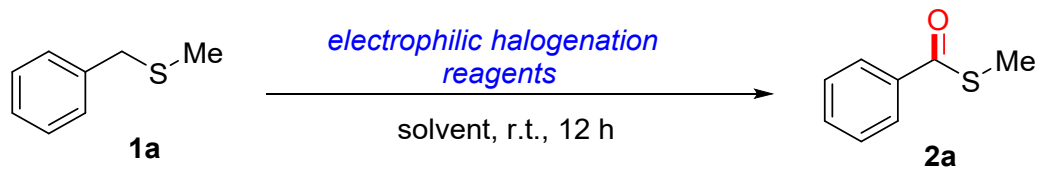

A 30 mL Schlenk tube was charged with benzyl methyl sulfide **1a** (0.2 mmol), solvent (2.0 mL) and electrophilic halogenation reagents (0.4 ~ 0.6 mmol). The tube was sealed and the reaction was then stirred vigorously at room temperature for 12 h. The reaction mixture was then concentrated *in vacuo*. The residue was purified by flash chromatography on silica gel to yield the desired product **2a**.

### 3. General procedure for the scope study

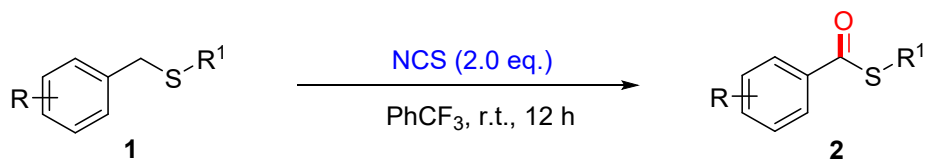

A 30 mL Schlenk tube was charged with thioesters **1** (0.2 mmol, 27.6 mg), PhCF<sub>3</sub> (2.0 mL) and NCS (0.4 mmol, 53.4 mg). The tube was sealed and the reaction was then stirred vigorously at room temperature for 12 h. The reaction mixture was then concentrated *in vacuo*. The residue was purified by flash chromatography on silica gel to yield the desired products **2**. *Caution! To prevent unpredictable variations in yields, the PhCF<sub>3</sub> used in this study was sourced from Adamas-beta®.*

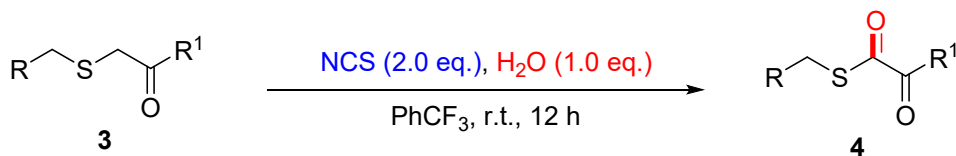

A 30 mL Schlenk tube was charged with oxalate thioethers **3** (0.2 mmol), PhCF<sub>3</sub> (2.0 mL), NCS (0.4 mmol, 53.4 mg) and H<sub>2</sub>O (0.2 mmol, 3.6 μL). The tube was sealed and the reaction was then stirred vigorously at room temperature for 12 h. The reaction mixture was then concentrated *in vacuo*. The residue was purified by flash chromatography on silica gel to yield the desired products **4**.

#### 4. The gram-scale reaction

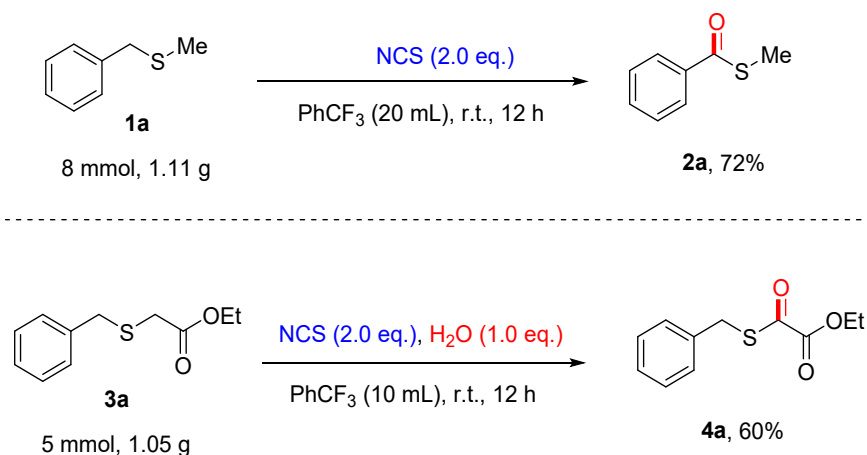

A 150 mL Schlenk tube was charged with benzyl methyl sulfide **1a** (8 mmol, 1.11 g), PhCF<sub>3</sub> (20.0 mL) and NCS (16 mmol, 2.14 g). The tube was sealed and the reaction was then stirred vigorously at room temperature for 12 h. After cooling to room temperature, the reaction mixture was then concentrated *in vacuo*. The residue was purified by flash chromatography on silica gel to yield the desired product **2a** (0.88 g, 72%).

A 150 mL Schlenk tube was charged with ethyl 2-(benzylthio)acetate **3a** (5 mmol, 1.05 g), PhCF<sub>3</sub> (10.0 mL), NCS (16 mmol, 2.14 g) and H<sub>2</sub>O (5 mmol, 90  $\mu$ L). The tube was sealed and the reaction was then stirred vigorously at room temperature for 12 h. The reaction mixture was then concentrated *in vacuo*. The residue was purified by flash chromatography on silica gel to yield the desired product **4a** (0.67 g, 60%).

#### 5. Mechanistic studies

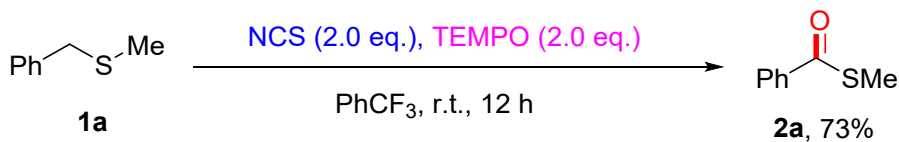

A 30 mL Schlenk tube was charged with benzyl methyl sulfide **1a** (0.2 mmol, 27.6 mg), PhCF<sub>3</sub> (2.0 mL), NCS (0.4 mmol, 53.4 mg) and TEMPO (0.4 mmol, 62.5 mg). The tube was sealed and the reaction was then stirred vigorously at room temperature for 12 h. After that, the reaction mixture was concentrated *in vacuo*. The residue was purified by flash

chromatography on silica gel to yield the desired product **2a** (22.2 mg, 73%).

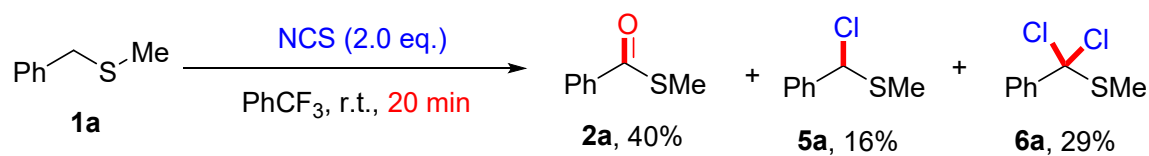

A 30 mL Schlenk tube was charged with benzyl methyl sulfide **1a** (0.2 mmol, 27.6 mg), PhCF<sub>3</sub> (2.0 mL) and NCS (0.4 mmol, 53.4 mg). The tube was sealed and the reaction was then stirred vigorously at room temperature for 20 min. After that, the reaction mixture was concentrated *in vacuo*, and the crude product was analyzed by <sup>1</sup>H NMR in CDCl<sub>3</sub> and GCMS in MeCN. Yields and conversions are based on **1a**, determined by crude <sup>1</sup>H NMR using dibromomethane as the internal standard.

**(a) NMR analysis of the crude product**

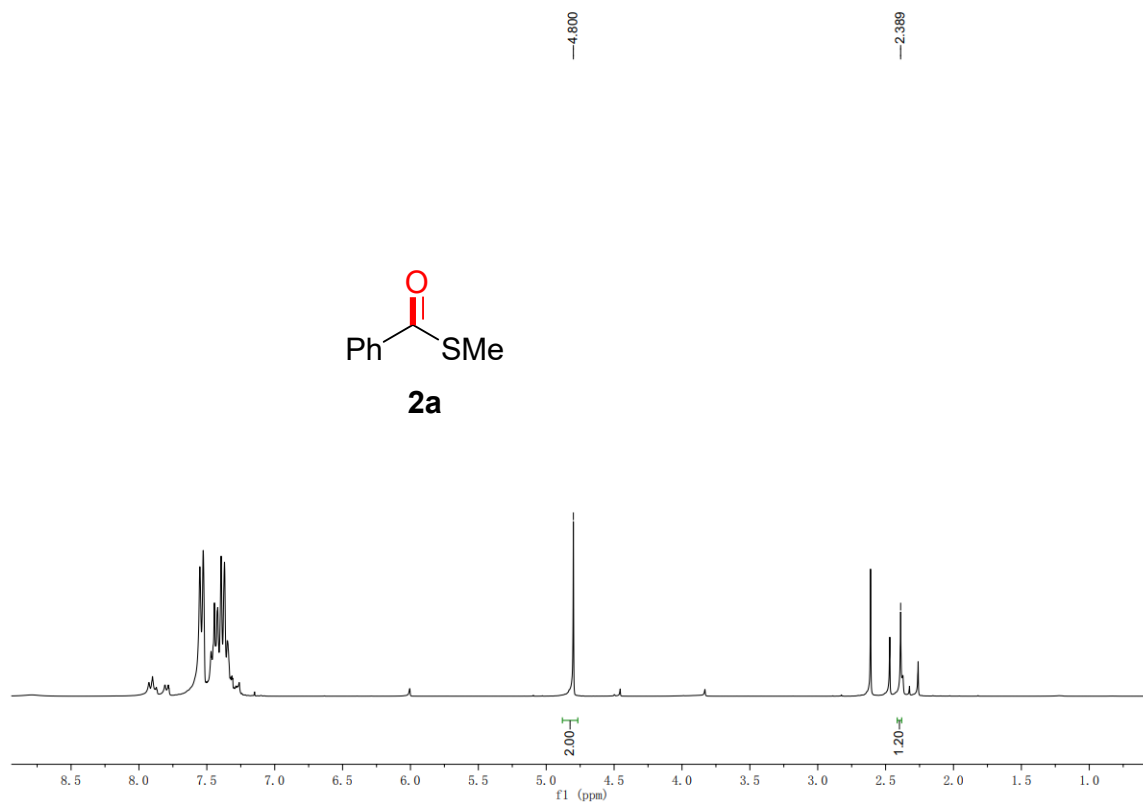

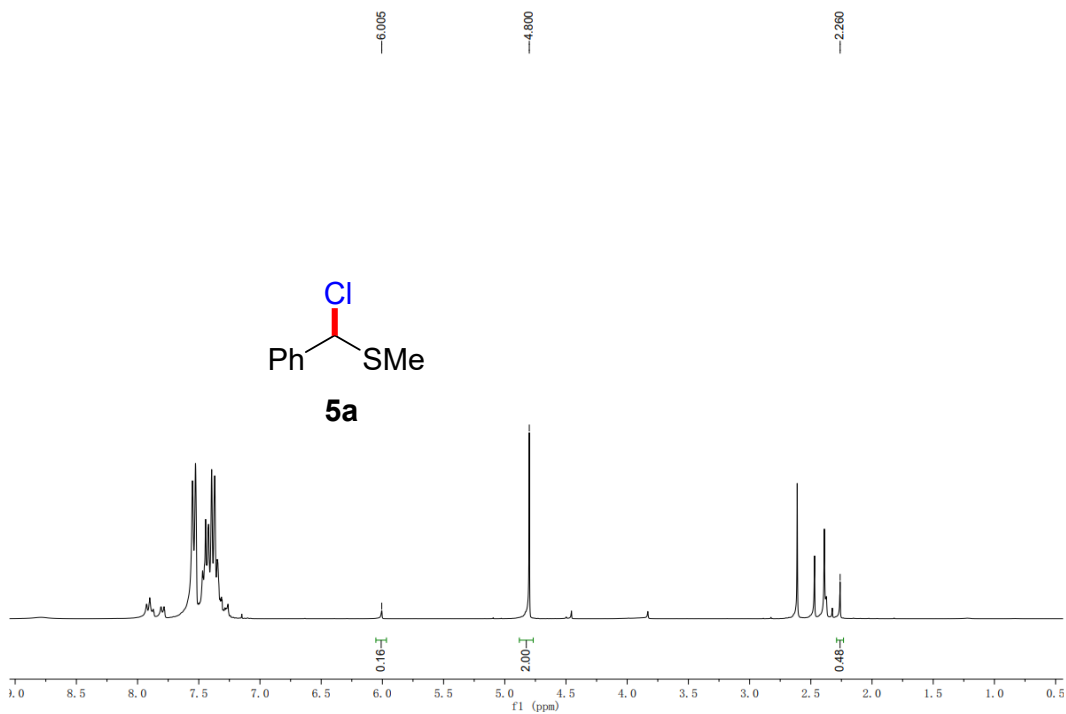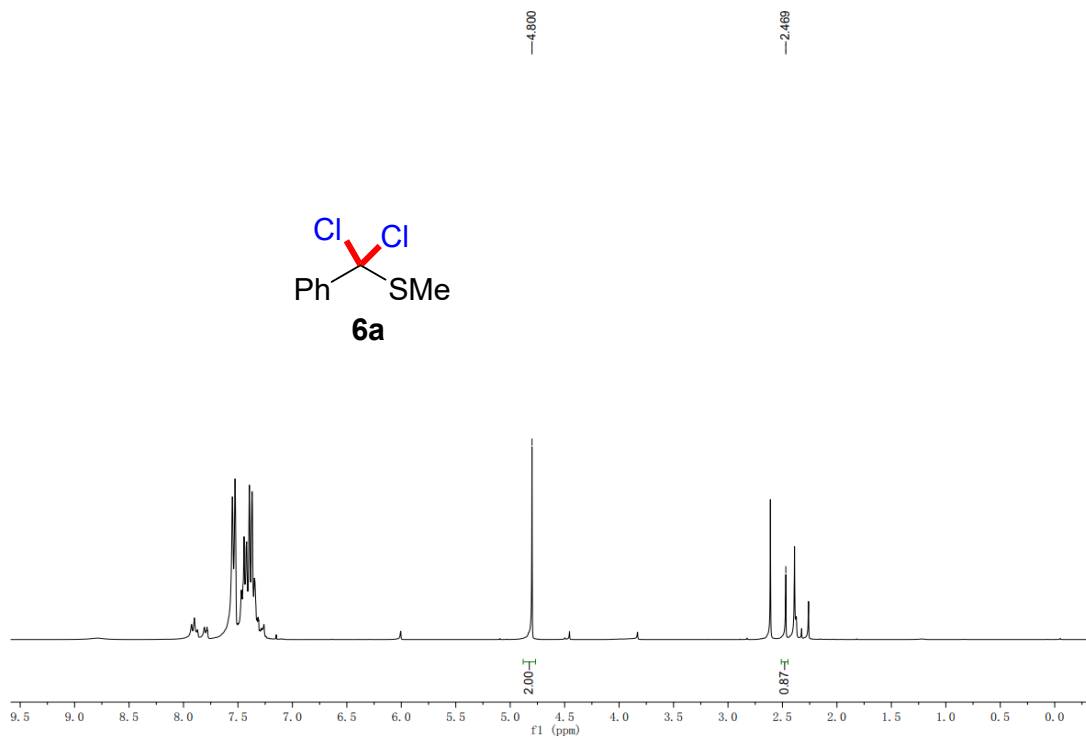



**(b) GC-MS analysis of the crude product**

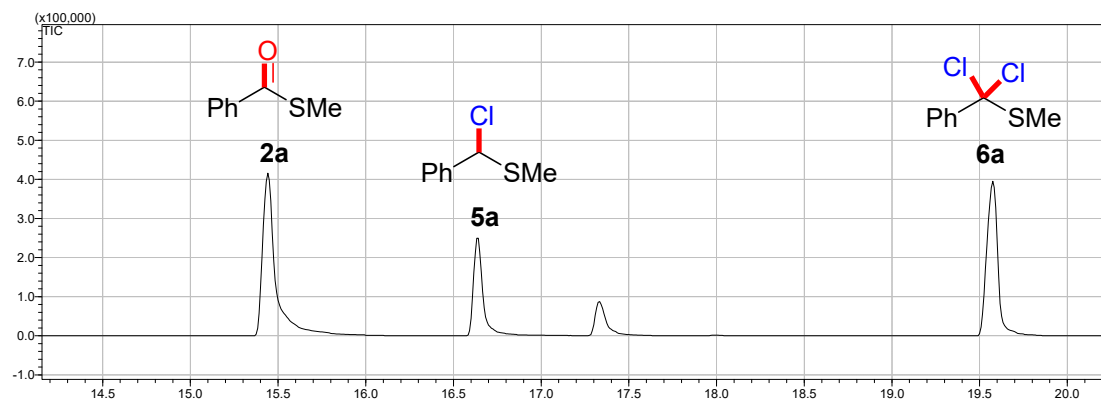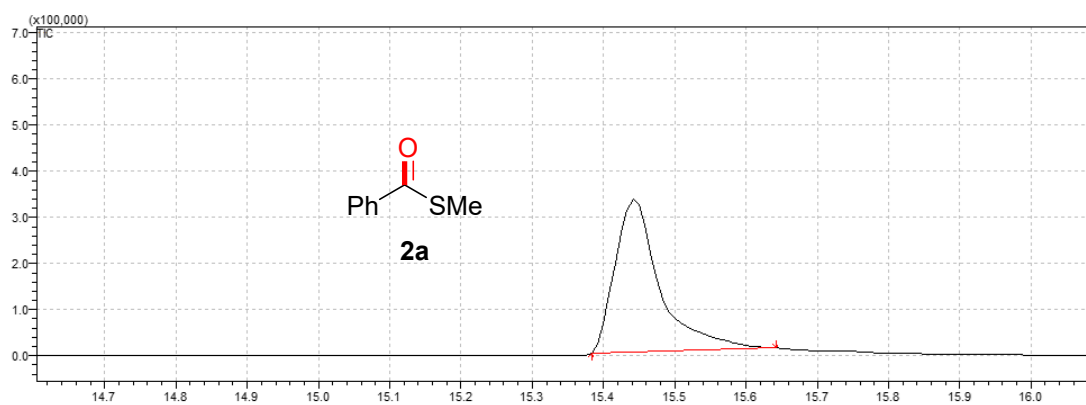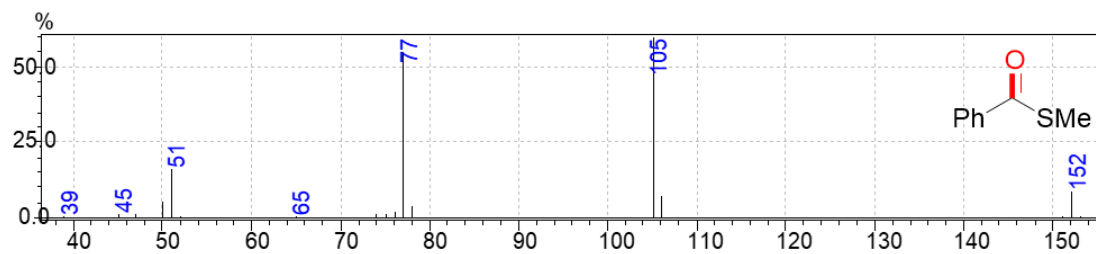

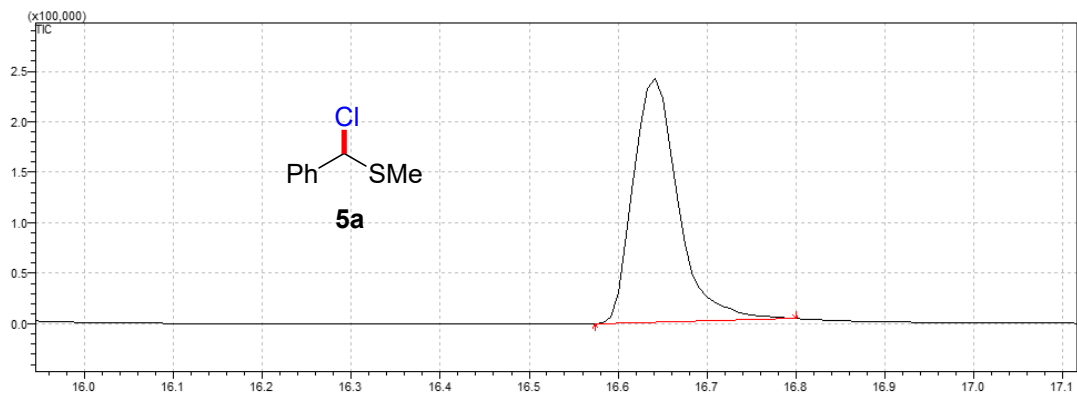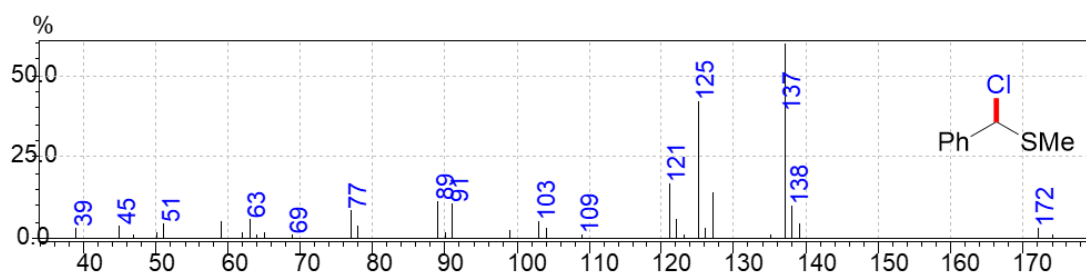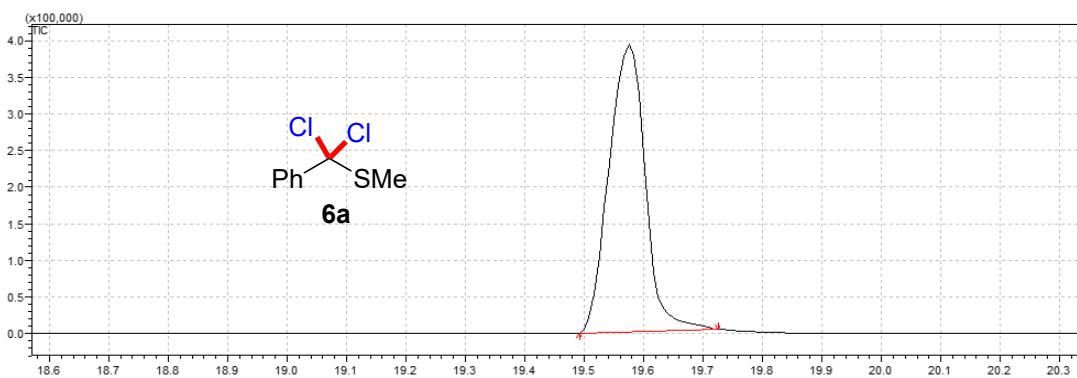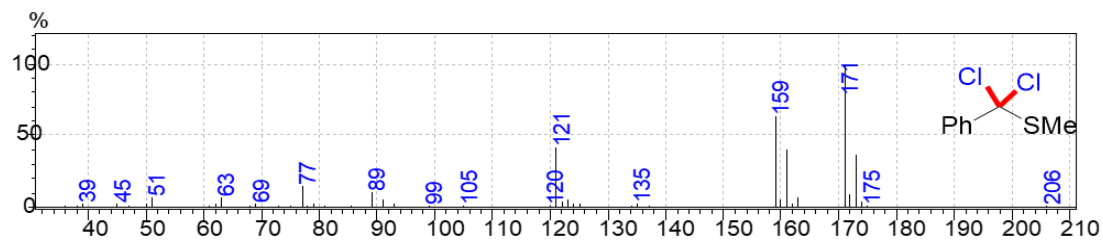

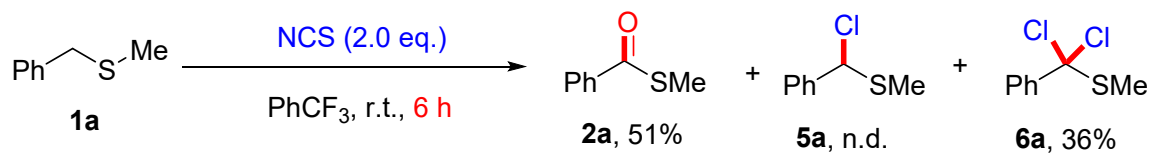

A 30 mL Schlenk tube was charged with benzyl methyl sulfide **1a** (0.2 mmol, 27.6 mg), PhCF<sub>3</sub> (2.0 mL) and NCS (0.4 mmol, 53.4 mg). The tube was sealed and the reaction was then stirred vigorously at room temperature for 6 h. After that, the reaction mixture was concentrated *in vacuo*, and the crude product was analyzed by <sup>1</sup>H NMR in CDCl<sub>3</sub>. Yields and conversions are based on **1a**, determined by crude <sup>1</sup>H NMR using dibromomethane as the internal standard.

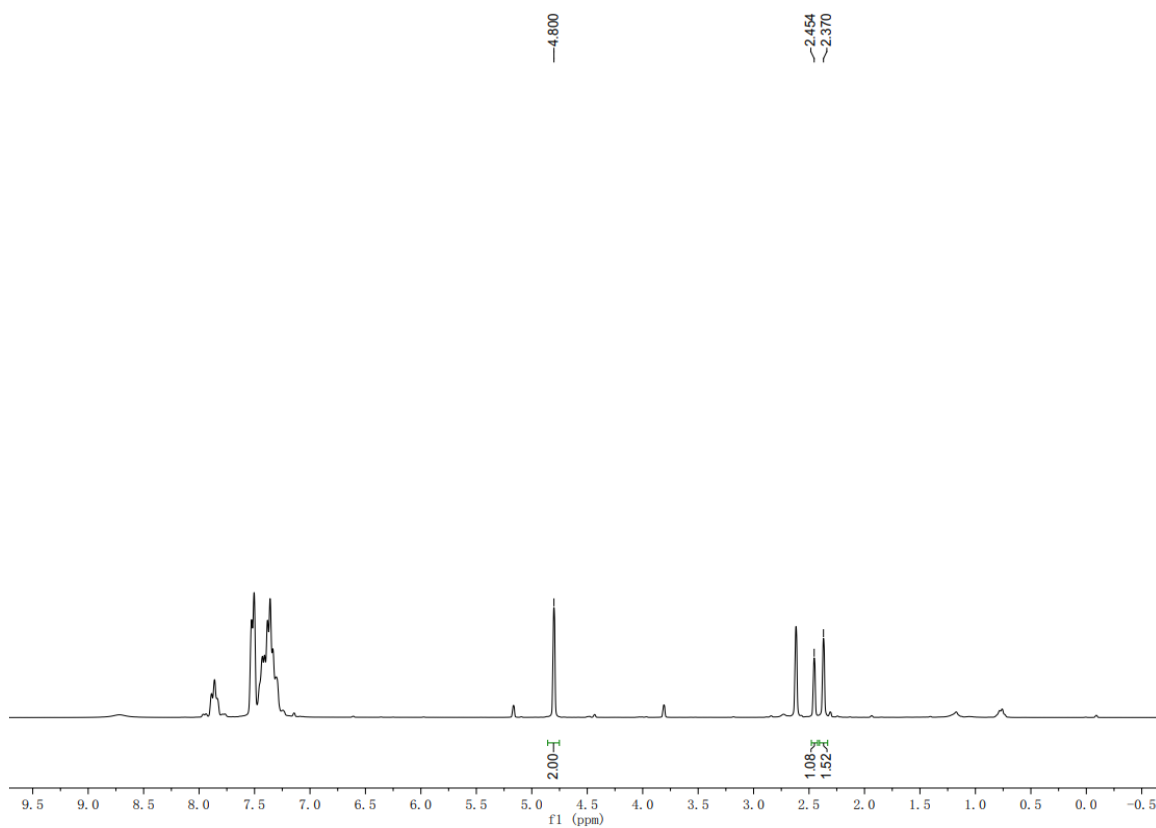

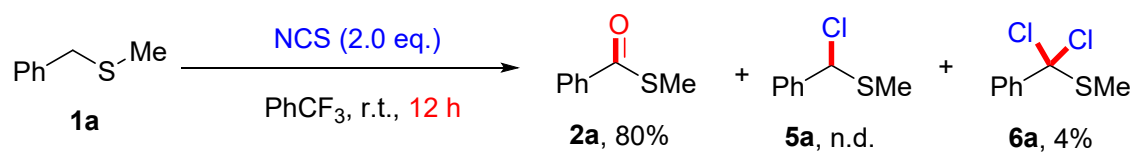

A 30 mL Schlenk tube was charged with benzyl methyl sulfide **1a** (0.2 mmol, 27.6 mg), PhCF<sub>3</sub> (2.0 mL) and NCS (0.4 mmol, 53.4 mg). The tube was sealed and the reaction was then stirred vigorously at room temperature for 12 h. After that, the reaction mixture was concentrated *in vacuo*, and the crude product was analyzed by <sup>1</sup>H NMR in CDCl<sub>3</sub>. Yields and conversions are based on **1a**, determined by crude <sup>1</sup>H NMR using dibromomethane as the internal standard.

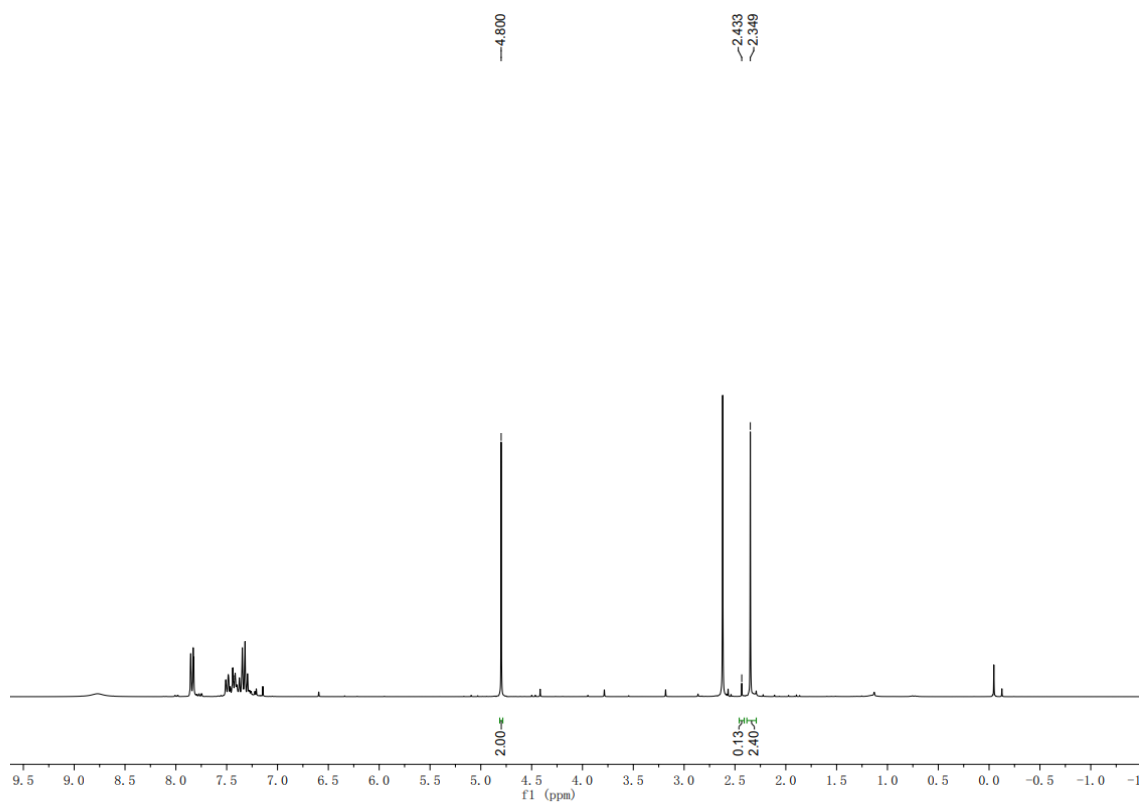

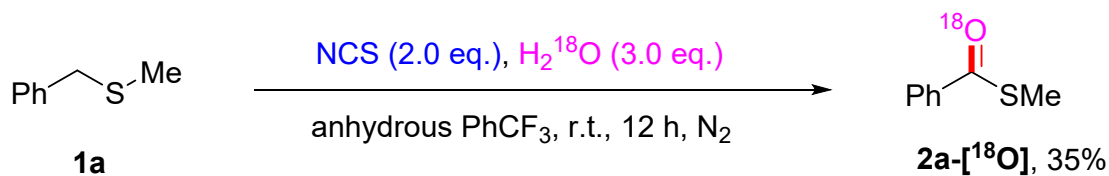

A 30 mL Schlenk tube was charged with benzyl methyl sulfide **1a** (0.2 mmol, 27.6 mg), anhydrous PhCF<sub>3</sub> (2.0 mL), NCS (0.4 mmol, 53.4 mg) and H<sub>2</sub><sup>18</sup>O (0.6 mmol, 10.8 μL) under N<sub>2</sub> atmosphere. The tube was sealed and the reaction was then stirred vigorously at room temperature for 12 h. The reaction mixture was then concentrated in vacuo. The residue was purified by flash chromatography on silica gel to yield the desired product **2a**-[<sup>18</sup>O] (10.8 mg, 35%). In addition, product **2a**-[<sup>18</sup>O] was confirmed by GC-MS.

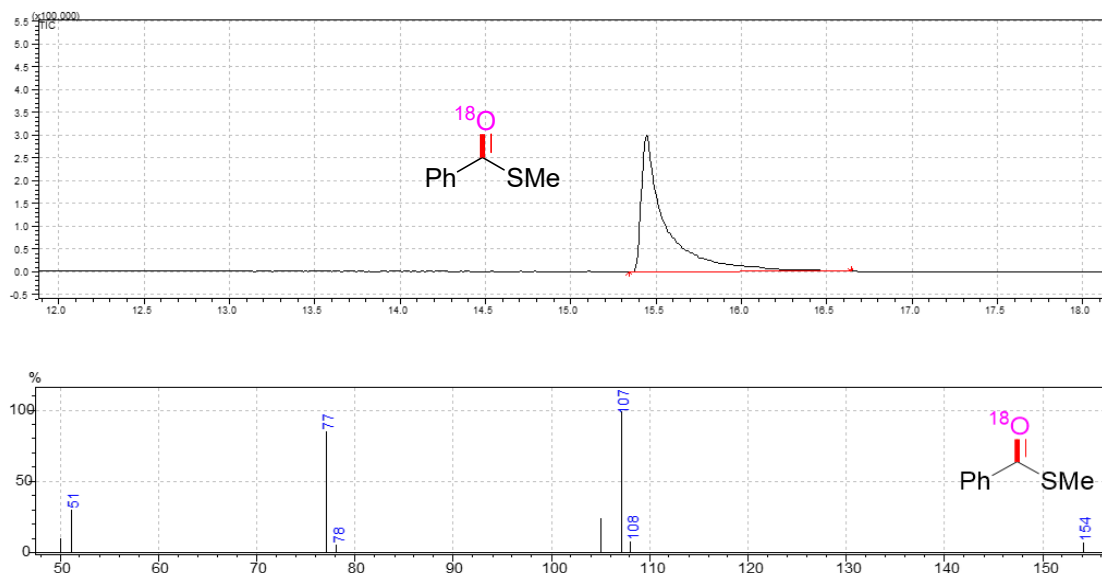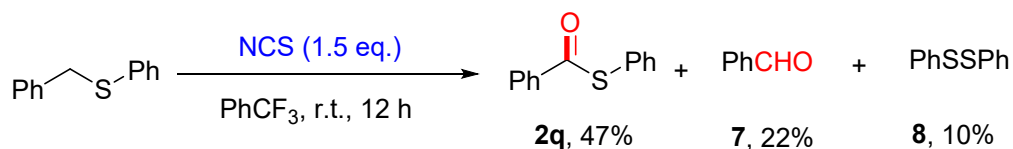

A 30 mL Schlenk tube was charged with benzyl methyl sulfide (0.2 mmol, 40.0 mg), PhCF<sub>3</sub> (2.0 mL), and NCS (0.3 mmol, 40.11 mg). The tube was sealed and the reaction was then stirred vigorously under the protection of nitrogen at room temperature for 12 h. The

reaction mixture was then concentrated *in vacuo*. The residue was purified by flash chromatography on silica gel to yield *S*-phenyl benzothioate **2q** (20.1 mg, 47%), benzaldehyde (4.7 mg, 22%) and diphenyl disulfide (4.4 mg, 10%).

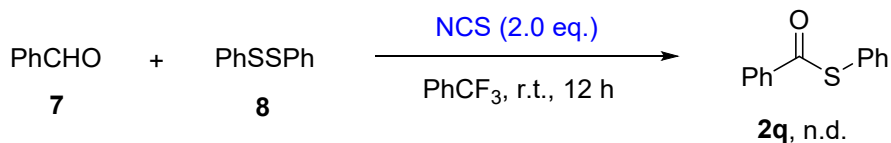

A 30 mL Schlenk tube was charged with benzaldehyde **7** (0.2 mmol), PhCF<sub>3</sub> (2.0 mL), diphenyl disulfide (0.1 mmol) and NCS (0.4 mmol). The tube was sealed and the reaction was then stirred vigorously under the protection of nitrogen at room temperature for 12 h. Monitor the reaction system through TLC, no desired product **2q** was detected. After that, the reaction mixture was concentrated *in vacuo*, and no product **2q** was found in GC-MS.

## 6. Data of compounds

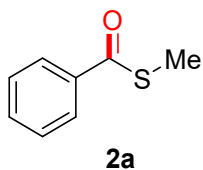

Colorless oil, 24.3 mg, yield: 80% (known compound<sup>1</sup>). <sup>1</sup>H NMR (300 MHz, CDCl<sub>3</sub>) δ 7.91 (d, *J* = 7.5 Hz, 2H), 7.42 (t, *J* = 6.6 Hz, 1H), 7.31 (t, *J* = 7.5 Hz, 2H), 2.35 (s, 3H). <sup>13</sup>C NMR (75 MHz, CDCl<sub>3</sub>) δ 192.51, 137.07, 133.30, 128.63, 127.15, 11.76.

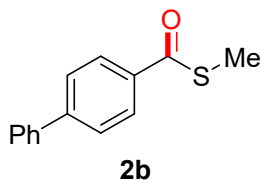

Colorless oil, 36.5 mg, yield: 80% (known compound<sup>1</sup>). <sup>1</sup>H NMR (300 MHz, CDCl<sub>3</sub>) δ 8.09 – 8.03 (m, 2H), 7.70 – 7.61 (m, 4H), 7.51 – 7.40 (m, 3H), 2.51 (s, 3H). <sup>13</sup>C NMR (75 MHz, CDCl<sub>3</sub>) δ 190.90, 144.95, 138.74, 134.71, 127.91, 127.20, 126.64, 126.20, 126.18, 10.69.

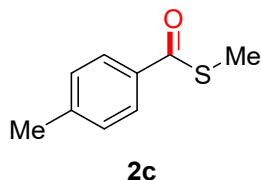

Colorless oil, 25.2 mg, yield: 76% (known compound<sup>1</sup>). <sup>1</sup>H NMR (300 MHz, CDCl<sub>3</sub>) δ 7.87 (d, *J* = 8.2 Hz, 2H), 7.25 (d, *J* = 8.7 Hz, 2H), 2.46 (s, 3H), 2.41 (s, 3H). <sup>13</sup>C NMR (75 MHz, CDCl<sub>3</sub>) δ 192.12, 144.12, 134.57, 129.27, 127.21, 21.68, 11.66.

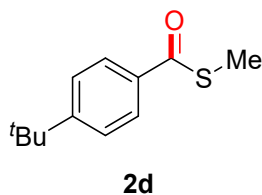

Colorless oil, 29.0 mg, yield: 70% (known compound<sup>1</sup>). <sup>1</sup>H NMR (300 MHz, CDCl<sub>3</sub>) δ 7.91 (d, *J* = 8.5 Hz, 2H), 7.46 (d, *J* = 8.5 Hz, 2H), 2.47 (s, 3H), 1.34 (s, 9H). <sup>13</sup>C NMR (75 MHz, CDCl<sub>3</sub>) δ 192.06, 157.05, 134.49, 127.06, 125.57, 35.16, 31.11, 11.65.

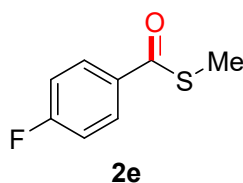

Colorless oil, 24.8 mg, yield: 73% (known compound<sup>2</sup>). <sup>1</sup>H NMR (300 MHz, CDCl<sub>3</sub>) δ 8.05 – 7.94 (m, 2H), 7.13 (t, *J* = 8.6 Hz, 2H), 2.48 (s, 3H). <sup>13</sup>C NMR (75 MHz, CDCl<sub>3</sub>) δ 191.00, 165.88 (d, *J* = 254.7 Hz), 133.42 (d, *J* = 3.0 Hz), 129.67 (d, *J* = 9.3 Hz), 115.76 (d, *J* = 22.1 Hz), 11.82.

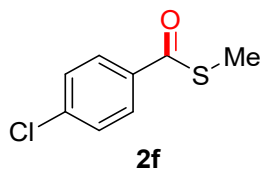

Colorless oil, 29.8 mg, yield: 80% (known compound<sup>1</sup>). <sup>1</sup>H NMR (300 MHz, CDCl<sub>3</sub>) δ 7.91 (d, *J* = 8.6 Hz, 2H), 7.43 (d, *J* = 8.6 Hz, 2H), 2.48 (s, 3H). <sup>13</sup>C NMR (75 MHz, CDCl<sub>3</sub>) δ 191.27, 139.66, 135.37, 128.93, 128.49, 11.81.



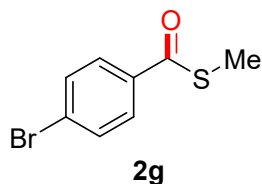

Colorless oil, 39.0 mg, yield: 85% (known compound<sup>1</sup>). <sup>1</sup>H NMR (300 MHz, CDCl<sub>3</sub>) δ 7.88 – 7.79 (m, 2H), 7.64 – 7.55 (m, 2H), 2.48 (s, 3H). <sup>13</sup>C NMR (75 MHz, CDCl<sub>3</sub>) δ 191.49, 135.80, 131.92, 128.61, 128.33, 11.82.

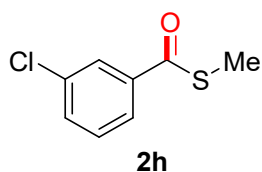

Colorless oil, 34.2 mg, yield: 92% (known compound<sup>3</sup>). <sup>1</sup>H NMR (300 MHz, CDCl<sub>3</sub>) δ 7.85 (t, *J* = 1.8 Hz, 1H), 7.77 (d, *J* = 7.8 Hz, 1H), 7.46 (d, *J* = 8.1 Hz, 1H), 7.47 – 7.29 (m, 1H), 2.41 (s, 3H). <sup>13</sup>C NMR (75 MHz, CDCl<sub>3</sub>) δ 191.30, 138.55, 134.91, 133.20, 129.95, 127.19, 125.29, 11.90.

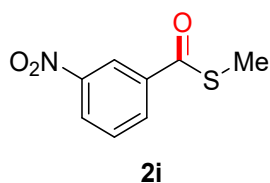

Colorless oil, 37.0 mg, yield: 94% (known compound<sup>4</sup>). <sup>1</sup>H NMR (300 MHz, CDCl<sub>3</sub>) δ 8.80 – 8.74 (m, 1H), 8.43 – 8.38 (m, 1H), 8.29 – 8.23 (m, 1H), 7.66 (t, *J* = 8.0 Hz, 1H), 2.53 (s, 3H). <sup>13</sup>C NMR (75 MHz, CDCl<sub>3</sub>) δ 190.40, 148.36, 138.27, 132.65, 129.92, 127.48, 122.10, 12.03.

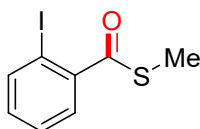

**2j**

Colorless oil, 33.4 mg, yield: 60%.  $^1\text{H}$  NMR (300 MHz,  $\text{CDCl}_3$ )  $\delta$  7.94 (dd,  $J = 7.9, 0.9$  Hz, 1H), 7.61 (dd,  $J = 7.7, 1.6$  Hz, 1H), 7.44 – 7.38 (m, 1H), 7.19 – 7.12 (m, 1H), 2.51 (s, 3H).  $^{13}\text{C}$  NMR (75 MHz,  $\text{CDCl}_3$ )  $\delta$  194.64, 142.74, 140.84, 132.32, 128.80, 128.00, 91.30, 12.80. HRMS (ESI,  $m/z$ ): calcd. for  $\text{C}_8\text{H}_8\text{IOS}$   $[\text{M}+\text{H}]^+$ : 278.9335, found: 278.9342.

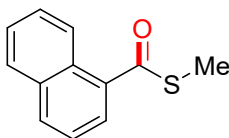

**2k**

Colorless oil, 33.2 mg, yield: 82% (known compound<sup>3</sup>).  $^1\text{H}$  NMR (300 MHz,  $\text{CDCl}_3$ )  $\delta$  8.45 – 8.39 (m, 1H), 7.96 – 7.88 (m, 2H), 7.80 – 7.76 (m, 1H), 7.53 – 7.43 (m, 2H), 7.41 (d,  $J = 7.4$  Hz, 1H), 2.46 (s, 3H).  $^{13}\text{C}$  NMR (75 MHz,  $\text{CDCl}_3$ )  $\delta$  193.76, 134.52, 132.70, 131.71, 128.12, 127.26, 126.87, 126.50, 125.57, 124.22, 123.43, 11.66.

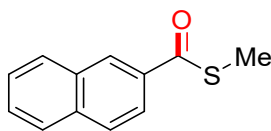

**2l**

Colorless oil, 33.5 mg, yield: 83% (known compound<sup>4</sup>).  $^1\text{H}$  NMR (300 MHz,  $\text{CDCl}_3$ )  $\delta$  8.53 (s, 1H), 8.03 – 7.94 (m, 2H), 7.90 – 7.83 (m, 2H), 7.62 – 7.51 (m, 2H), 2.54 (s, 3H).  $^{13}\text{C}$  NMR (75 MHz,  $\text{CDCl}_3$ )  $\delta$  192.39, 135.75, 134.37, 132.48, 129.59, 128.50, 128.48, 128.44, 127.83, 126.92, 123.15, 11.90.

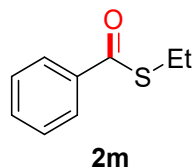

Colorless oil, 28.2 mg, yield: 85% (known compound<sup>4</sup>). <sup>1</sup>H NMR (300 MHz, CDCl<sub>3</sub>) δ 8.00 – 7.91 (m, 2H), 7.57 (t, *J* = 7.4 Hz, 1H), 7.45 (t, *J* = 7.6 Hz, 2H), 3.08 (q, *J* = 7.4 Hz, 2H), 1.36 (t, *J* = 7.4 Hz, 3H). <sup>13</sup>C NMR (75 MHz, CDCl<sub>3</sub>) δ 192.17, 137.23, 133.27, 128.60, 127.18, 23.47, 14.81.

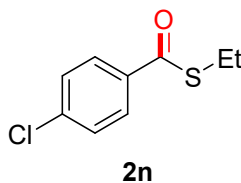

Colorless oil, 35.2 mg, yield: 88% (known compound<sup>5</sup>). <sup>1</sup>H NMR (300 MHz, CDCl<sub>3</sub>) δ 7.94 – 7.86 (m, 2H), 7.46 – 7.39 (m, 2H), 3.08 (q, *J* = 7.4 Hz, 2H), 1.35 (t, *J* = 7.4 Hz, 3H). <sup>13</sup>C NMR (75 MHz, CDCl<sub>3</sub>) δ 190.97, 139.61, 135.55, 128.89, 128.53, 23.62, 14.74.

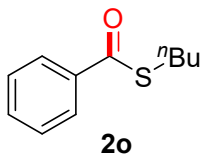

Colorless oil, 27.2 mg, yield: 70% (known compound<sup>6</sup>). <sup>1</sup>H NMR (300 MHz, CDCl<sub>3</sub>) δ 7.93 – 7.85 (m, 2H), 7.50 – 7.44 (m, 1H), 7.35 (t, *J* = 7.5 Hz, 2H), 3.00 (t, *J* = 7.3 Hz, 2H), 1.57 (q, *J* = 7.5 Hz, 2H), 1.42 – 1.34 (m, 2H), 0.87 (t, *J* = 7.3 Hz, 3H). <sup>13</sup>C NMR (75 MHz, CDCl<sub>3</sub>) δ 192.15, 137.31, 133.19, 128.56, 127.18, 31.64, 28.76, 22.07, 13.63.

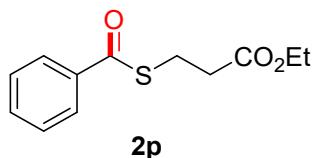

Colorless oil, 33.8 mg, yield: 71% (known compound<sup>7</sup>). <sup>1</sup>H NMR (300 MHz, CDCl<sub>3</sub>) δ 8.00 – 7.92 (m, 2H), 7.61 – 7.54 (m, 1H), 7.50 – 7.39 (m, 2H), 4.17 (q, *J* = 7.1 Hz, 2H), 3.32 (t, *J* = 7.0 Hz, 2H), 2.73 (t, *J* = 7.0 Hz, 2H), 1.27 (t, *J* = 7.1 Hz, 3H). <sup>13</sup>C NMR (75 MHz, CDCl<sub>3</sub>) δ 191.56, 171.75, 136.84, 133.50, 128.64, 127.24, 60.81, 34.51, 24.06, 14.22.

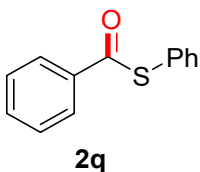

Colorless oil, 35.6 mg, yield: 83% (known compound<sup>8</sup>). <sup>1</sup>H NMR (300 MHz, CDCl<sub>3</sub>) δ 7.99 – 7.92 (m, 2H), 7.54 – 7.49 (m, 1H), 7.46 – 7.34 (m, 7H). <sup>13</sup>C NMR (75 MHz, CDCl<sub>3</sub>) δ 190.16, 136.70, 135.13, 133.69, 129.55, 129.28, 128.79, 127.52, 127.41.

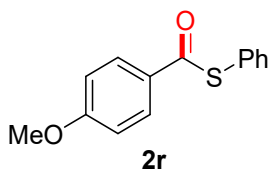

Colorless oil, 37.6 mg, yield: 77% (known compound<sup>8</sup>). <sup>1</sup>H NMR (300 MHz, CDCl<sub>3</sub>) δ 7.94 (dd, *J* = 8.2, 1.4 Hz, 2H), 7.55 – 7.47 (m, 1H), 7.42 – 7.30 (m, 4H), 6.90 (d, *J* = 8.7 Hz, 2H), 3.76 (s, 3H). <sup>13</sup>C NMR (75 MHz, CDCl<sub>3</sub>) δ 191.07, 160.83, 136.70, 136.66, 133.59, 128.75, 127.48, 117.93, 115.01, 55.41.

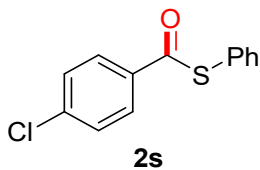

Colorless oil, 37.7 mg, yield: 76% (known compound<sup>8</sup>). <sup>1</sup>H NMR (300 MHz, CDCl<sub>3</sub>) δ 8.03 – 7.99 (m, 2H), 7.65 – 7.60 (m, 1H), 7.53 – 7.47 (m, 2H), 7.44 (brs, 4H). <sup>13</sup>C NMR (75 MHz, CDCl<sub>3</sub>) δ 189.67, 136.38, 136.33, 136.02, 133.89, 129.53, 128.84, 127.54, 125.86.

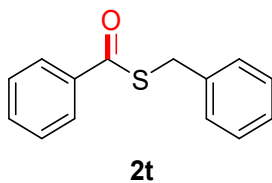

Colorless oil, 41.0 mg, yield: 90% (known compound<sup>1</sup>). <sup>1</sup>H NMR (300 MHz, CDCl<sub>3</sub>) δ 7.89 (d, *J* = 7.4 Hz, 2H), 7.49 (t, *J* = 7.4 Hz, 1H), 7.38 – 7.17 (m, 7H), 4.25 (s, 2H). <sup>13</sup>C NMR (75 MHz, CDCl<sub>3</sub>) δ 190.27, 136.44, 135.75, 132.42, 127.95, 127.62, 127.60, 126.30, 126.27, 32.30.

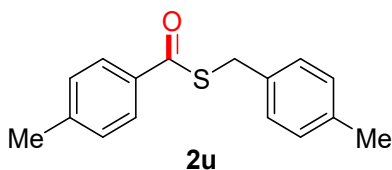

Colorless oil, 45.0 mg, yield: 88%. <sup>1</sup>H NMR (300 MHz, CDCl<sub>3</sub>) δ 7.85 (d, *J* = 8.3 Hz, 2H), 7.24 (dd, *J* = 12.0, 8.2 Hz, 4H), 7.11 (d, *J* = 7.9 Hz, 2H), 4.27 (s, 2H), 2.39 (s, 3H), 2.31 (s, 3H). <sup>13</sup>C NMR (75 MHz, CDCl<sub>3</sub>) δ 191.08, 144.29, 137.02, 134.55, 134.34, 129.36, 129.30, 128.91, 127.39, 33.04, 21.72, 21.16. HRMS (ESI, *m/z*): calcd. for C<sub>16</sub>H<sub>17</sub>OS [M+H]<sup>+</sup>: 257.0995, found: 257.1000.

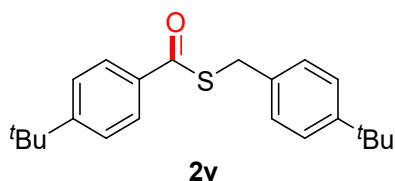

White solid, 56.5 mg, yield: 83%. m.p. = 54 ~ 55 °C.  $^1\text{H}$  NMR (300 MHz,  $\text{CDCl}_3$ )  $\delta$  7.91 (d,  $J$  = 8.6 Hz, 2H), 7.45 (d,  $J$  = 8.6 Hz, 2H), 7.35 – 7.28 (m, 4H), 4.29 (s, 2H), 1.31 (d,  $J$  = 7.8 Hz, 18H).  $^{13}\text{C}$  NMR (75 MHz,  $\text{CDCl}_3$ )  $\delta$  191.07, 157.24, 150.23, 134.49, 134.27, 128.68, 127.24, 125.59, 35.19, 34.52, 32.90, 31.35, 31.10. HRMS (ESI,  $m/z$ ): calcd. for  $\text{C}_{22}\text{H}_{29}\text{OS}$   $[\text{M}+\text{H}]^+$ : 341.1934, found: 341.1933.

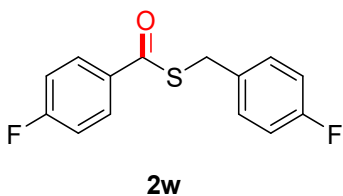

Colorless oil, 42.2 mg, yield: 80%.  $^1\text{H}$  NMR (300 MHz,  $\text{CDCl}_3$ )  $\delta$  8.01 – 7.96 (m, 2H), 7.37 – 7.32 (m, 2H), 7.15 – 7.09 (m, 2H), 7.03 – 6.97 (m, 2H), 4.28 (s, 2H).  $^{13}\text{C}$  NMR (75 MHz,  $\text{CDCl}_3$ )  $\delta$  189.69, 166.01 (d,  $J$  = 255.3 Hz), 162.08 (d,  $J$  = 246.1 Hz), 133.22 (d,  $J$  = 3.3 Hz), 133.04 (d,  $J$  = 3.1 Hz), 130.61 (d,  $J$  = 8.1 Hz), 129.88 (d,  $J$  = 9.4 Hz), 115.85 (d,  $J$  = 22.4 Hz), 115.56 (d,  $J$  = 21.8 Hz), 32.68. HRMS (ESI,  $m/z$ ): calcd. for  $\text{C}_{14}\text{H}_{10}\text{F}_2\text{NaOS}$   $[\text{M}+\text{Na}]^+$ : 287.0313, found: 287.0313.

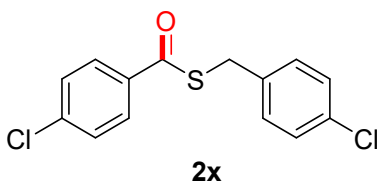

Colorless oil, 51.0 mg, yield: 86% (known compound<sup>9</sup>). <sup>1</sup>H NMR (300 MHz, CDCl<sub>3</sub>) δ 7.90 – 7.86 (m, 2H), 7.43 – 7.38 (m, 2H), 7.32 – 7.25 (m, 4H), 4.26 (s, 2H). <sup>13</sup>C NMR (75 MHz, CDCl<sub>3</sub>) δ 189.87, 140.02, 135.93, 134.97, 133.30, 130.35, 129.02, 128.84, 128.67, 32.75.

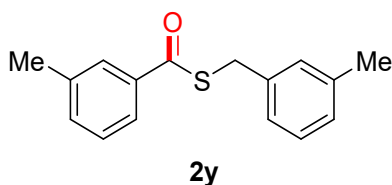

Colorless oil, 42.0 mg, yield: 82%. <sup>1</sup>H NMR (300 MHz, CDCl<sub>3</sub>) δ 7.77 (d, *J* = 6.4 Hz, 2H), 7.39 – 7.29 (m, 2H), 7.19 (d, *J* = 6.9 Hz, 3H), 7.06 (d, *J* = 6.8 Hz, 1H), 4.28 (s, 2H), 2.39 (s, 3H), 2.33 (s, 3H). <sup>13</sup>C NMR (75 MHz, CDCl<sub>3</sub>) δ 191.53, 138.53, 138.38, 137.42, 136.86, 134.23, 129.71, 128.59, 128.54, 128.14, 127.82, 126.04, 124.55, 33.32, 21.40, 21.34. HRMS (ESI, *m/z*): calcd. for C<sub>16</sub>H<sub>17</sub>OS [M+H]<sup>+</sup>: 257.0995, found: 257.0998.

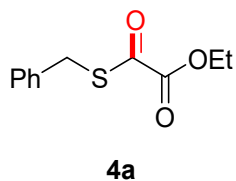

Colorless oil, 31.4 mg, yield: 70% (known compound<sup>10</sup>). <sup>1</sup>H NMR (300 MHz, CDCl<sub>3</sub>) δ 7.32 – 7.26 (m, 5H), 4.36 (q, *J* = 7.2 Hz, 2H), 4.20 (s, 2H), 1.37 (t, *J* = 7.2 Hz, 3H). <sup>13</sup>C NMR (75 MHz, CDCl<sub>3</sub>) δ 185.06, 158.95, 136.05, 129.05, 128.80, 127.74, 63.66, 33.71, 13.99.

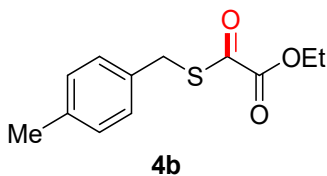

Colorless oil, 36.2 mg, yield: 76%.  $^1\text{H}$  NMR (300 MHz,  $\text{CDCl}_3$ )  $\delta$  7.22 (d,  $J = 7.5$  Hz, 2H), 7.12 (d,  $J = 7.8$  Hz, 2H), 4.36 (q,  $J = 6.8$  Hz, 2H), 4.18 (s, 2H), 2.33 (s, 3H), 1.38 (t,  $J = 7.0$  Hz, 3H).  $^{13}\text{C}$  NMR (75 MHz,  $\text{CDCl}_3$ )  $\delta$  185.14, 158.99, 137.53, 132.94, 129.47, 128.94, 63.60, 33.50, 21.15, 13.98. HRMS (ESI,  $m/z$ ): calcd. for  $\text{C}_{12}\text{H}_{15}\text{O}_3\text{S}$   $[\text{M}+\text{H}]^+$ : 239.0736, found: 239.0736.

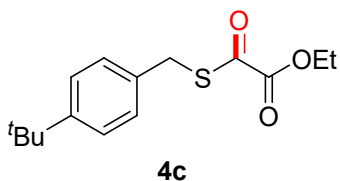

Colorless oil, 44.8 mg, yield: 80%.  $^1\text{H}$  NMR (300 MHz,  $\text{CDCl}_3$ )  $\delta$  7.33 (d,  $J = 8.3$  Hz, 2H), 7.25 (d,  $J = 8.3$  Hz, 2H), 4.36 (q,  $J = 7.1$  Hz, 2H), 4.19 (s, 2H), 1.38 (t,  $J = 7.1$  Hz, 3H), 1.30 (s, 9H).  $^{13}\text{C}$  NMR (75 MHz,  $\text{CDCl}_3$ )  $\delta$  185.15, 158.99, 150.76, 132.89, 128.73, 125.74, 63.61, 34.56, 33.37, 31.31, 13.99. HRMS (ESI,  $m/z$ ): calcd. for  $\text{C}_{15}\text{H}_{20}\text{NaO}_3\text{S}$   $[\text{M}+\text{Na}]^+$ : 303.1025, found: 303.1024.

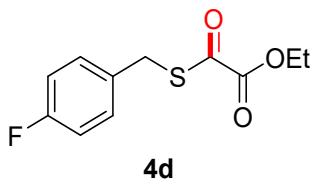

Colorless oil, 37.8 mg, yield: 78%.  $^1\text{H}$  NMR (300 MHz,  $\text{CDCl}_3$ )  $\delta$  7.21 (t,  $J = 6.9$  Hz, 2H), 6.91 (t,  $J = 8.6$  Hz, 2H), 4.29 (q,  $J = 7.1$  Hz, 2H), 4.09 (s, 2H), 1.30 (t,  $J = 7.1$  Hz, 3H).  $^{13}\text{C}$  NMR (75 MHz,  $\text{CDCl}_3$ )  $\delta$  184.96, 162.24 (d,  $J = 246.6$  Hz), 158.87, 131.97, 130.71 (d,  $J$



= 8.2 Hz), 115.66 (d,  $J = 21.7$  Hz), 63.69, 32.92, 13.95. HRMS (ESI,  $m/z$ ): calcd. for  $C_{11}H_{11}FNaO_3S$   $[M+Na]^+$ : 265.0305, found: 265.0300.

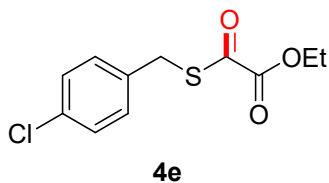

White solid, 42.3 mg, yield: 82%. m.p. = 48 ~ 49 °C.  $^1H$  NMR (300 MHz,  $CDCl_3$ )  $\delta$  7.27 (brs, 4H), 4.37 (q,  $J = 7.1$  Hz, 2H), 4.16 (s, 2H), 1.38 (t,  $J = 7.1$  Hz, 3H).  $^{13}C$  NMR (75 MHz,  $CDCl_3$ )  $\delta$  184.90, 158.83, 134.72, 133.62, 130.39, 128.92, 63.74, 32.97, 13.96. HRMS (ESI,  $m/z$ ): calcd. for  $C_{11}H_{11}ClNaO_3S$   $[M+Na]^+$ : 281.0010, found: 281.0010.

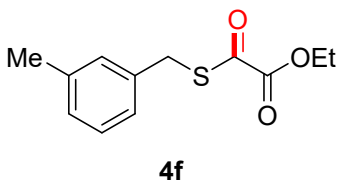

Colorless oil, 35.7 mg, yield: 75%.  $^1H$  NMR (300 MHz,  $CDCl_3$ )  $\delta$  7.20 (t,  $J = 7.4$  Hz, 1H), 7.16 – 7.05 (m, 3H), 4.36 (q,  $J = 7.2$  Hz, 2H), 4.17 (s, 2H), 2.33 (s, 3H), 1.38 (t,  $J = 7.1$  Hz, 3H).  $^{13}C$  NMR (75 MHz,  $CDCl_3$ )  $\delta$  185.07, 158.97, 138.54, 135.89, 129.73, 128.68, 128.51, 126.05, 63.61, 33.68, 21.33, 13.97. HRMS (ESI,  $m/z$ ): calcd. for  $C_{12}H_{15}O_3S$   $[M+H]^+$ : 239.0736, found: 239.0734.

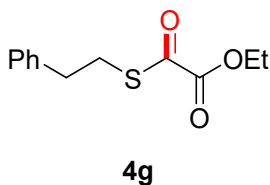

Colorless oil, 40.5 mg, yield: 85%.  $^1\text{H}$  NMR (300 MHz,  $\text{CDCl}_3$ )  $\delta$  7.30 (d,  $J = 6.8$  Hz, 2H), 7.24 (t,  $J = 5.4$  Hz, 3H), 4.37 (q,  $J = 7.1$  Hz, 2H), 3.27 – 3.17 (m, 2H), 2.97 – 2.86 (m, 2H), 1.39 (t,  $J = 7.1$  Hz, 3H).  $^{13}\text{C}$  NMR (75 MHz,  $\text{CDCl}_3$ )  $\delta$  185.61, 159.05, 139.38, 128.67, 128.59, 126.79, 63.58, 35.05, 30.74, 14.00. HRMS (ESI,  $m/z$ ): calcd. for  $\text{C}_{12}\text{H}_{15}\text{O}_3\text{S}$   $[\text{M}+\text{H}]^+$ : 239.0736, found: 239.0732.

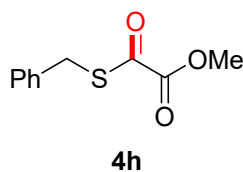

Colorless oil, 29.8 mg, yield: 71% (known compound<sup>11</sup>).  $^1\text{H}$  NMR (300 MHz,  $\text{CDCl}_3$ )  $\delta$  7.33 – 7.26 (m, 5H), 4.22 (s, 2H), 3.91 (s, 3H).  $^{13}\text{C}$  NMR (75 MHz,  $\text{CDCl}_3$ )  $\delta$  184.65, 159.42, 135.92, 129.03, 128.81, 127.78, 53.88, 33.74.

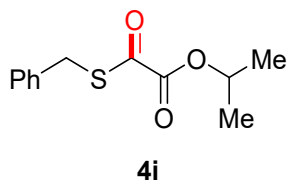

Colorless oil, 32.0 mg, yield: 67%.  $^1\text{H}$  NMR (300 MHz,  $\text{CDCl}_3$ )  $\delta$  7.36 – 7.24 (m, 5H), 5.22 – 5.08 (m, 1H), 4.19 (s, 2H), 1.35 (d,  $J = 6.3$  Hz, 6H).  $^{13}\text{C}$  NMR (75 MHz,  $\text{CDCl}_3$ )  $\delta$  185.38, 158.46, 136.16, 129.06, 128.79, 127.71, 72.21, 33.70, 21.55. HRMS (ESI,  $m/z$ ): calcd. for  $\text{C}_{12}\text{H}_{15}\text{O}_3\text{S}$   $[\text{M}+\text{H}]^+$ : 239.0736, found: 239.0736.

### III. References and notes:

- (1) Q. Tian, S. Xu, C. Zhang, X. Liu, X. Wu, Y. Li. Palladium catalyzed direct carbonylative thiomethylation of aryldiazonium salts and amines with 4-(methylthio)-2-butanone as (methylthio) transfer agent. *J. Org. Chem.*, **2021**, *86*, 8797-8804.
- (2) V. Kumar, A. Rana, C. L. Meena, N. Sharma, Y. Kumar, D. Mahajan. Electrophilic activation of carboxylic anhydrides for nucleophilic acylation reactions. *Synthesis* **2018**, *50*, 3902-3910.
- (3) A. K. Sharma, S. Ram Sheetal, P. Mehara, A. S. Chauhan, P. Das. Supported palladium-gold catalyzed carbonylative methylthioesterification of aryl iodides using oxalic acid and DMSO as CO and CH<sub>3</sub>SH surrogates. *Asian J. Org. Chem.* **2020**, *9*, 2099-2102.
- (4) D. Huang, H. Liu, E. Wang, M. Peng, T. Deng, M. Gao, S. Liu, Q. Li, L. Yang, X. Yang. KF-catalyzed direct thiomethylation of carboxylic acids with DMSO to access methyl thioesters. *Org. Biomol. Chem.* **2024**, *22*, 1453-1457.
- (5) V. J. Geiger, G. Lefèvre, I. Fleischer. Iron-catalyzed cross-coupling of thioesters and organomanganese reagents. *Chem. Eur. J.* **2022**, *28*, e202202212.
- (6) Z. Qiao, X. Jiang. Ligand-controlled divergent cross-coupling involving organosilicon compounds for thioether and thioester synthesis. *Org. Lett.* **2016**, *18*, 1550-1553.
- (7) S. P. Swain, Y. Chou, D. Hou. Thioesterifications free of activating agent and thiol: A three-component reaction of carboxylic acids, thioureas, and michael acceptors. *Adv. Synth. Catal.* **2015**, *357*, 2644-2650.
- (8) H. Cao, L. McNamee, H. Alper. Palladium-catalyzed thiocarbonylation of iodoarenes with thiols in phosphonium salt ionic liquids. *J. Org. Chem.* **2008**, *73*, 3530-3534.

- (9) R. F. Brookes, J. E. Cranham, D. Greenwood, H. A. Stevenson. The toxicity of organic sulphides to the eggs and larvae of the glasshouse red spider mite. II. miscellaneous sulfide. *J. Sci. Food Agric.* **1957**, 8, 561-565.
- (10) S. Peter, T. Konrad, V. Juergen. Vibrational spectra and dipole moment measurements on the configuration of oxalates and thiooxalates. *J. Am. Chem. Soc.* **1974**, 4, 671-689.
- (11) C. Jouen, M. C. Lasne, J.C. Pommelet. Synthesis of  $\alpha$ -fluorinated- $\alpha,\alpha$ -difunctionalized sulfides and sulfones. *Tetrahedron Lett.* **1996**, 37, 2413-2416.

# IV. $^1\text{H}$ and $^{13}\text{C}$ NMR

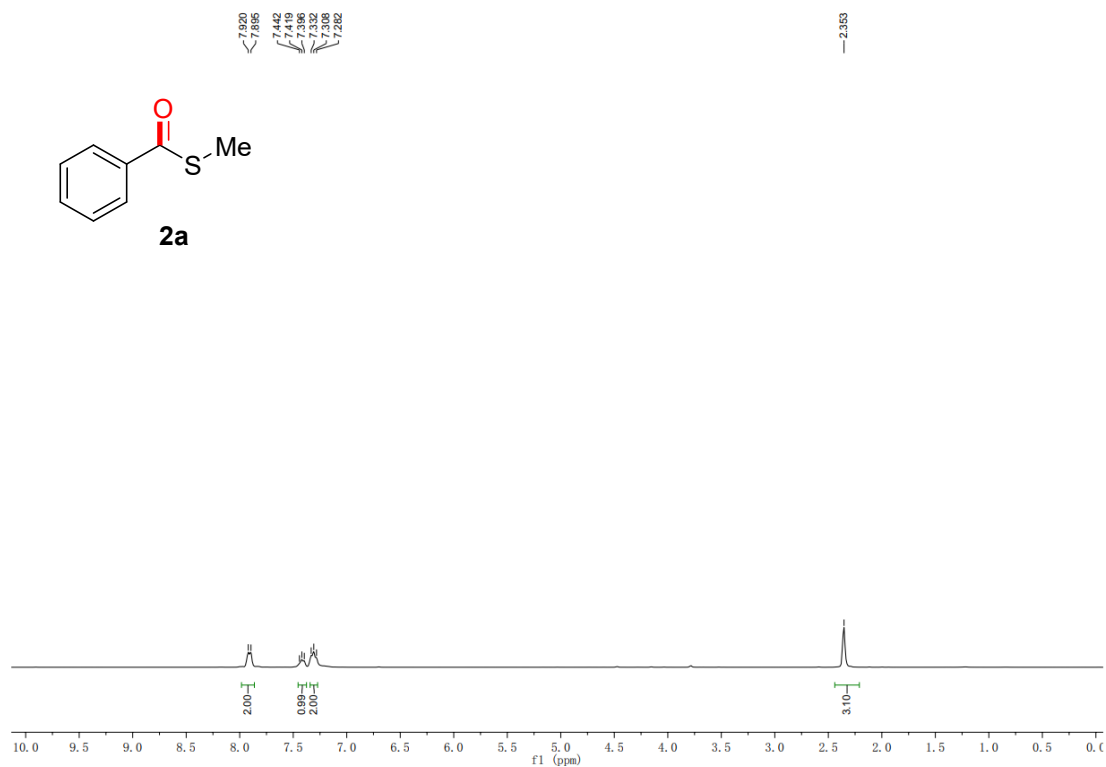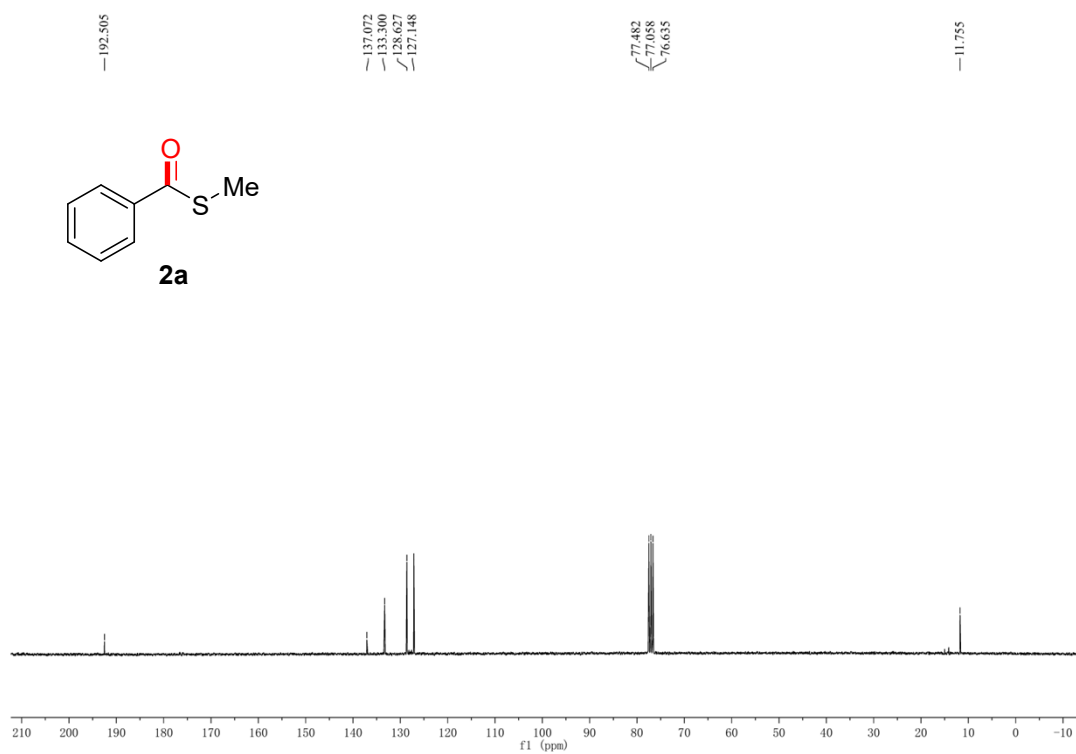

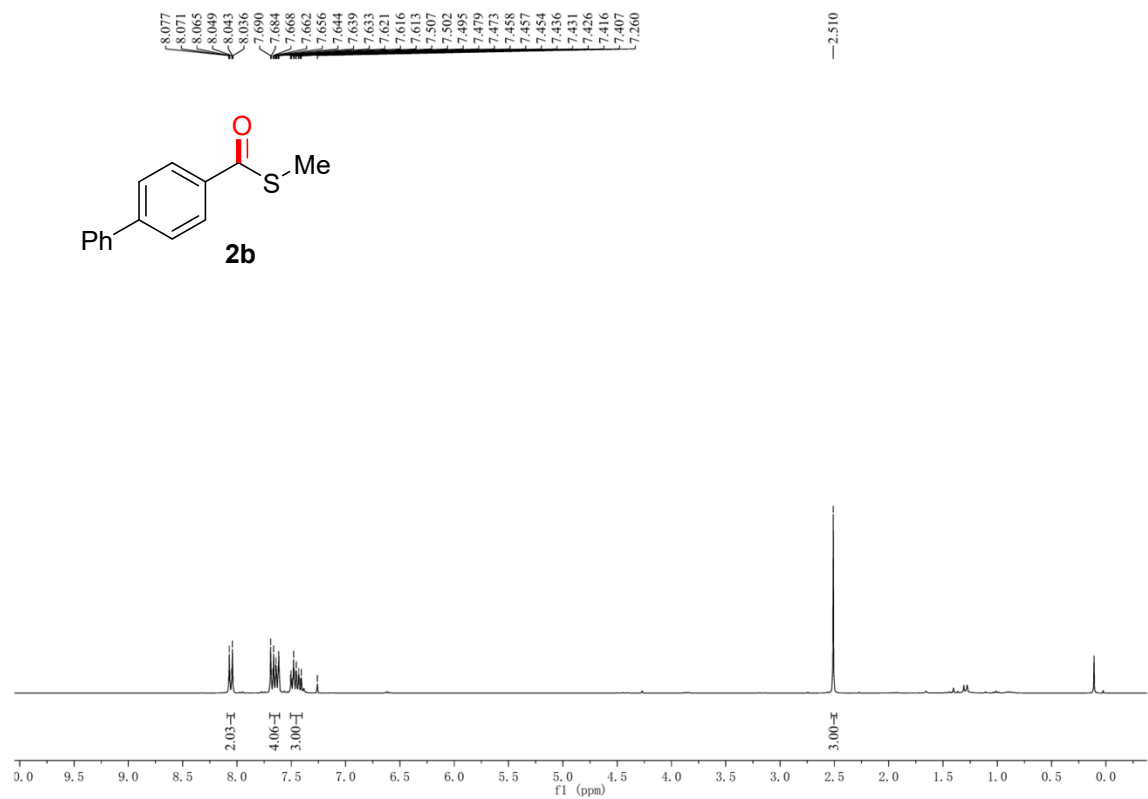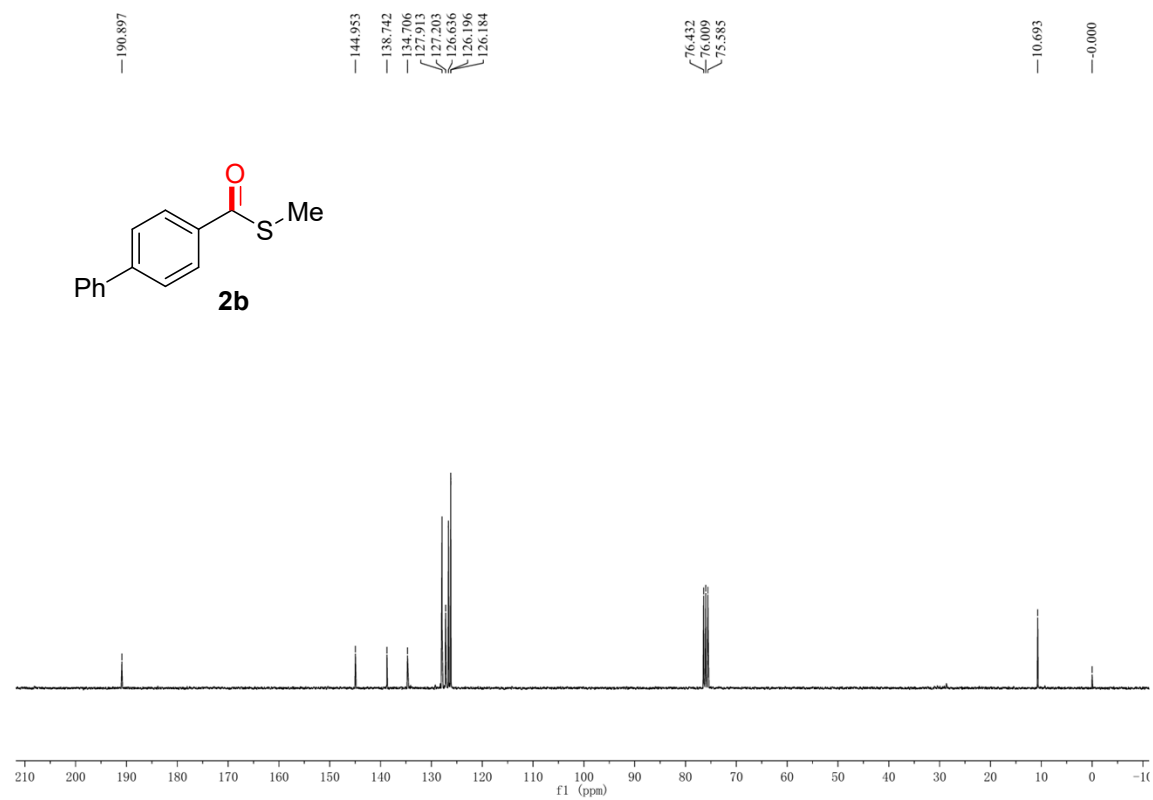

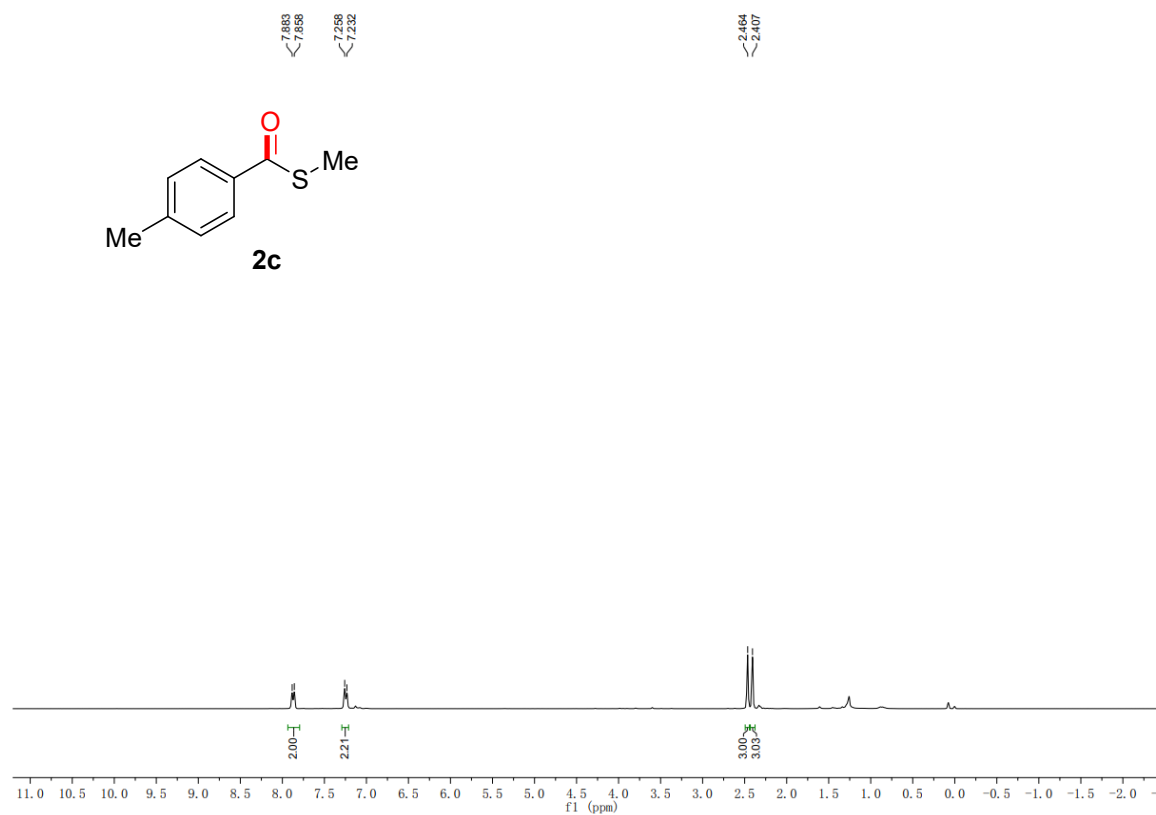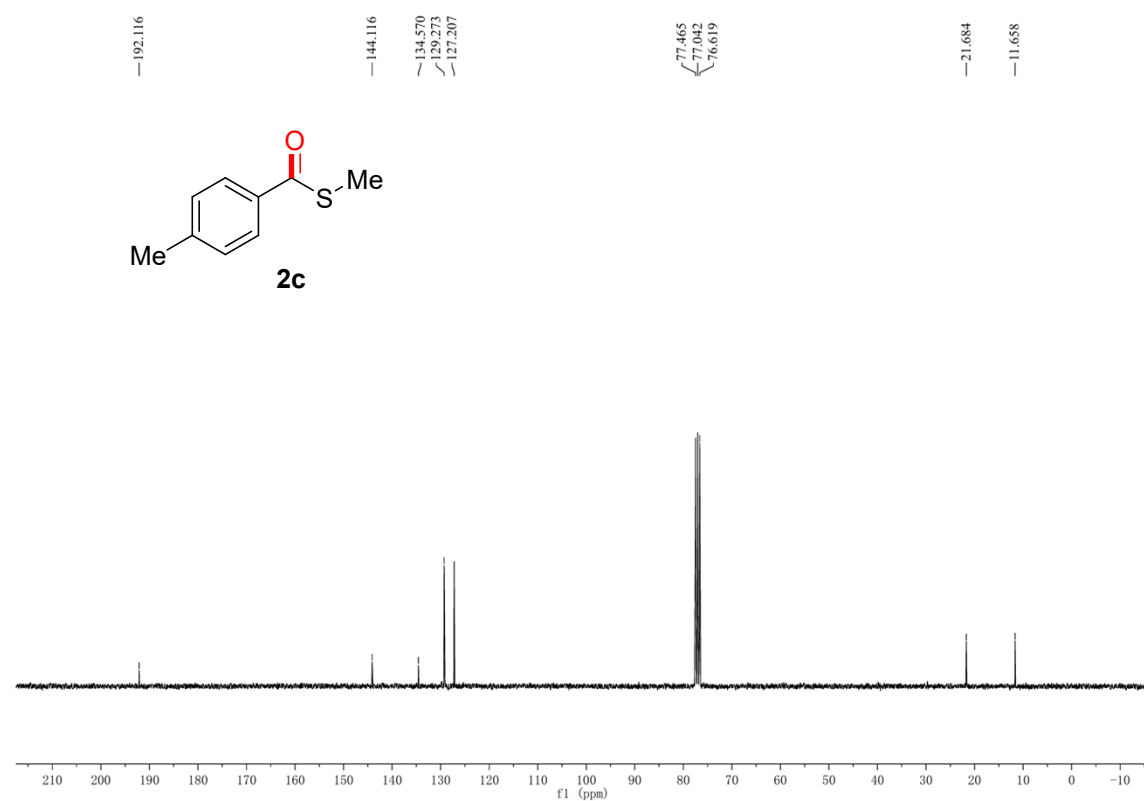

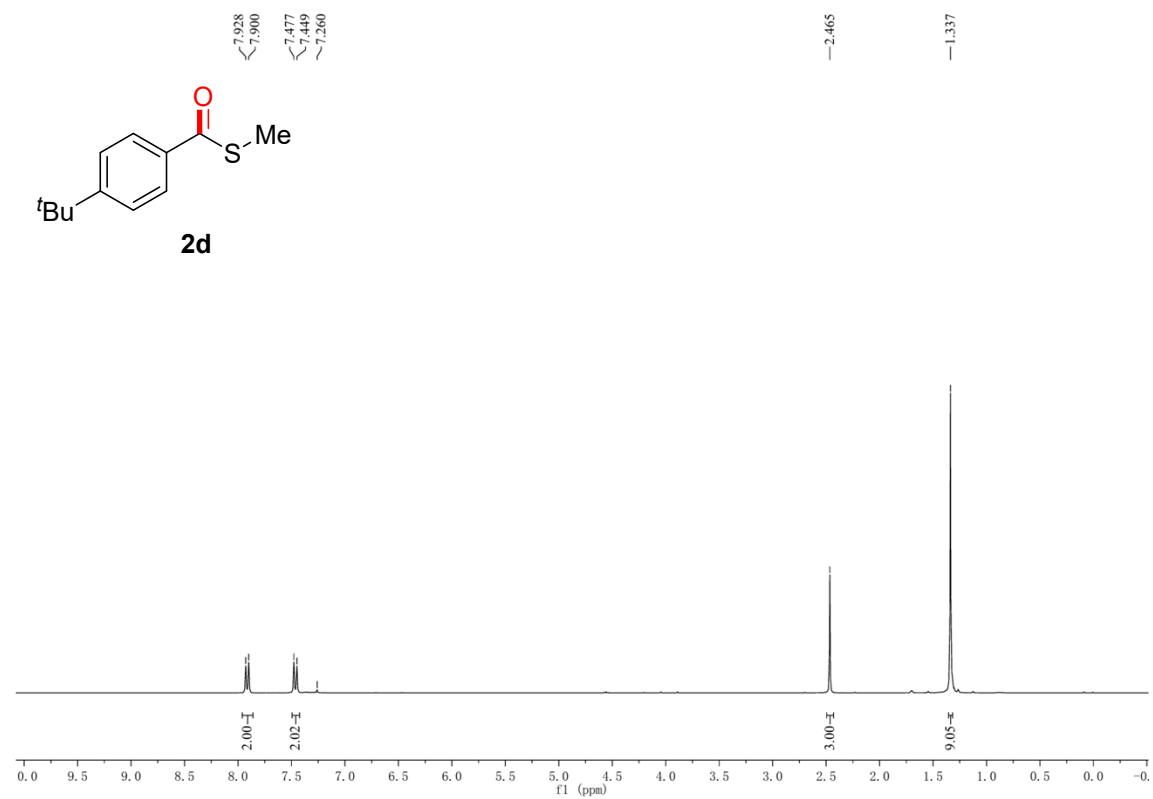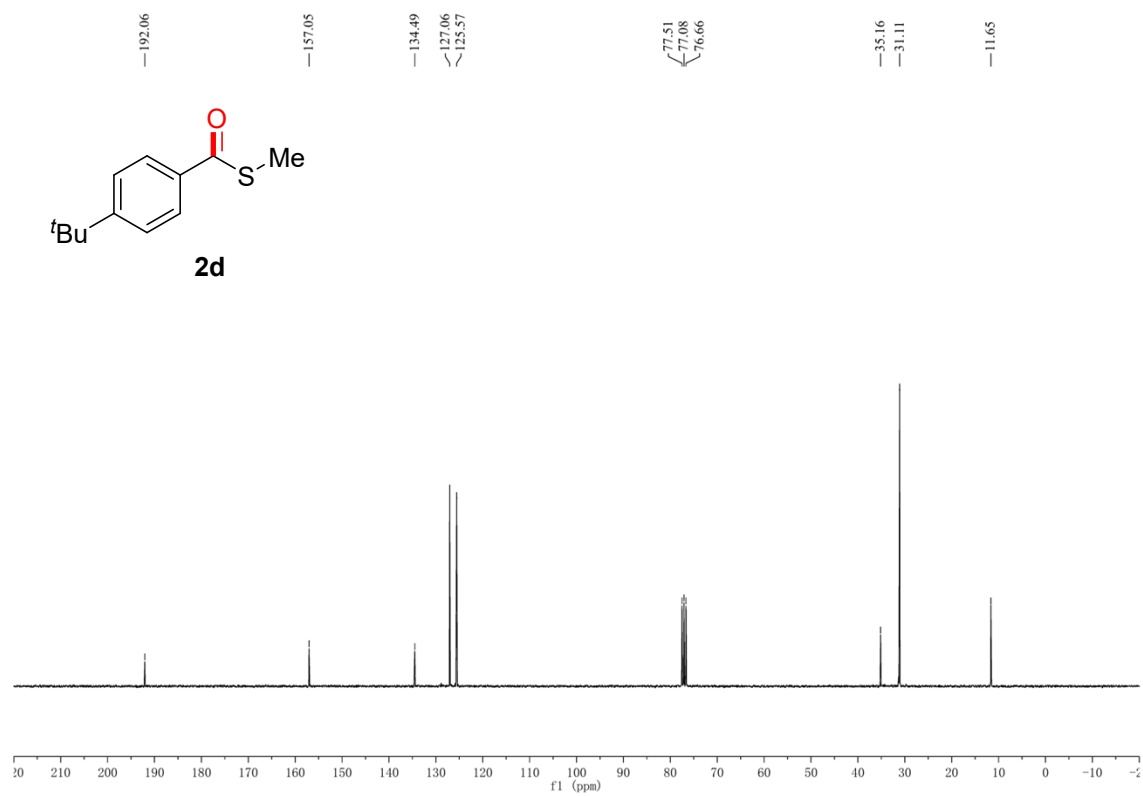



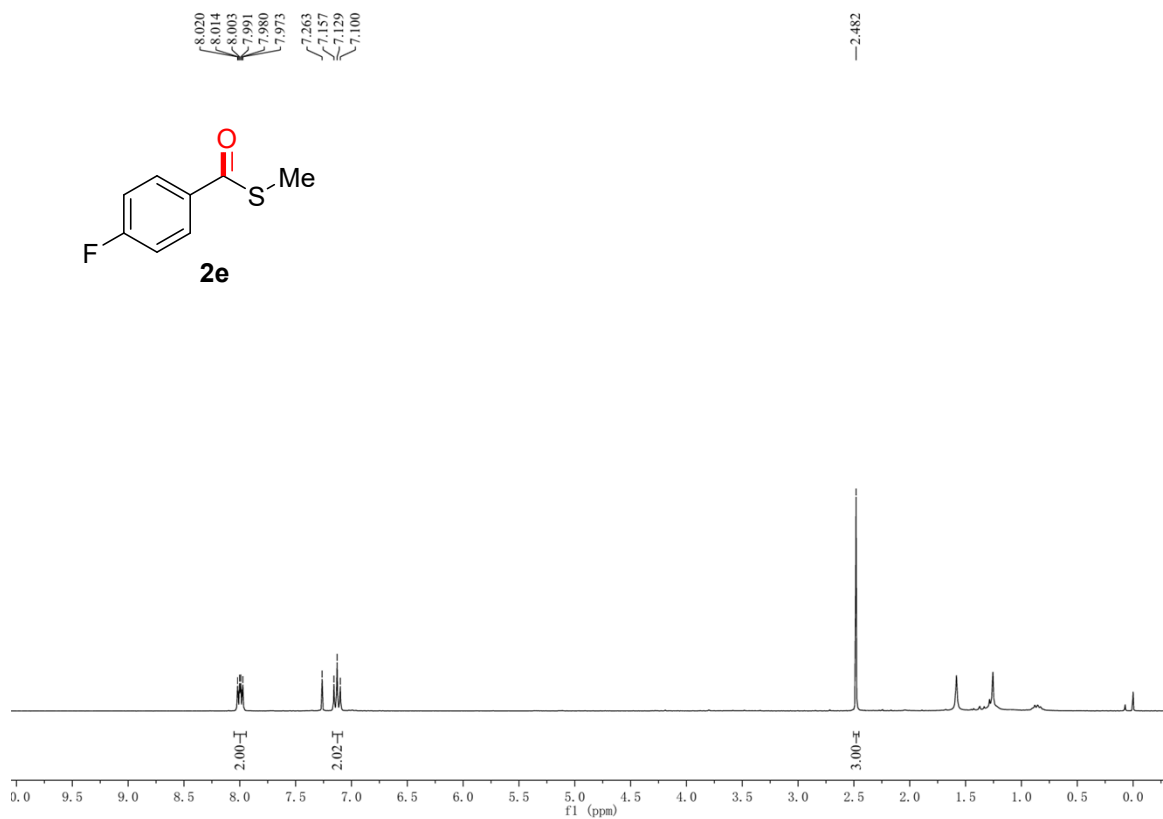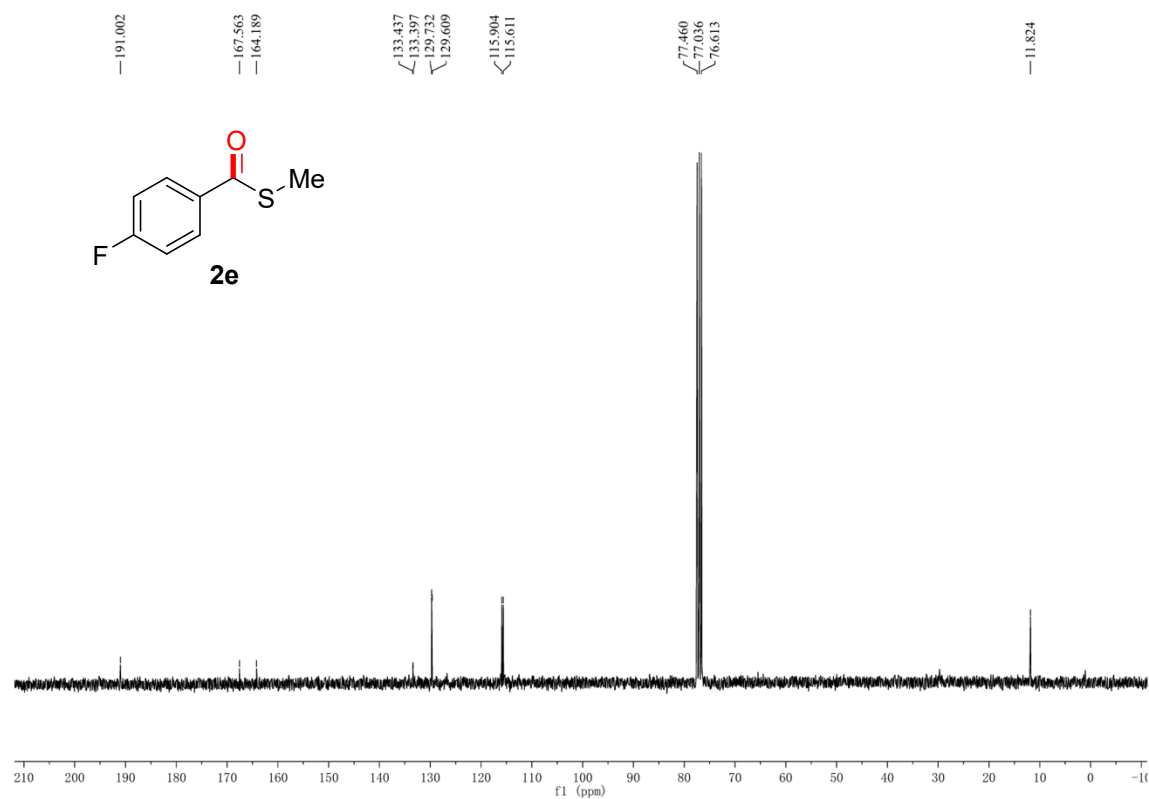

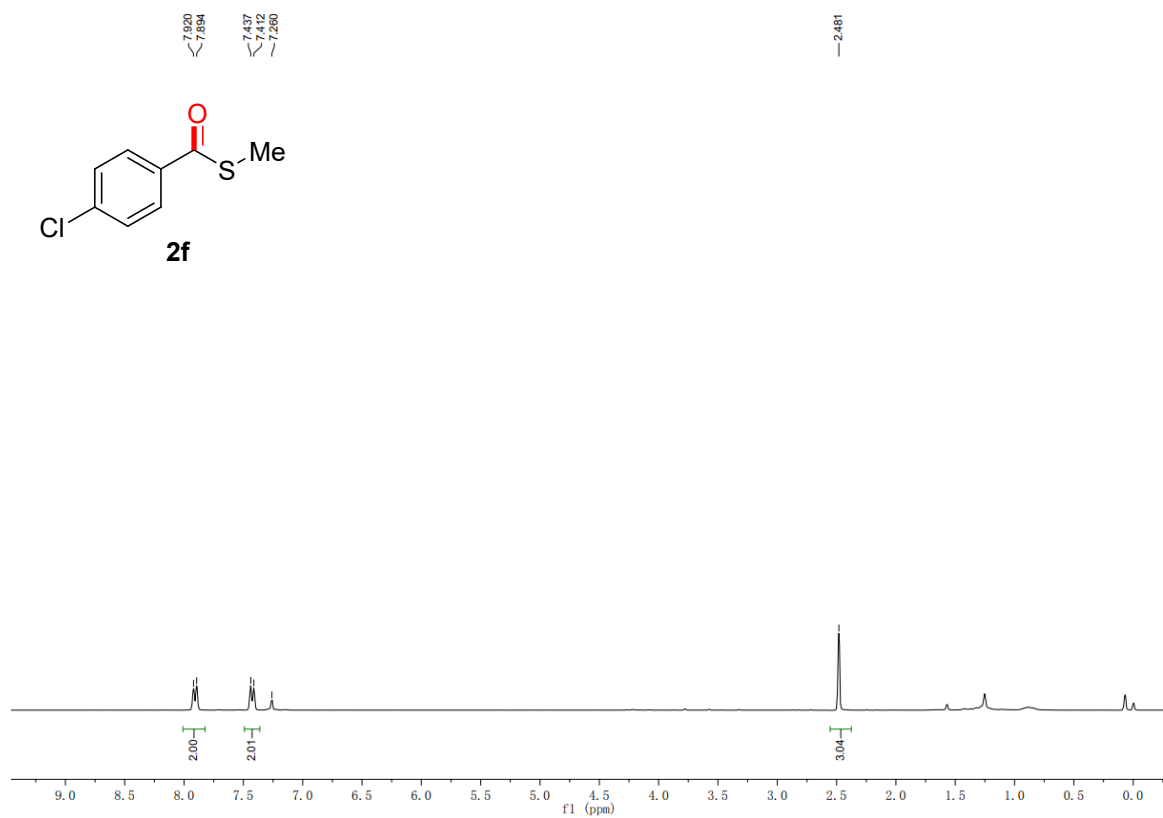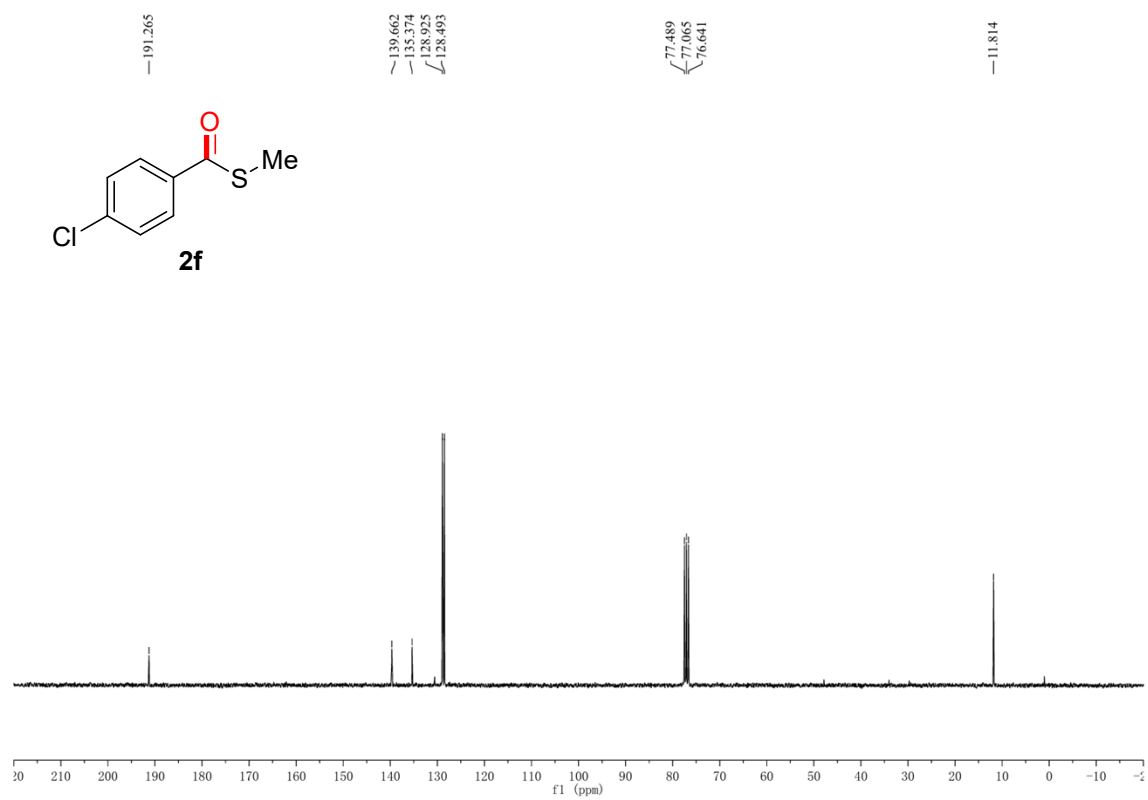

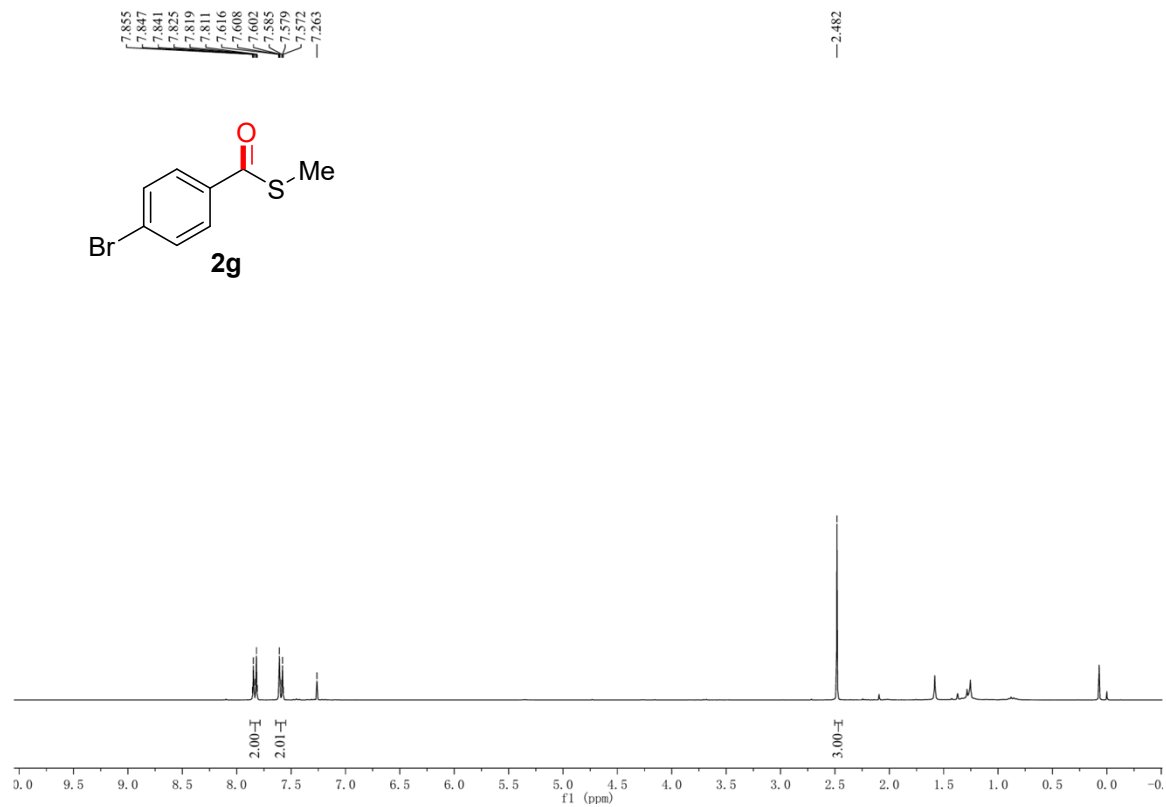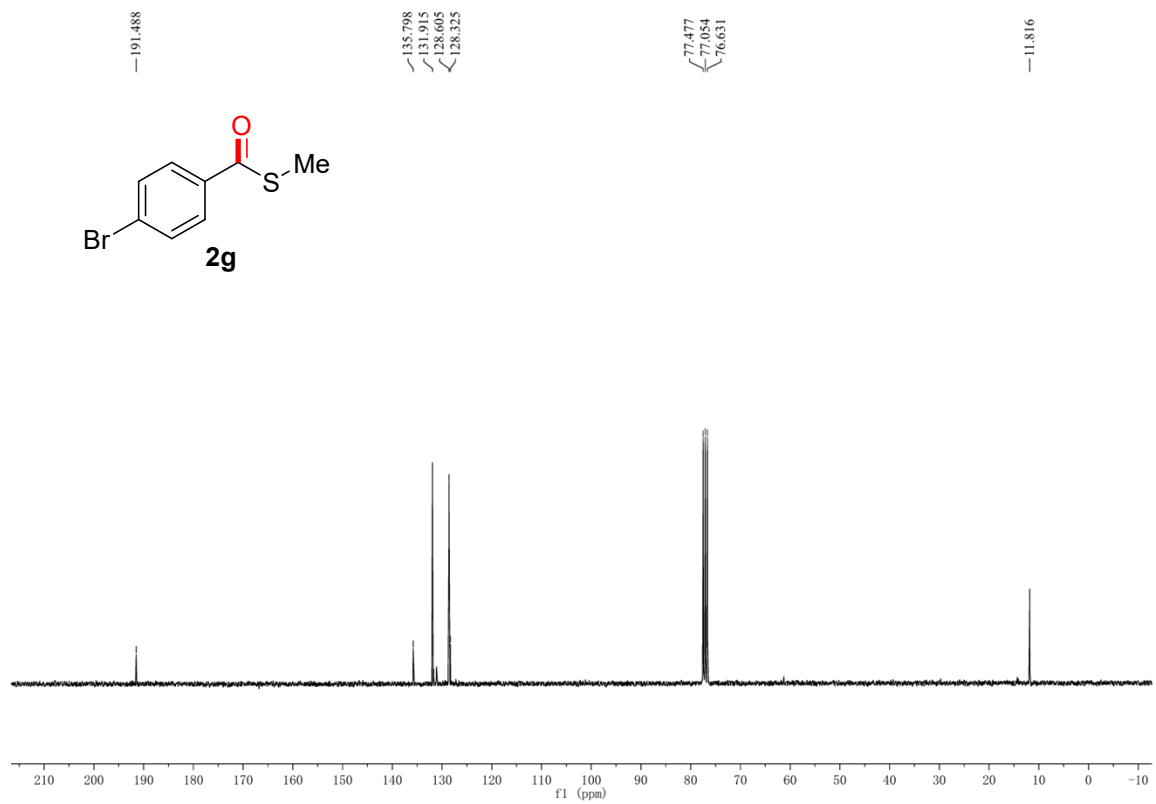

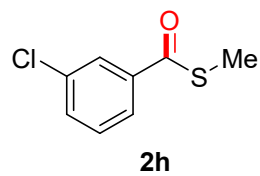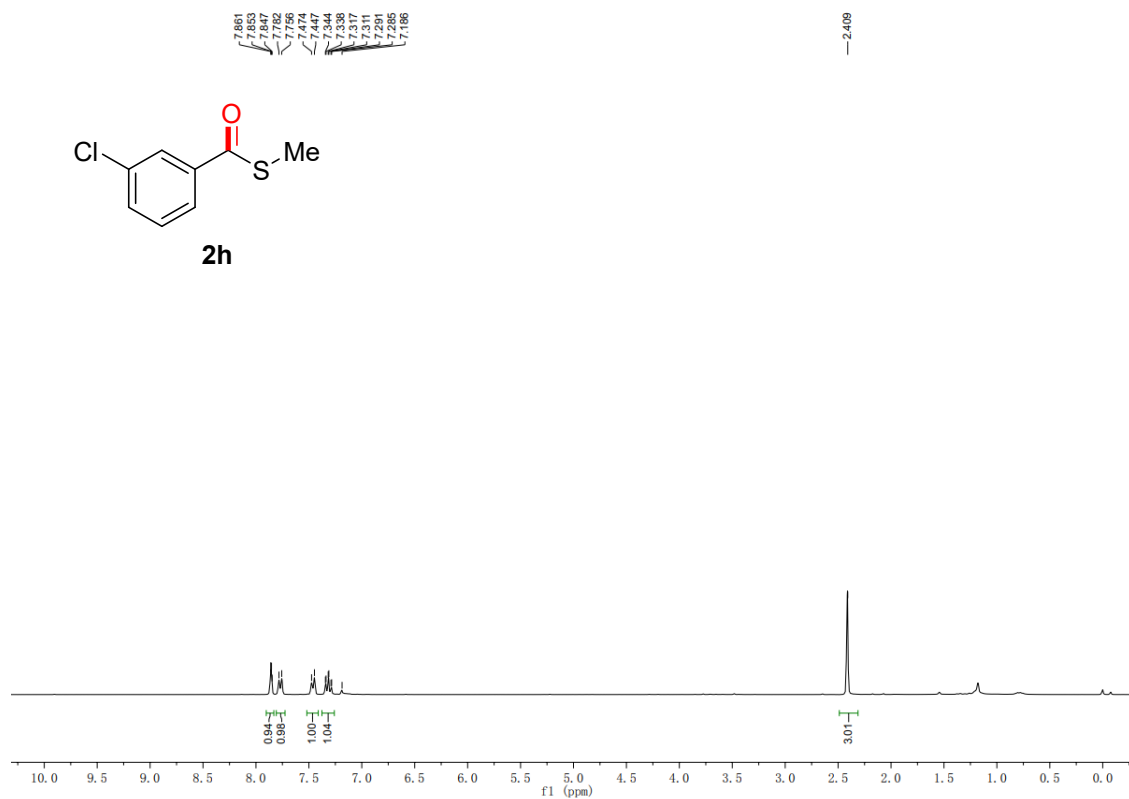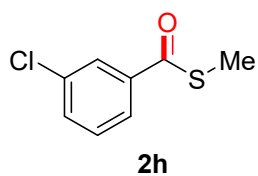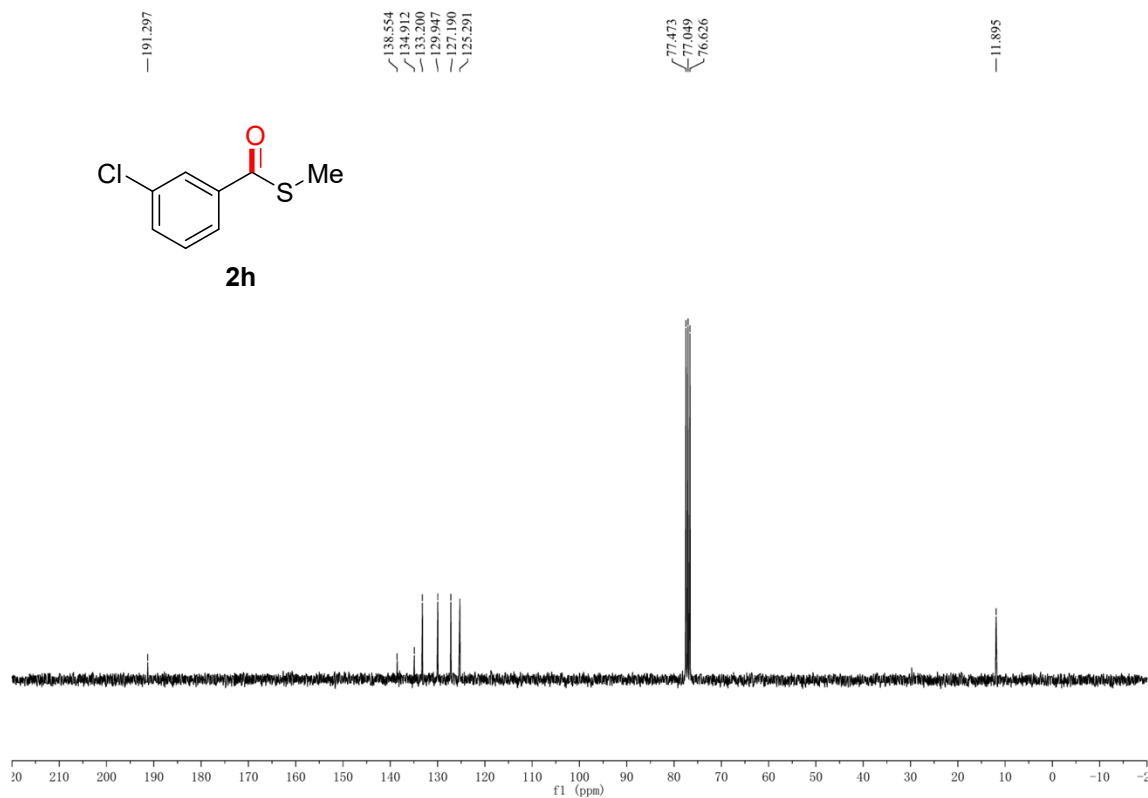

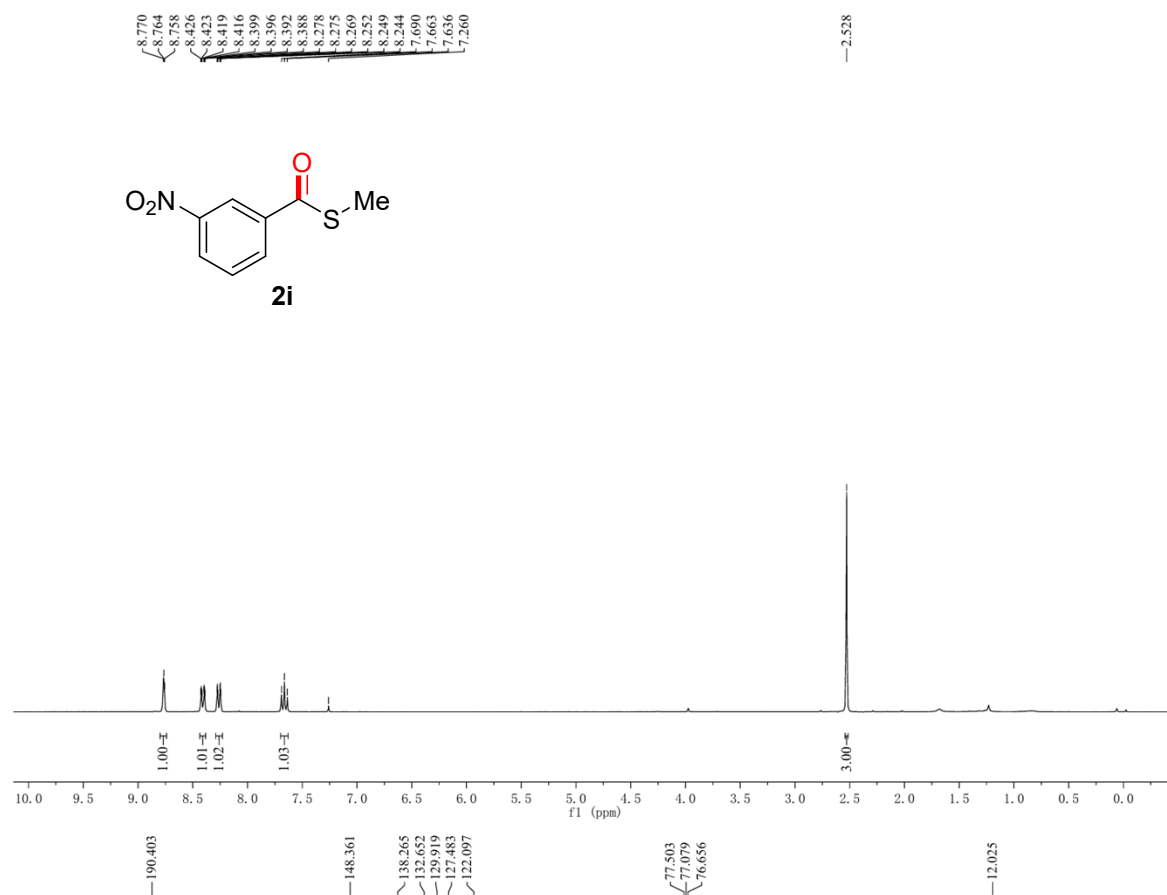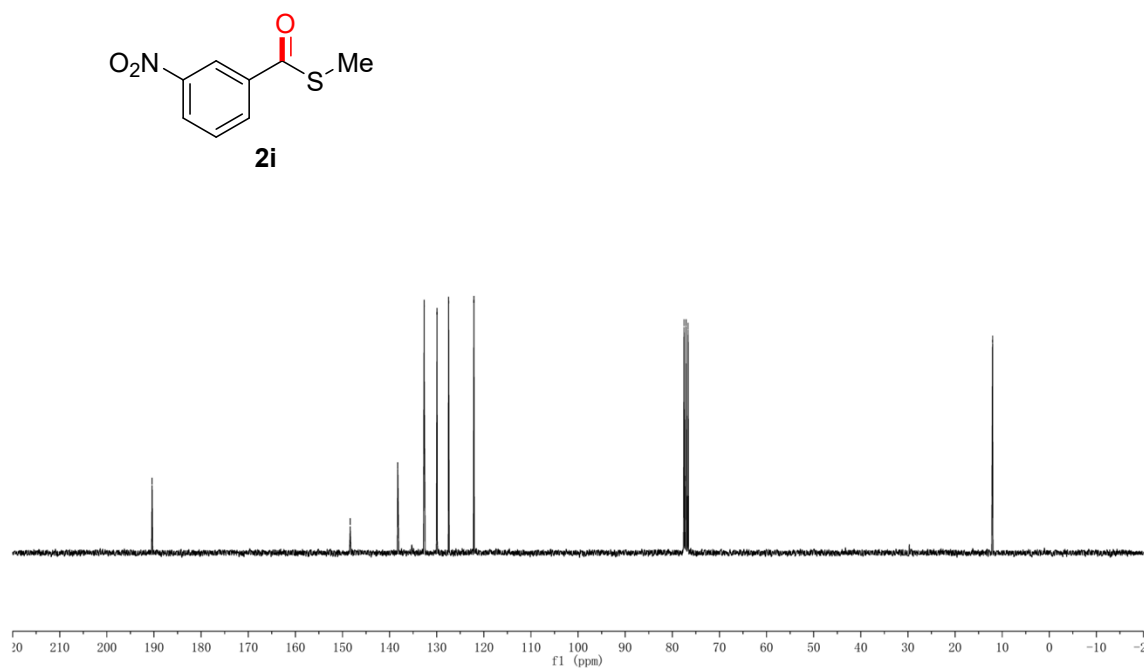

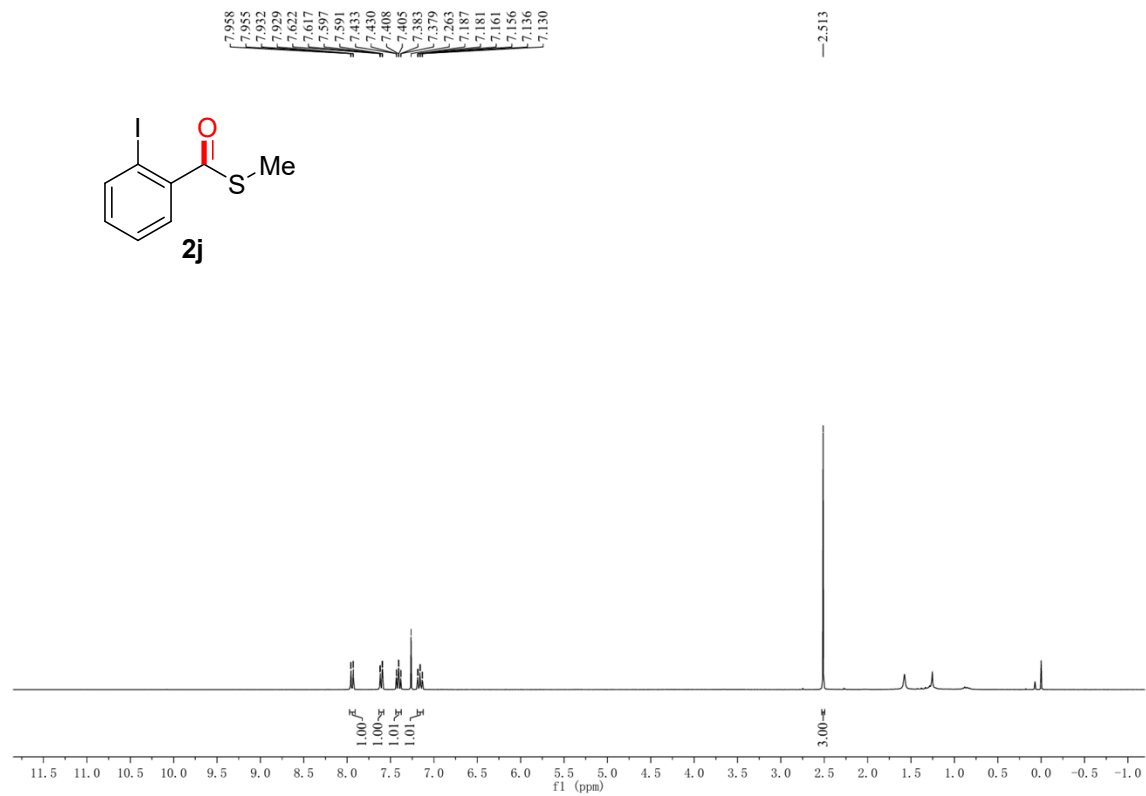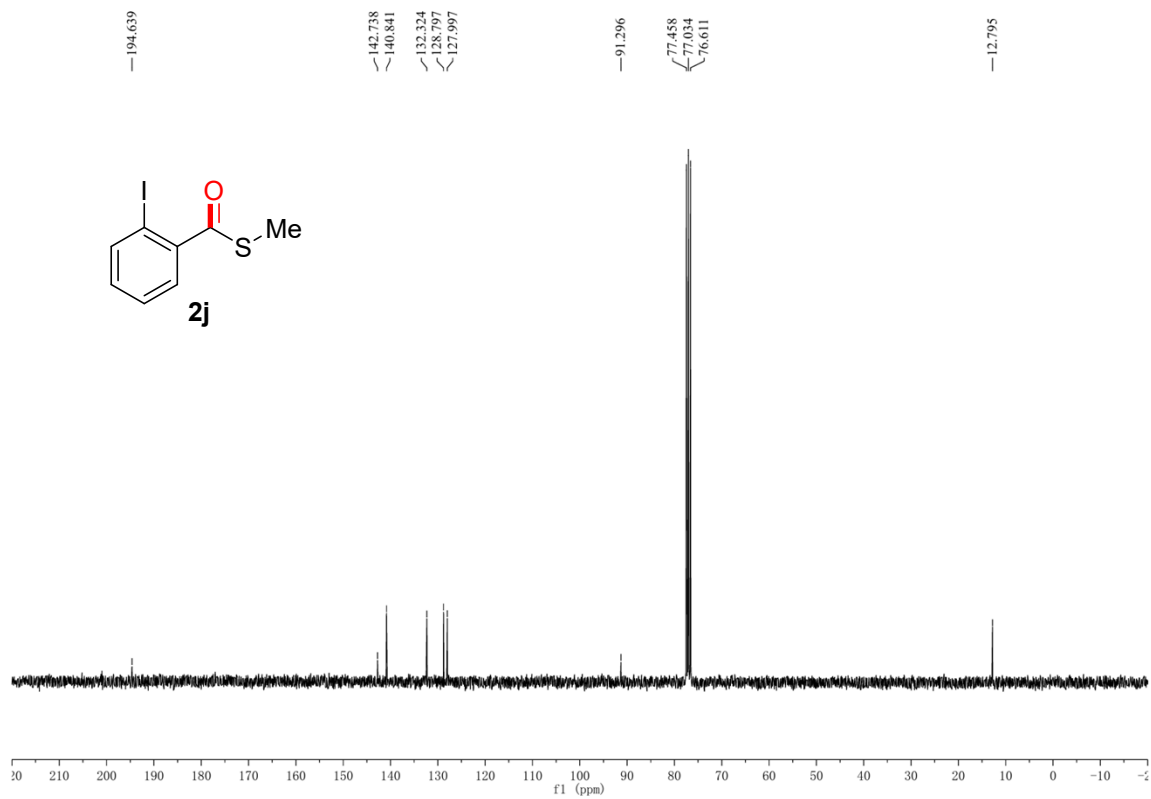

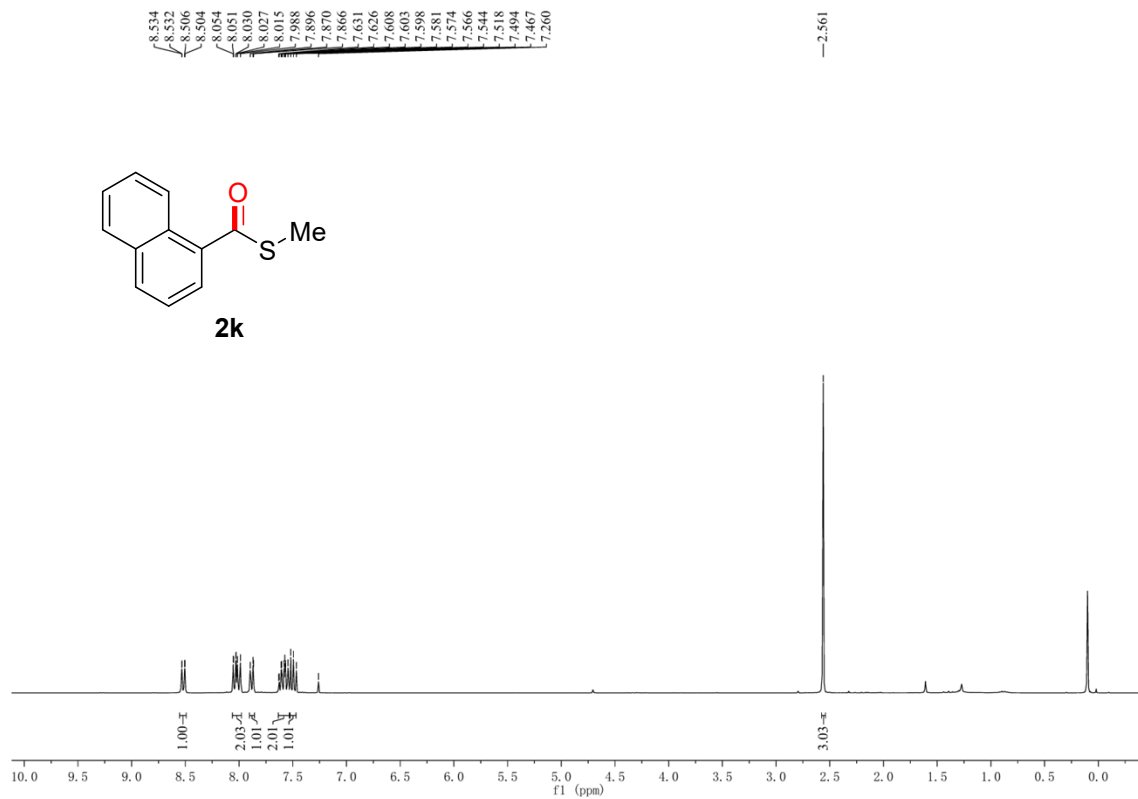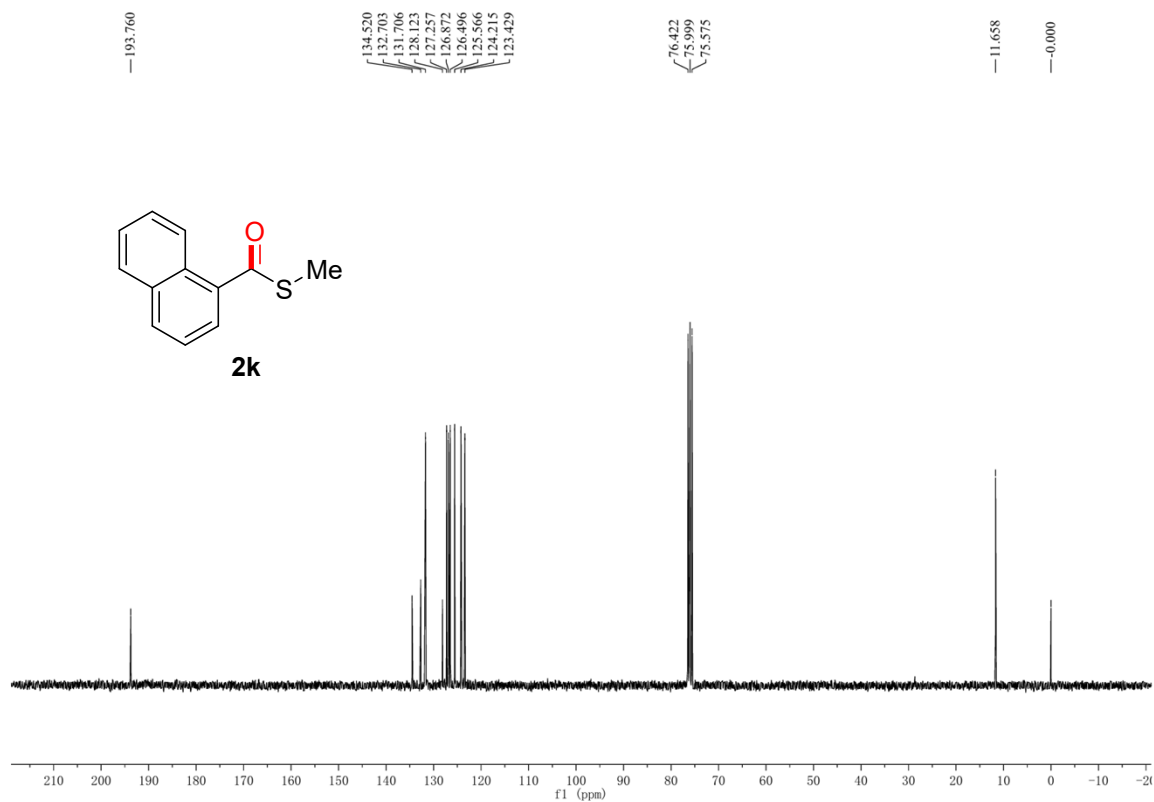

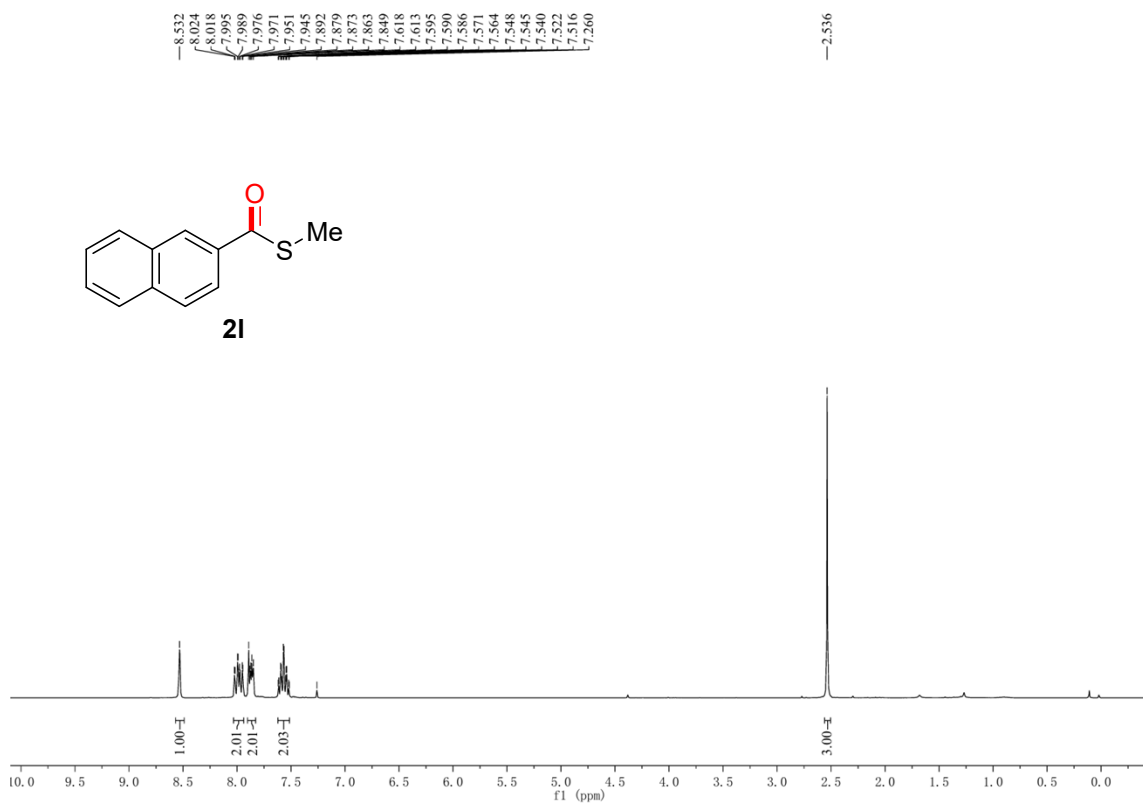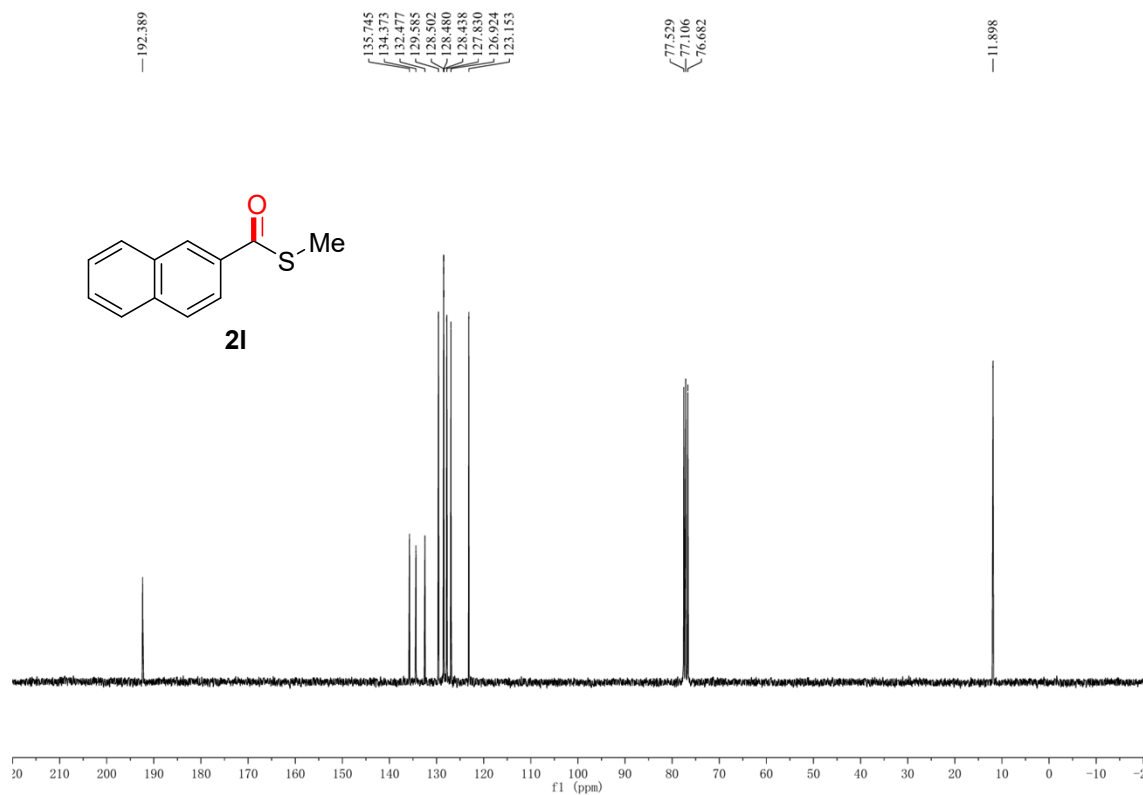



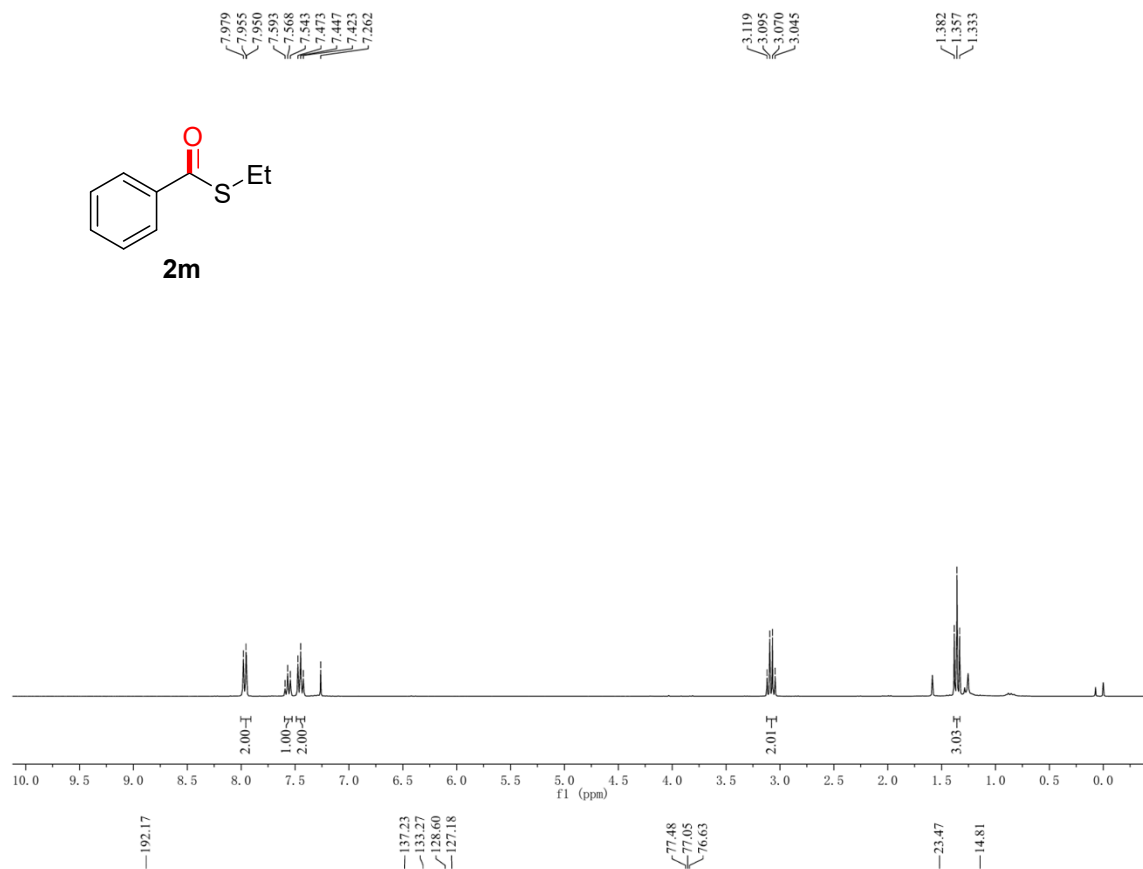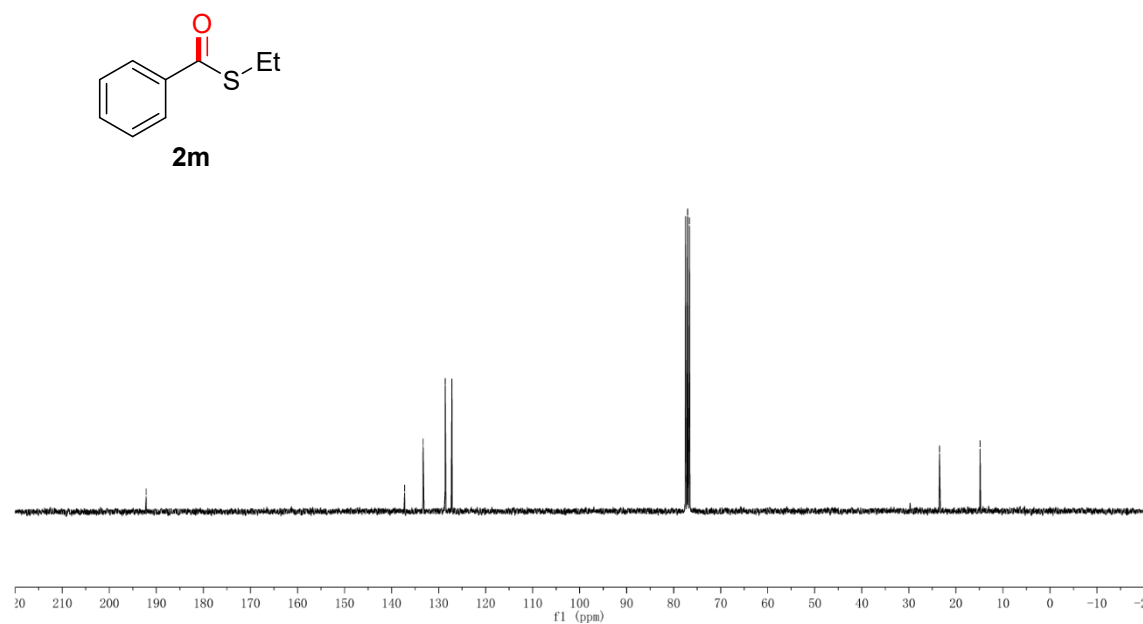

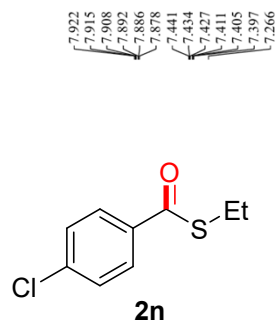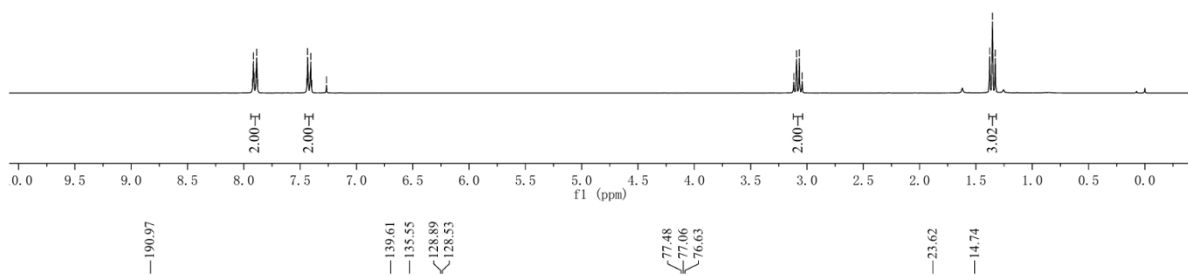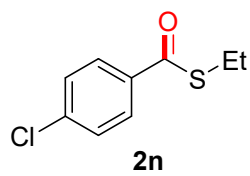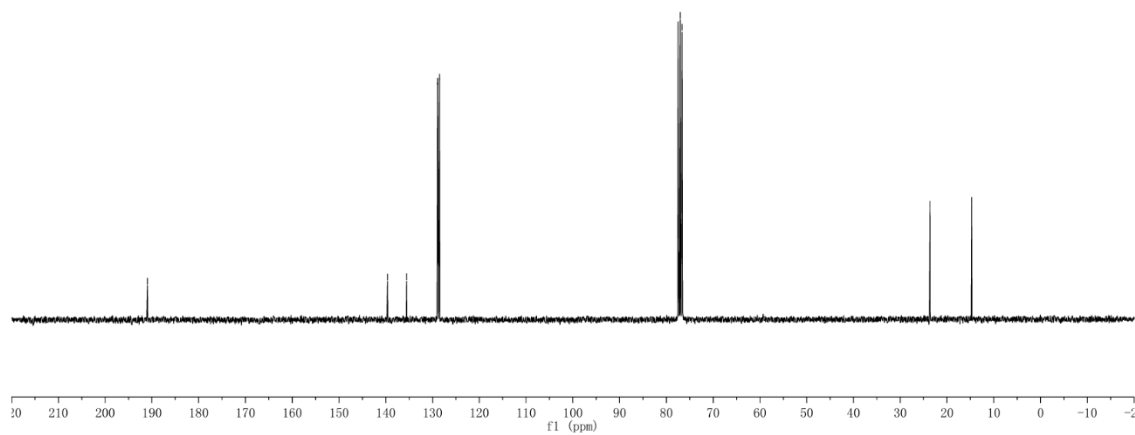

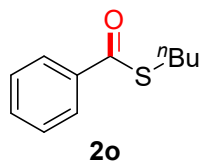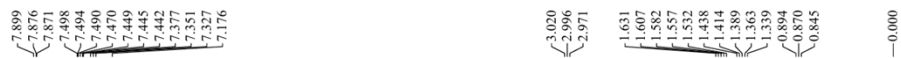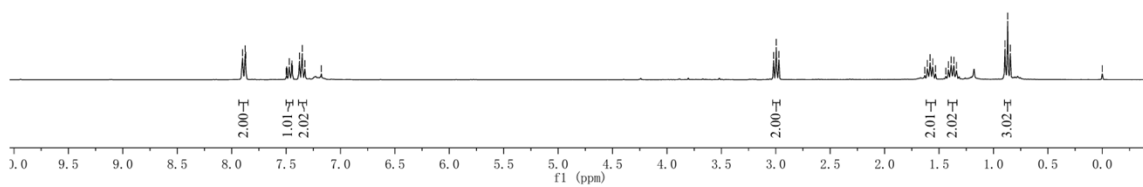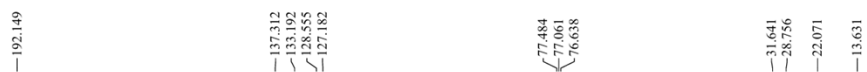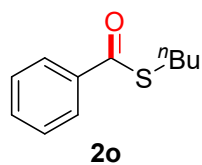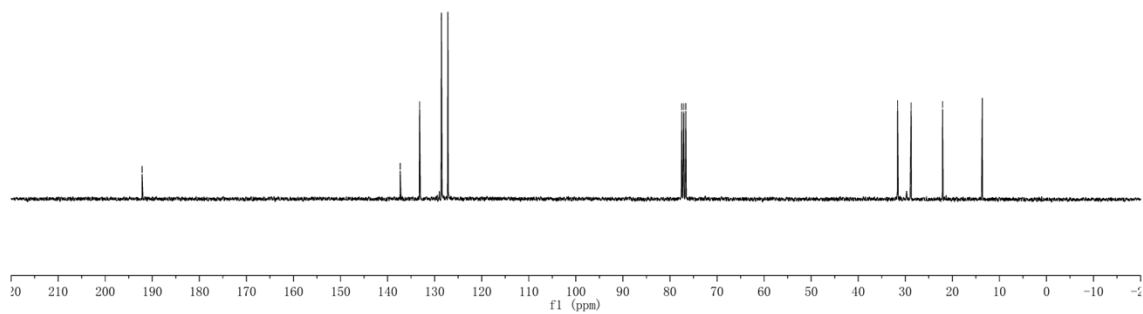

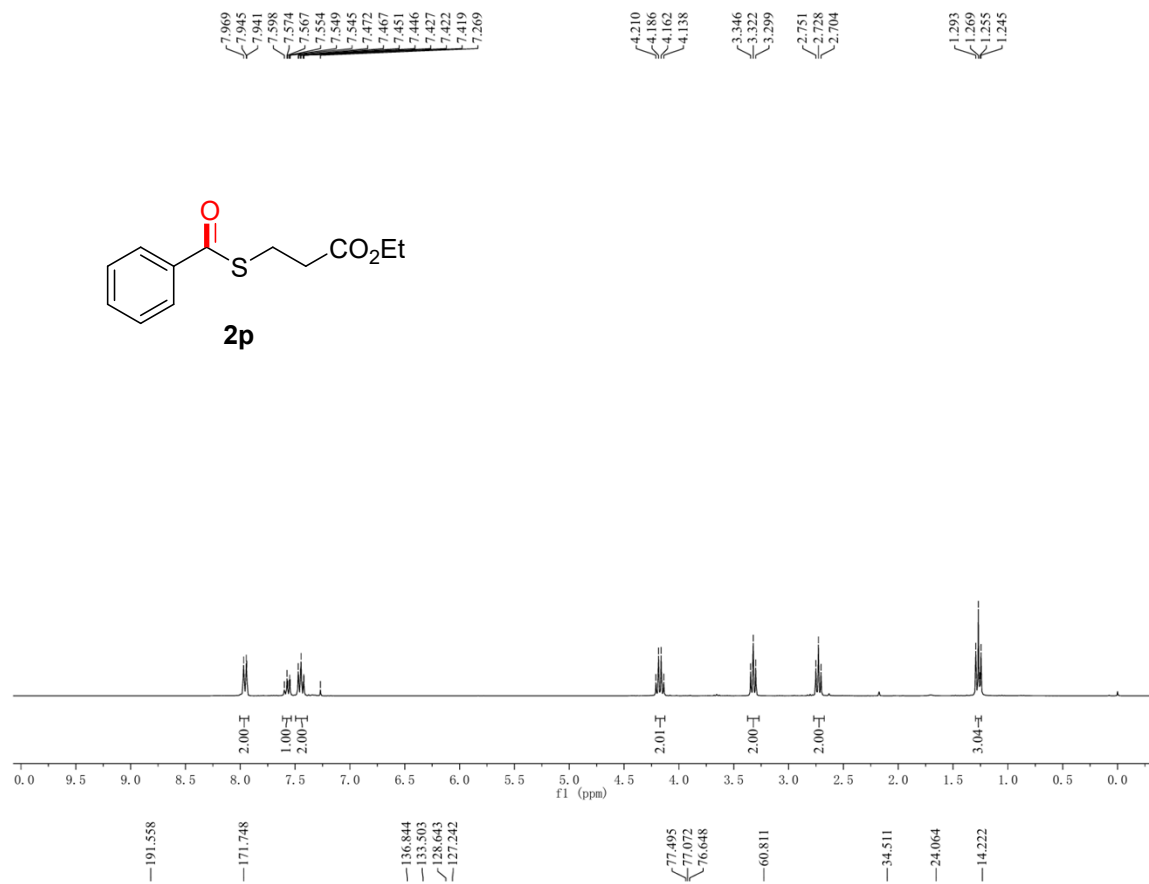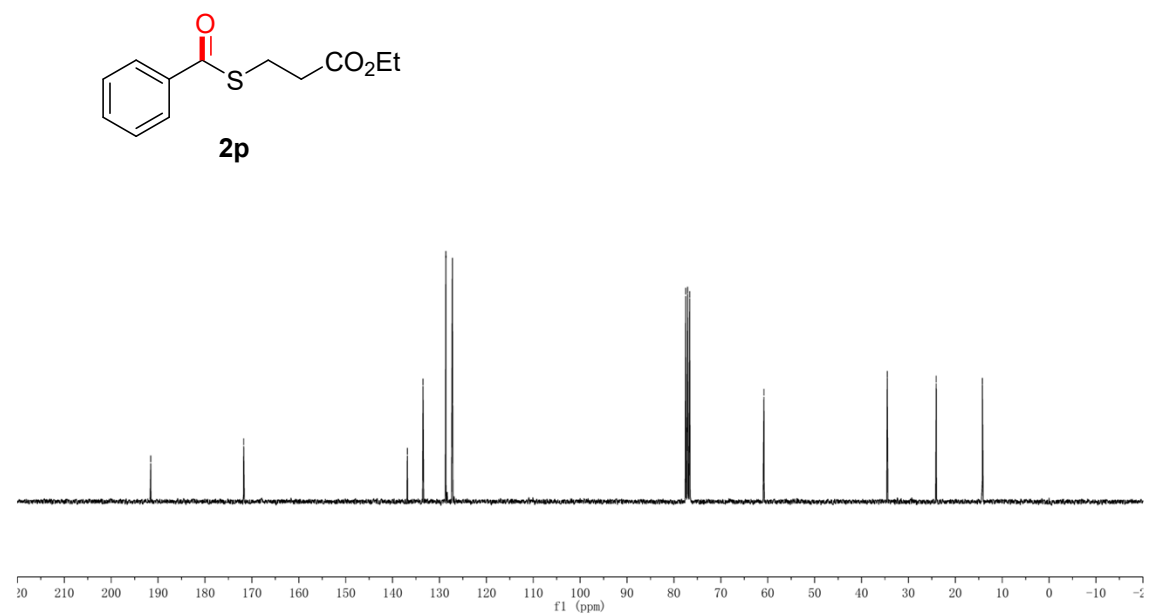

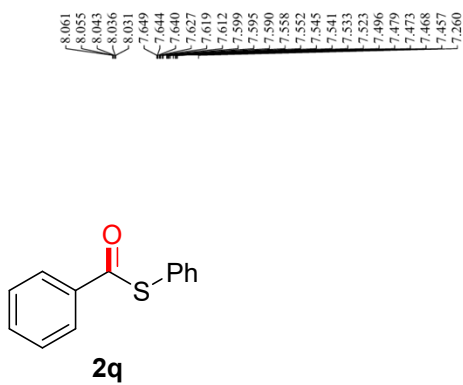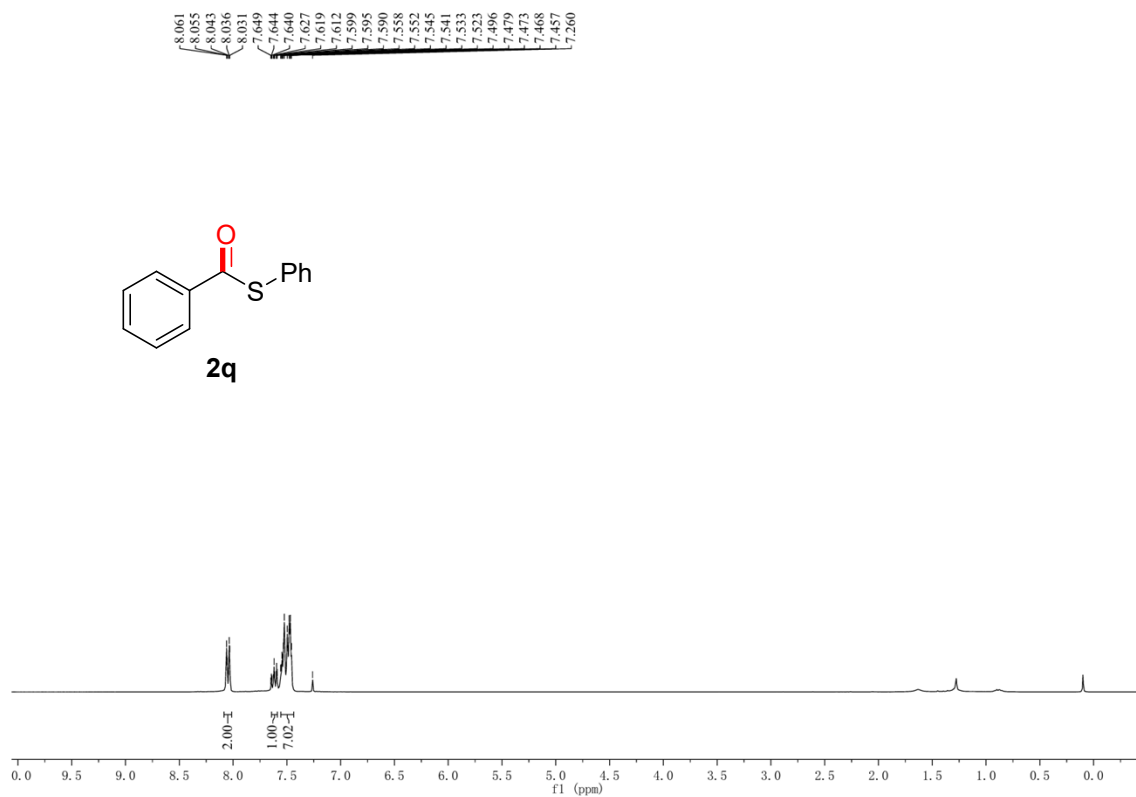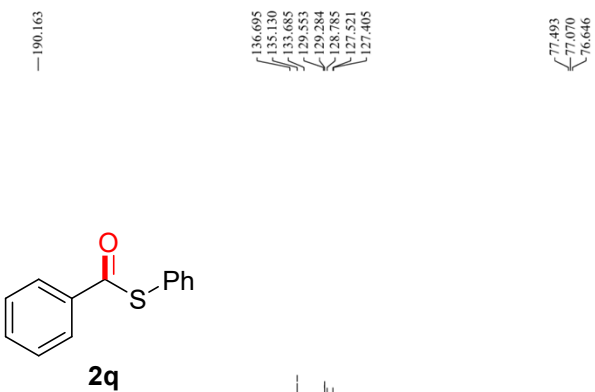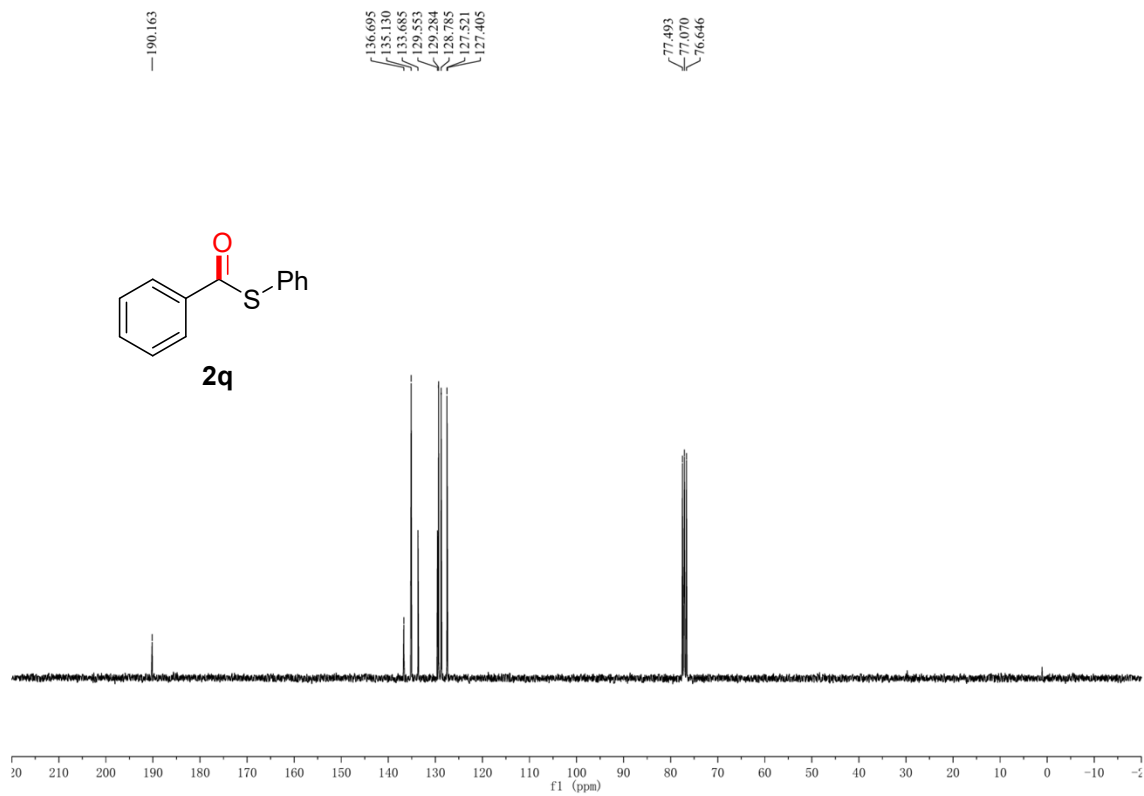

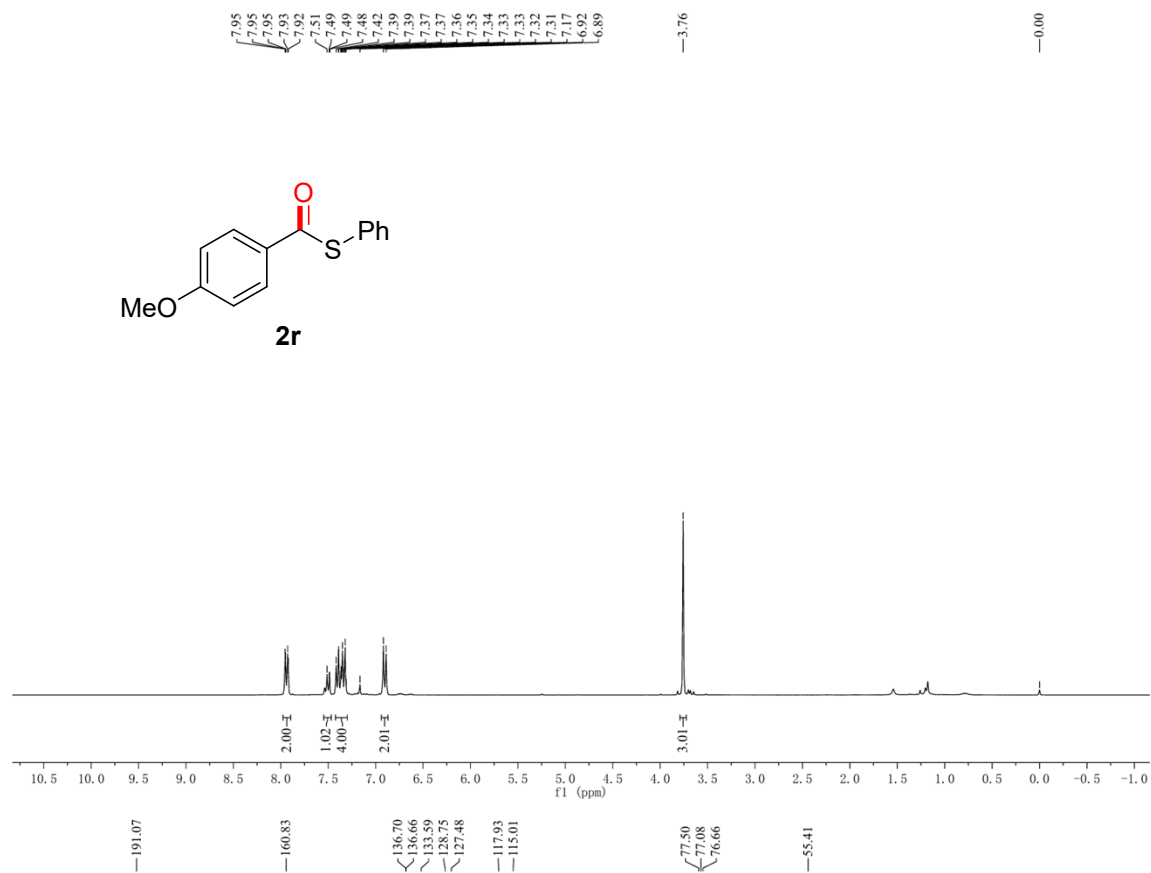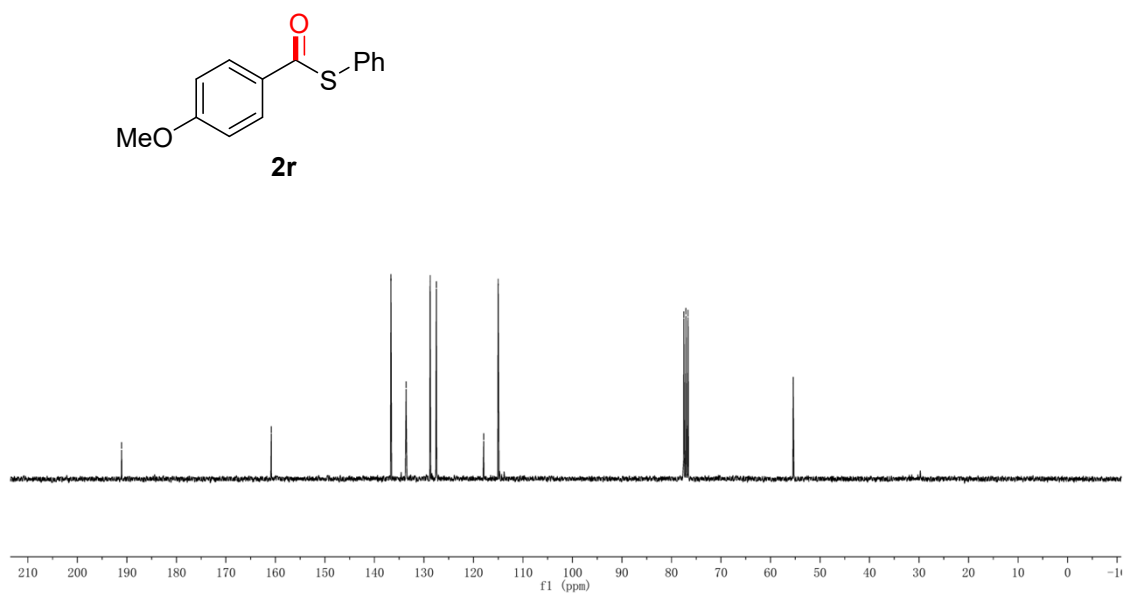

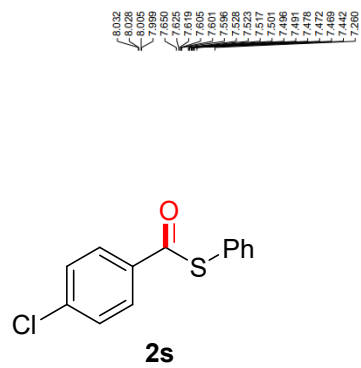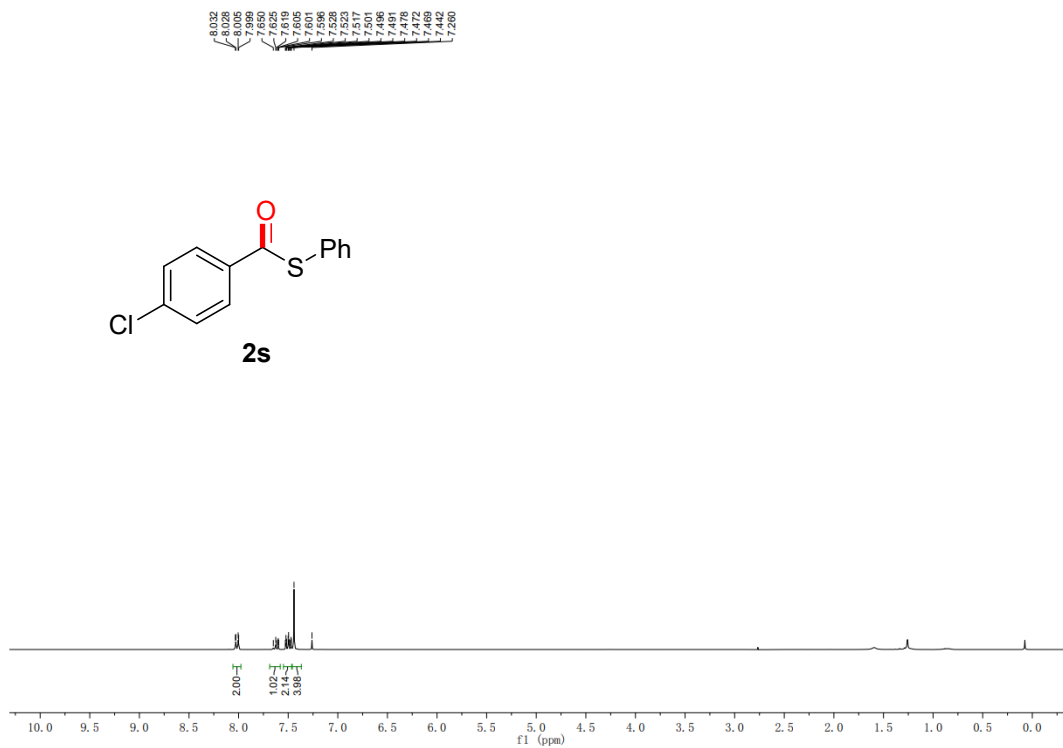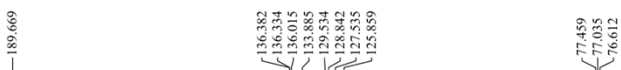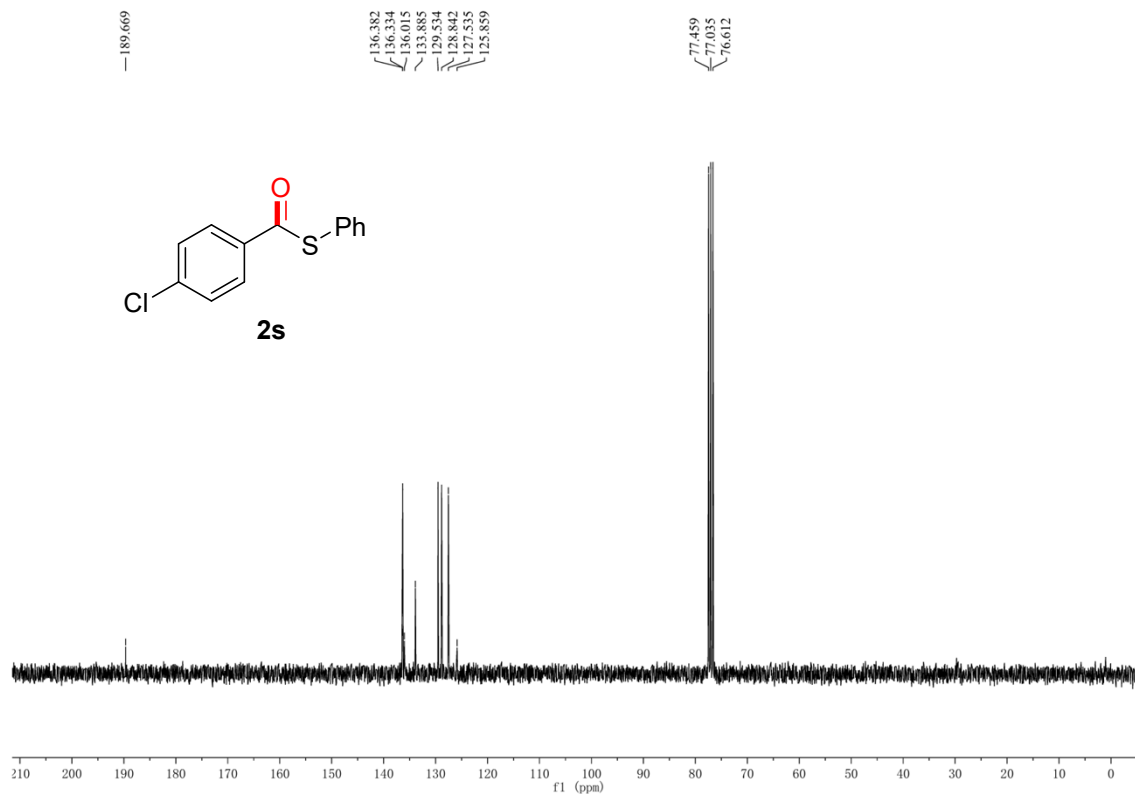

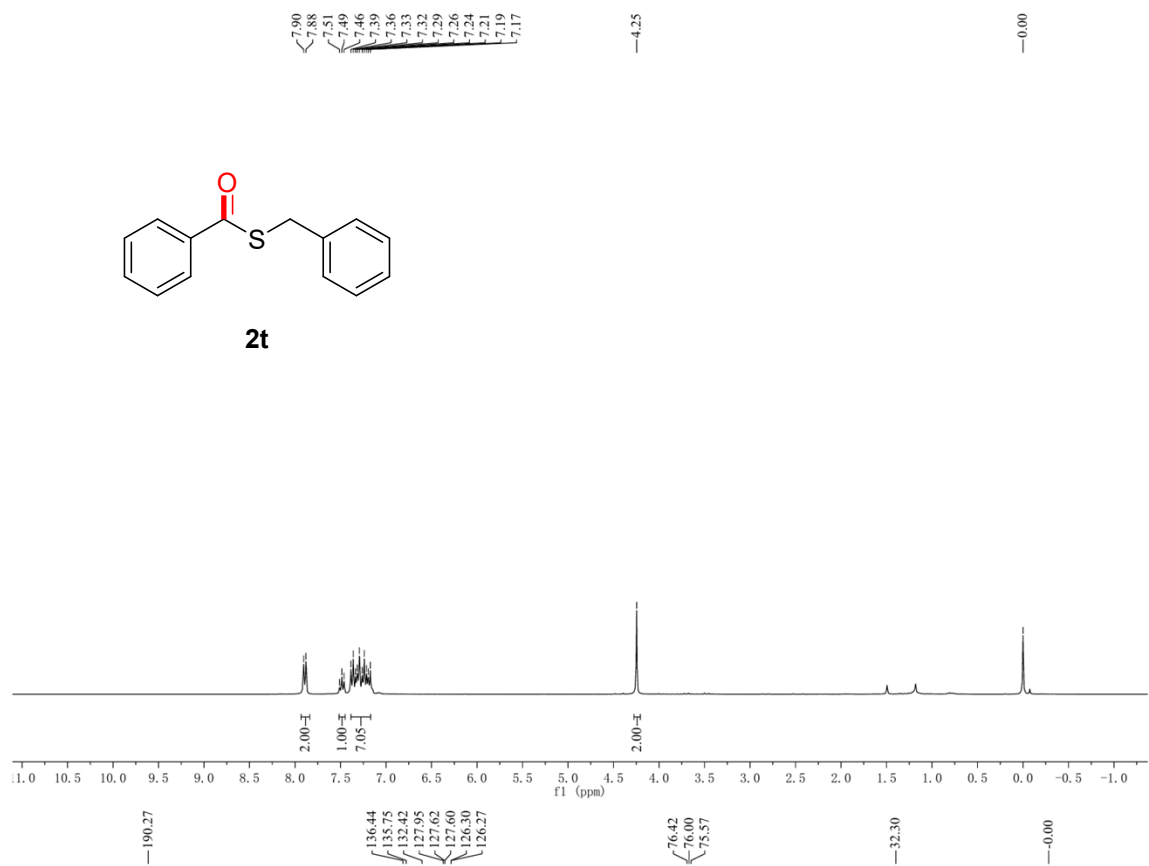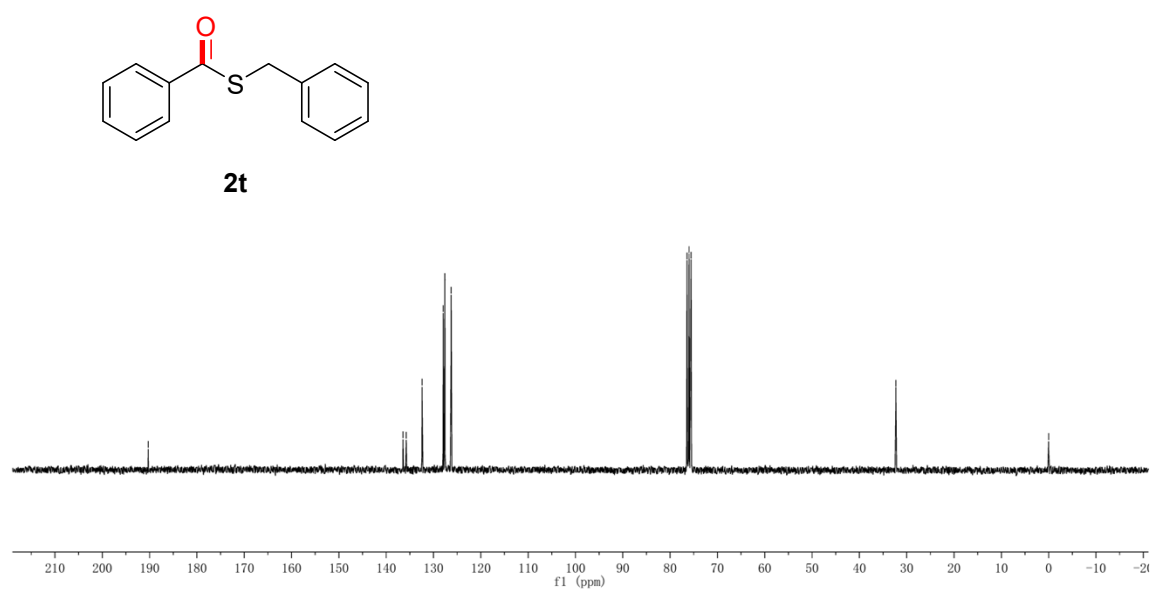



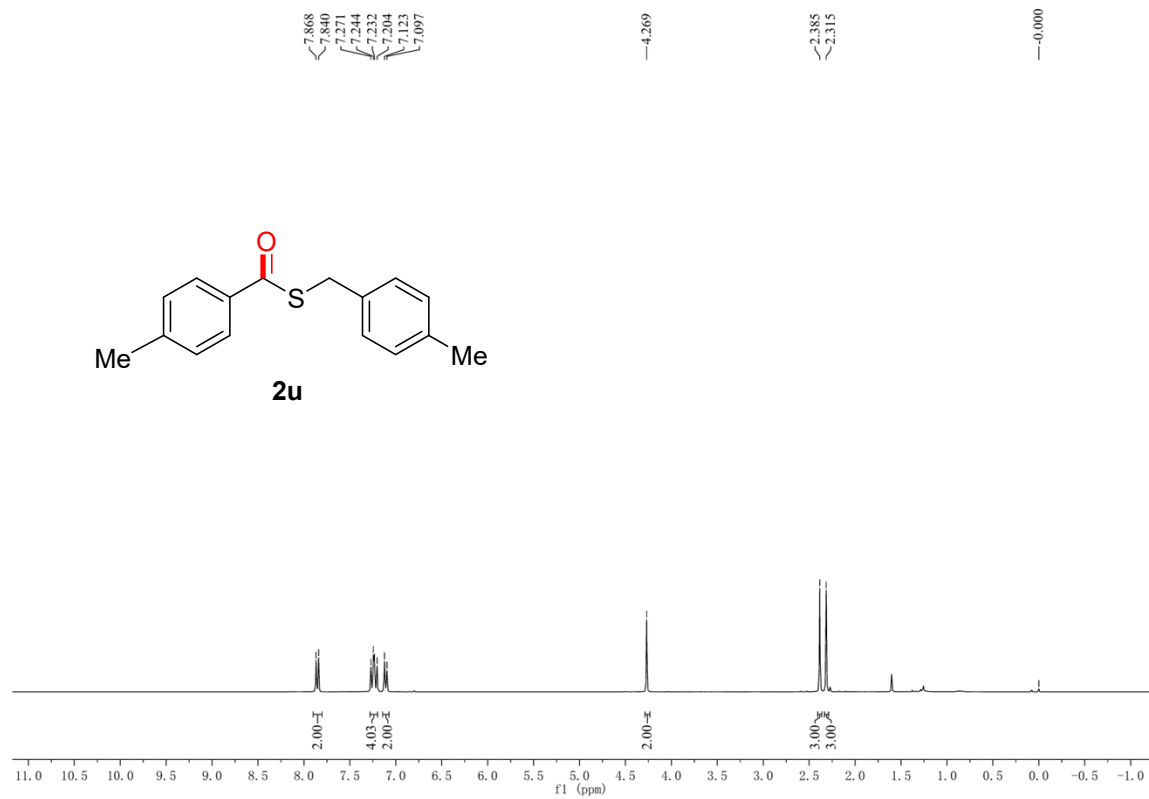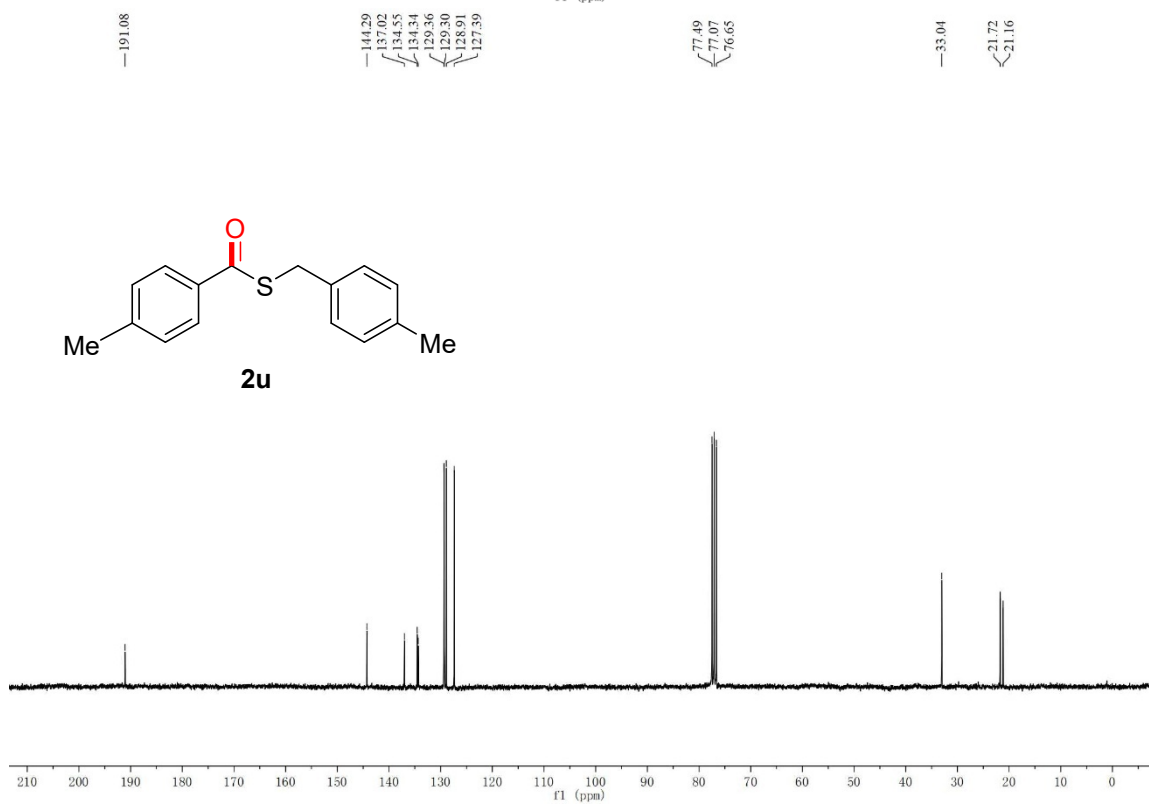

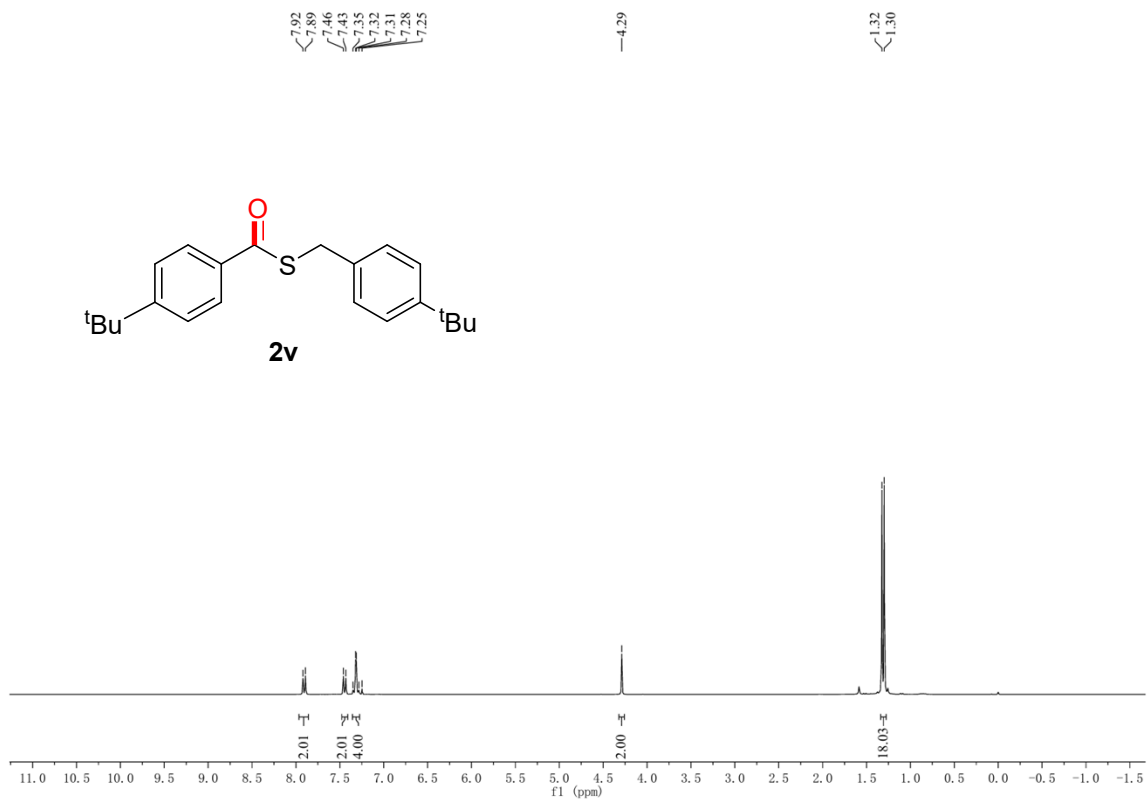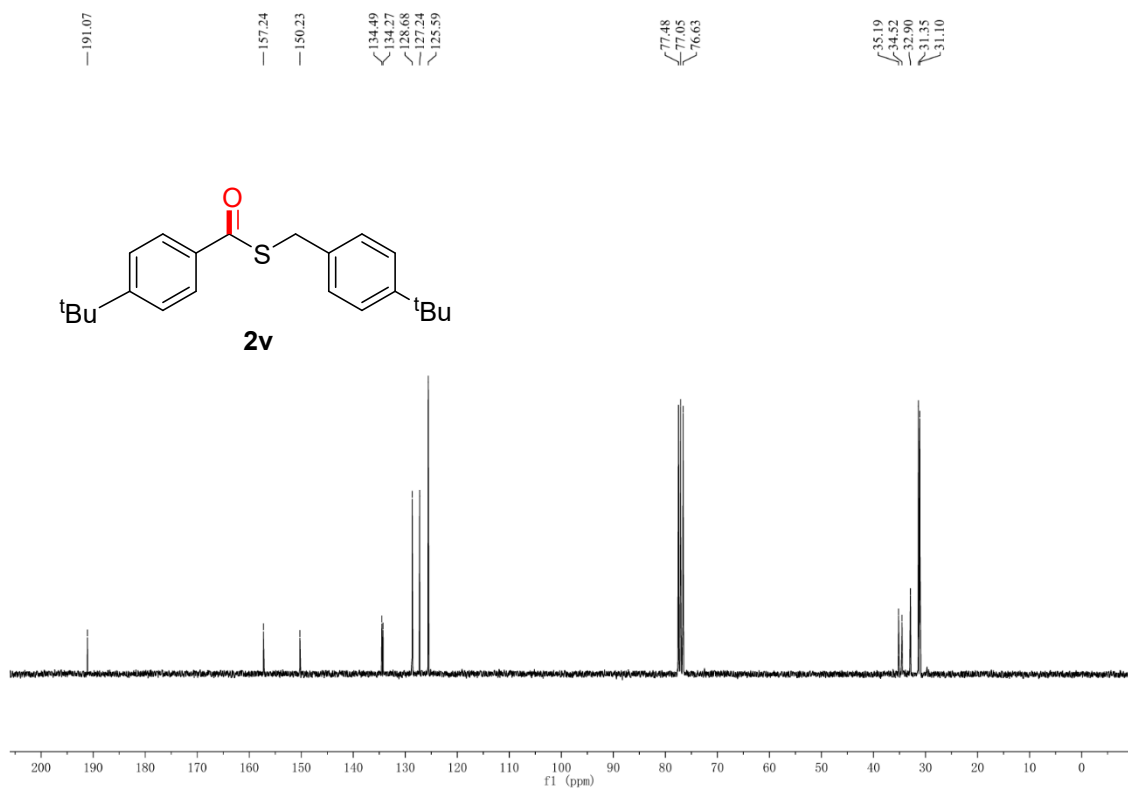

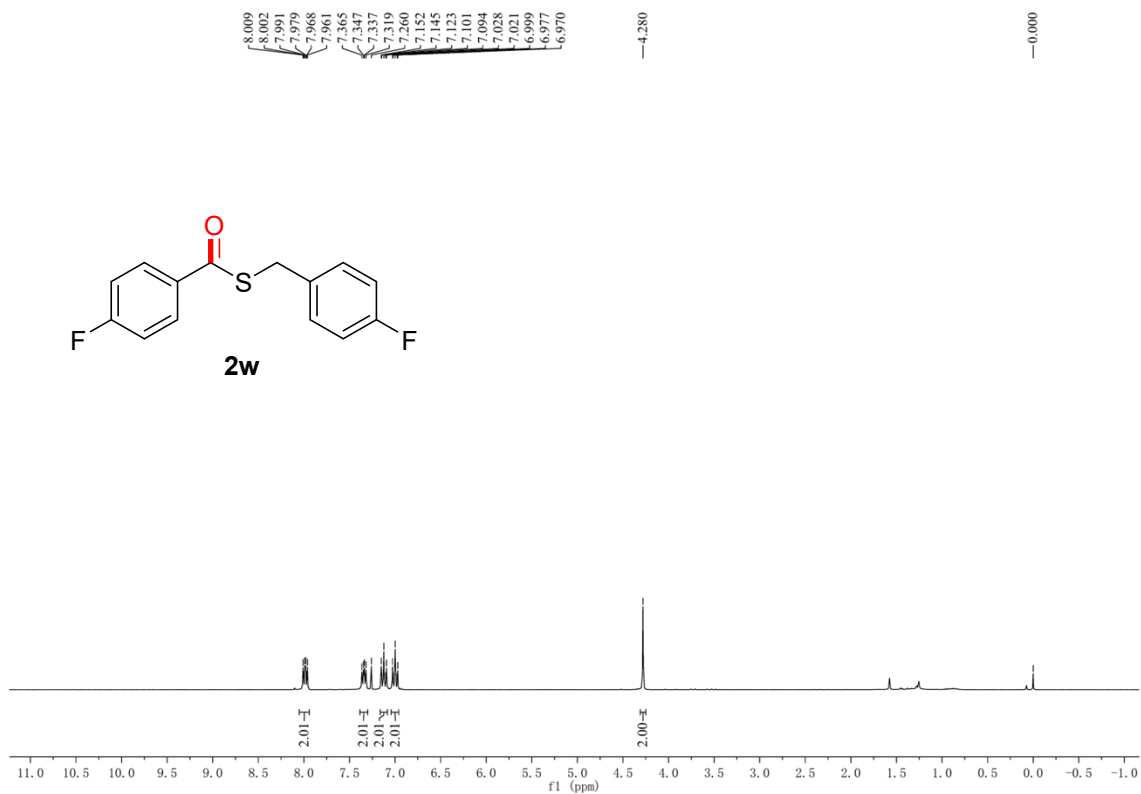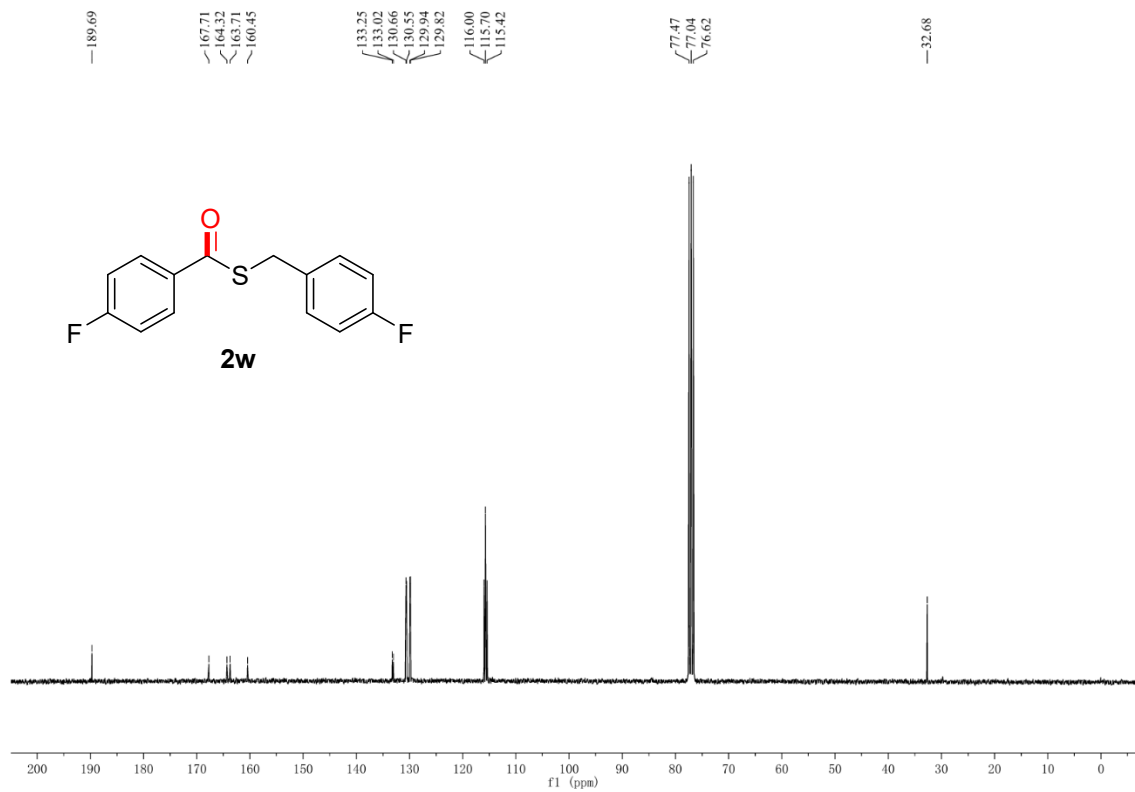

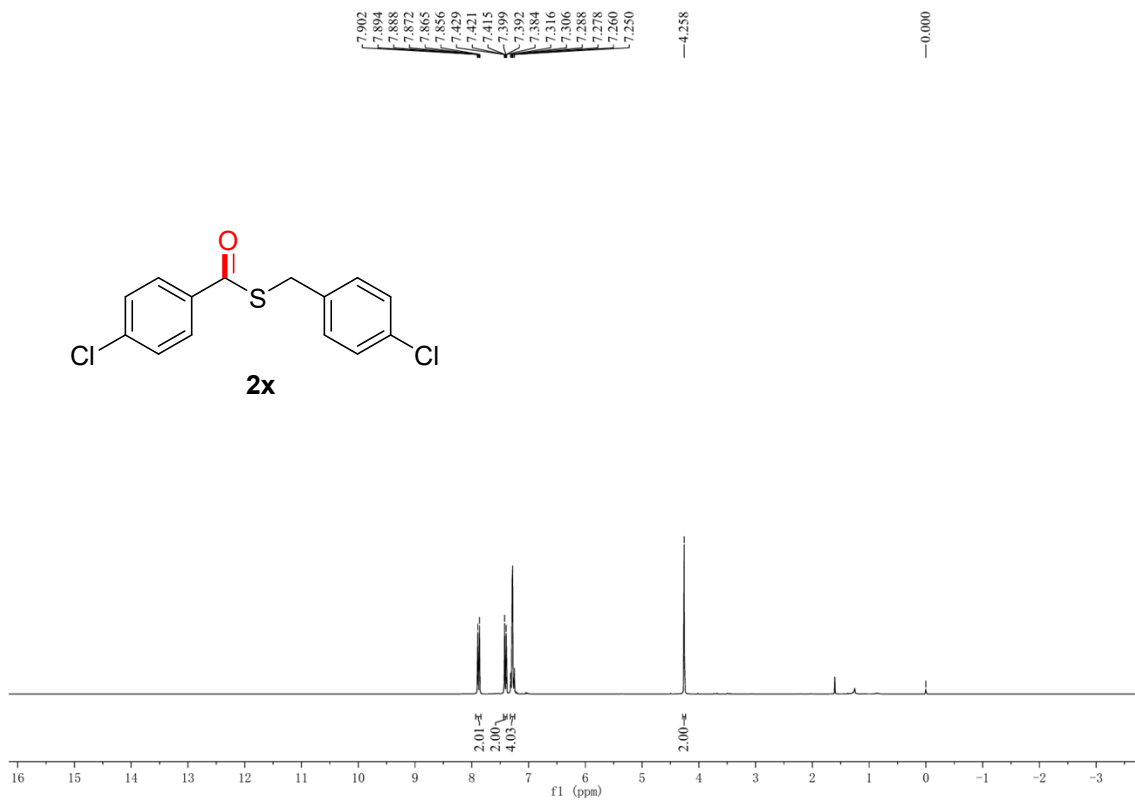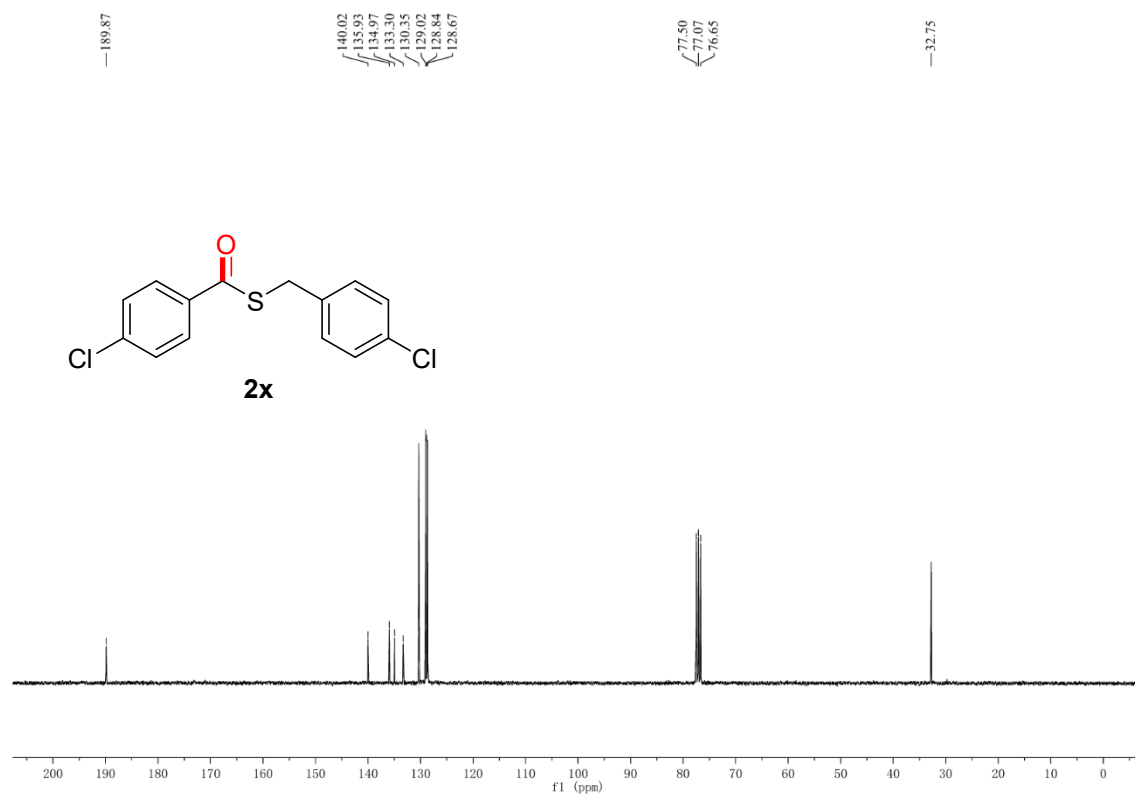

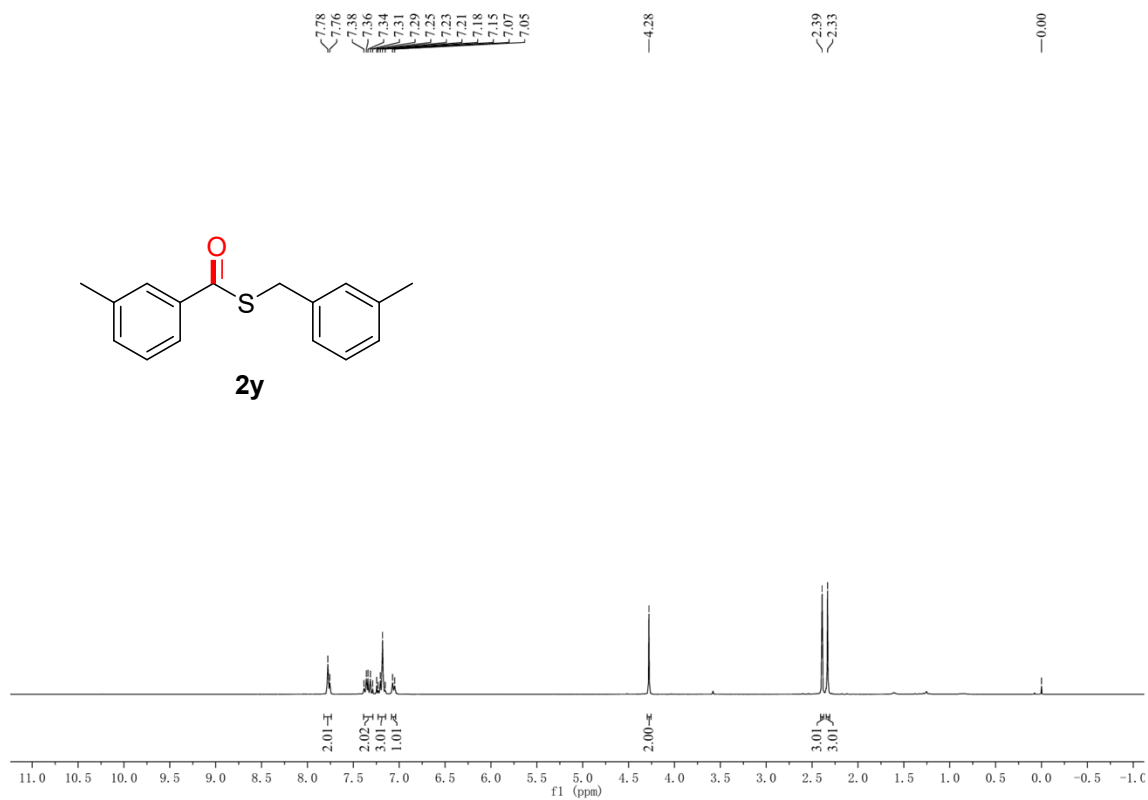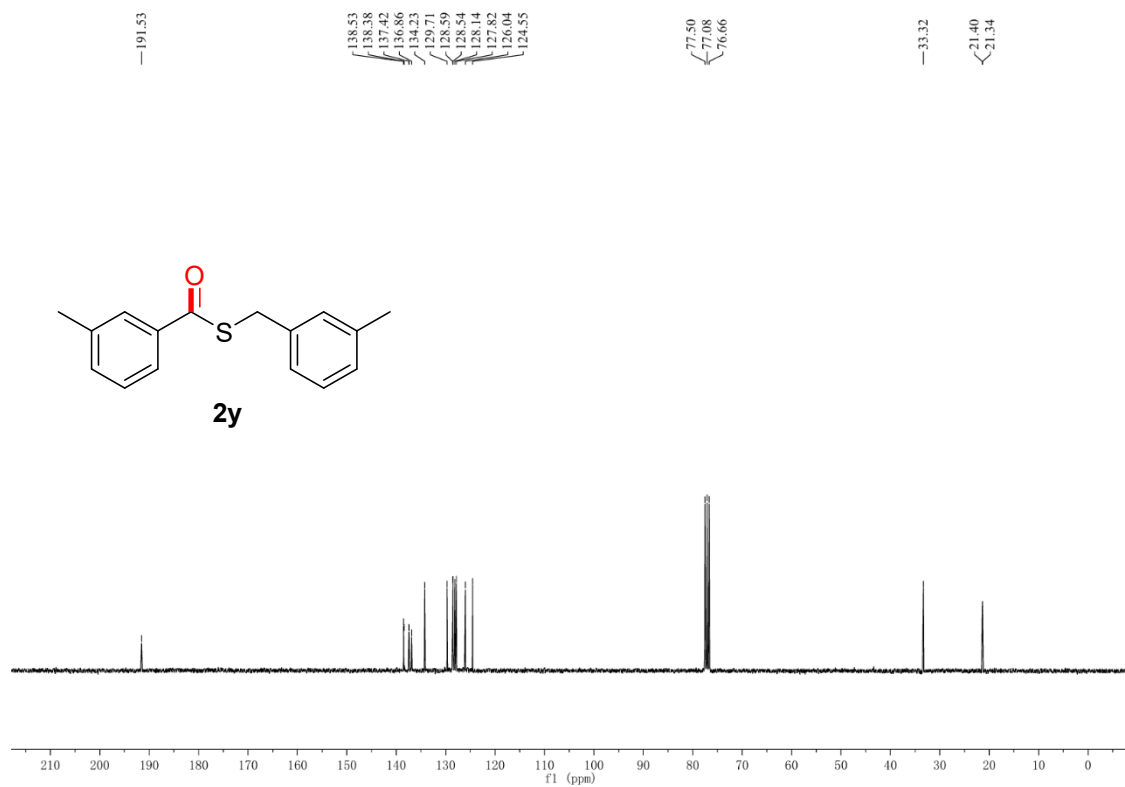

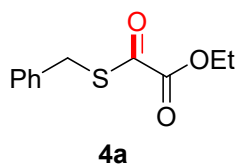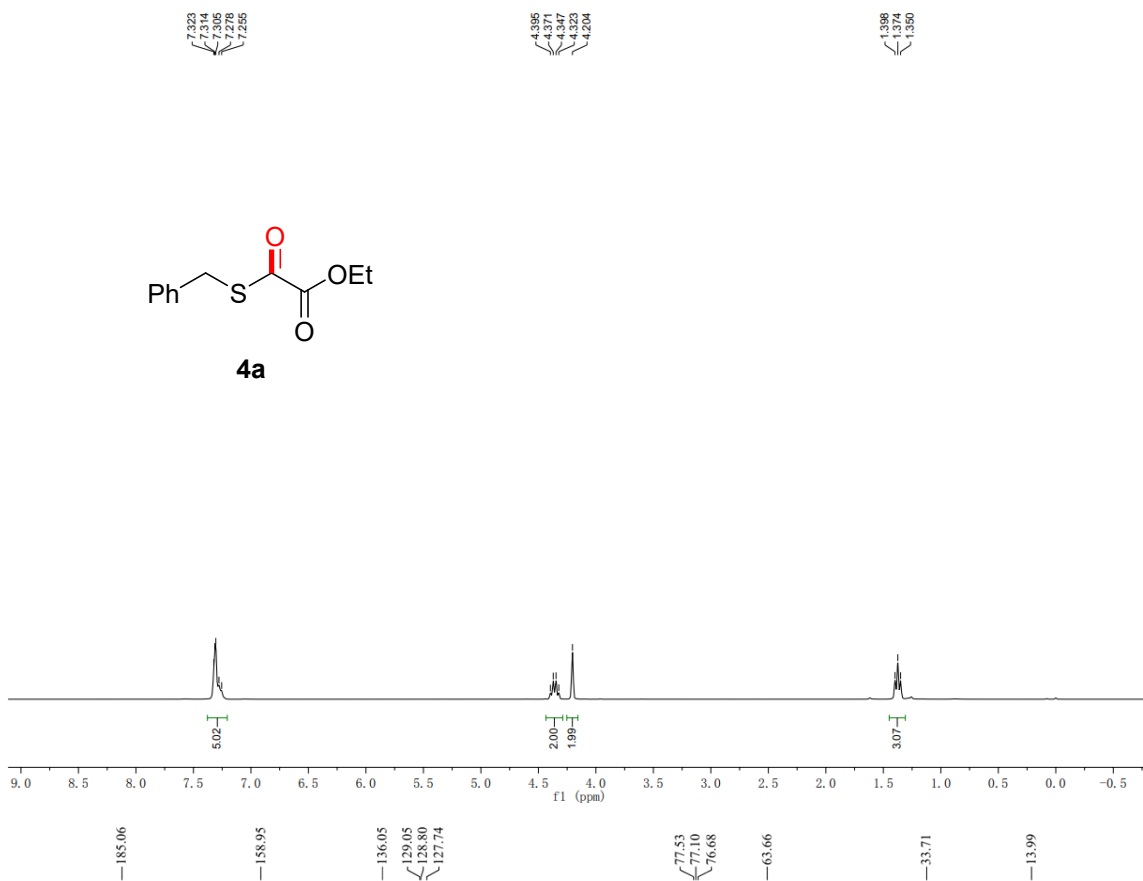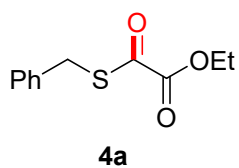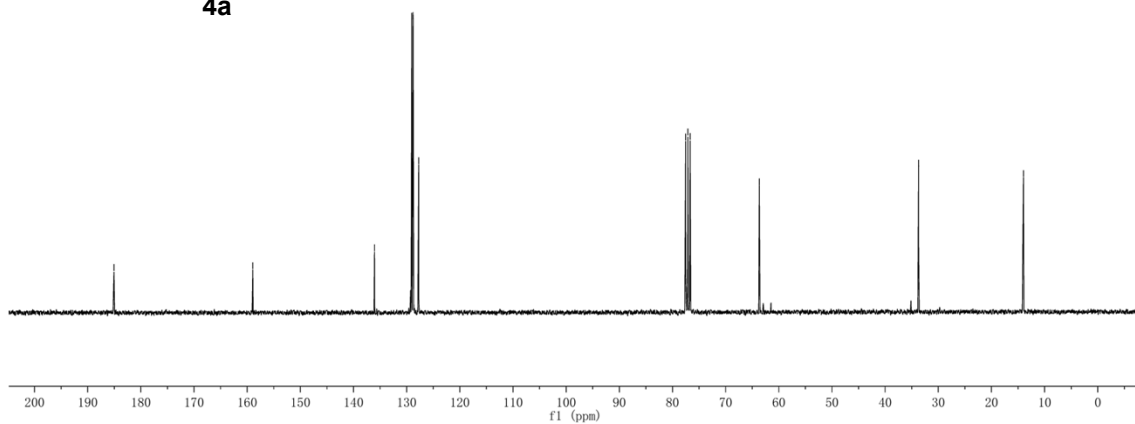

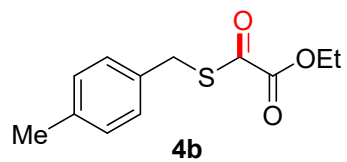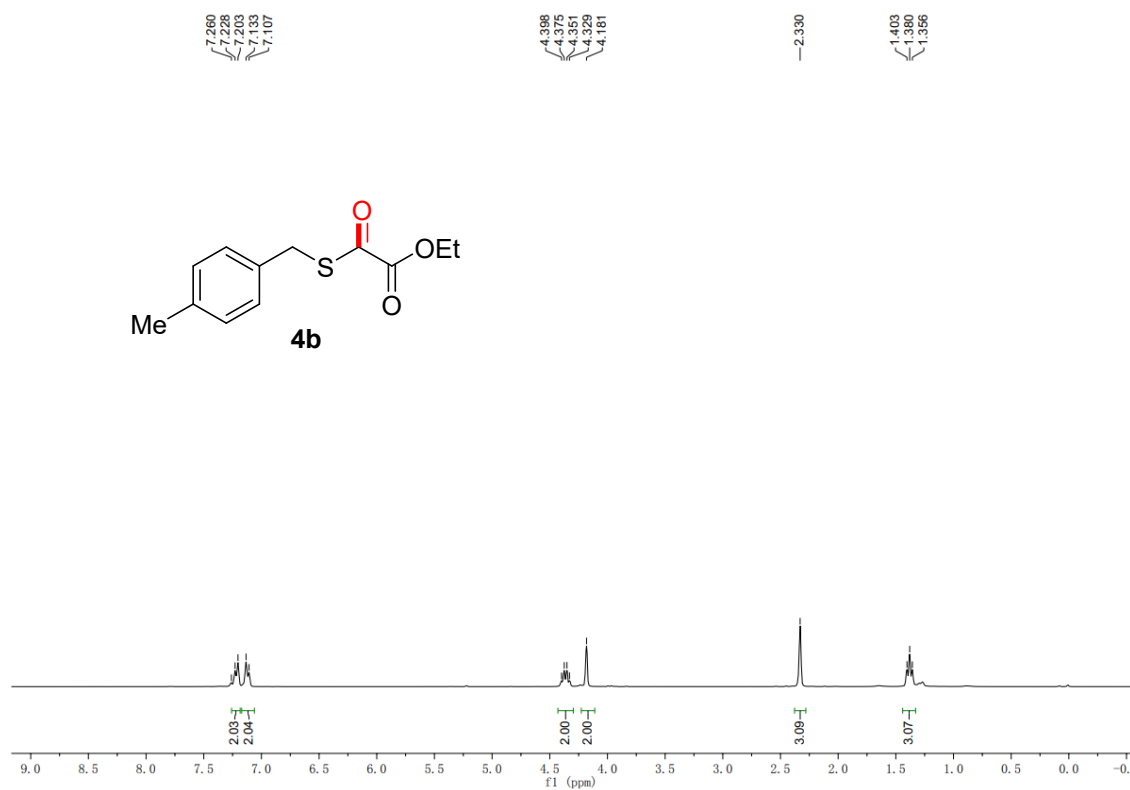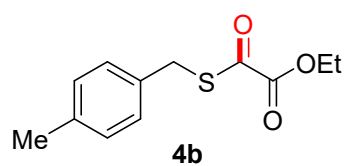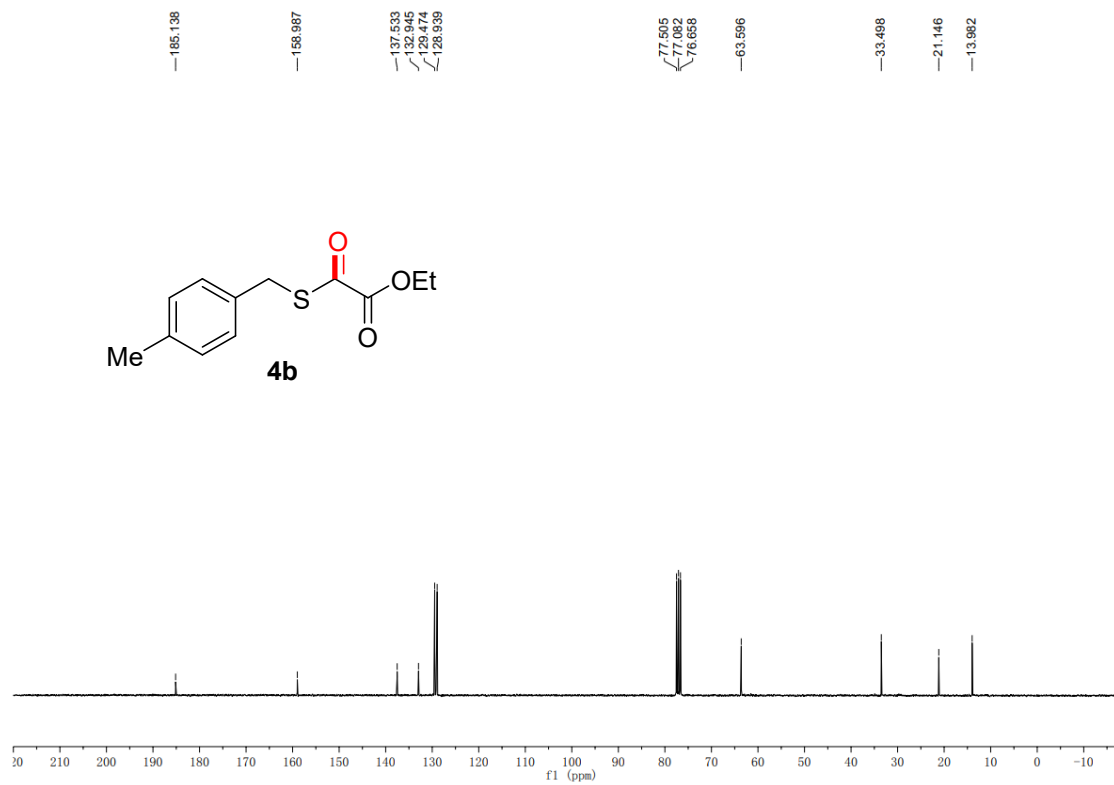

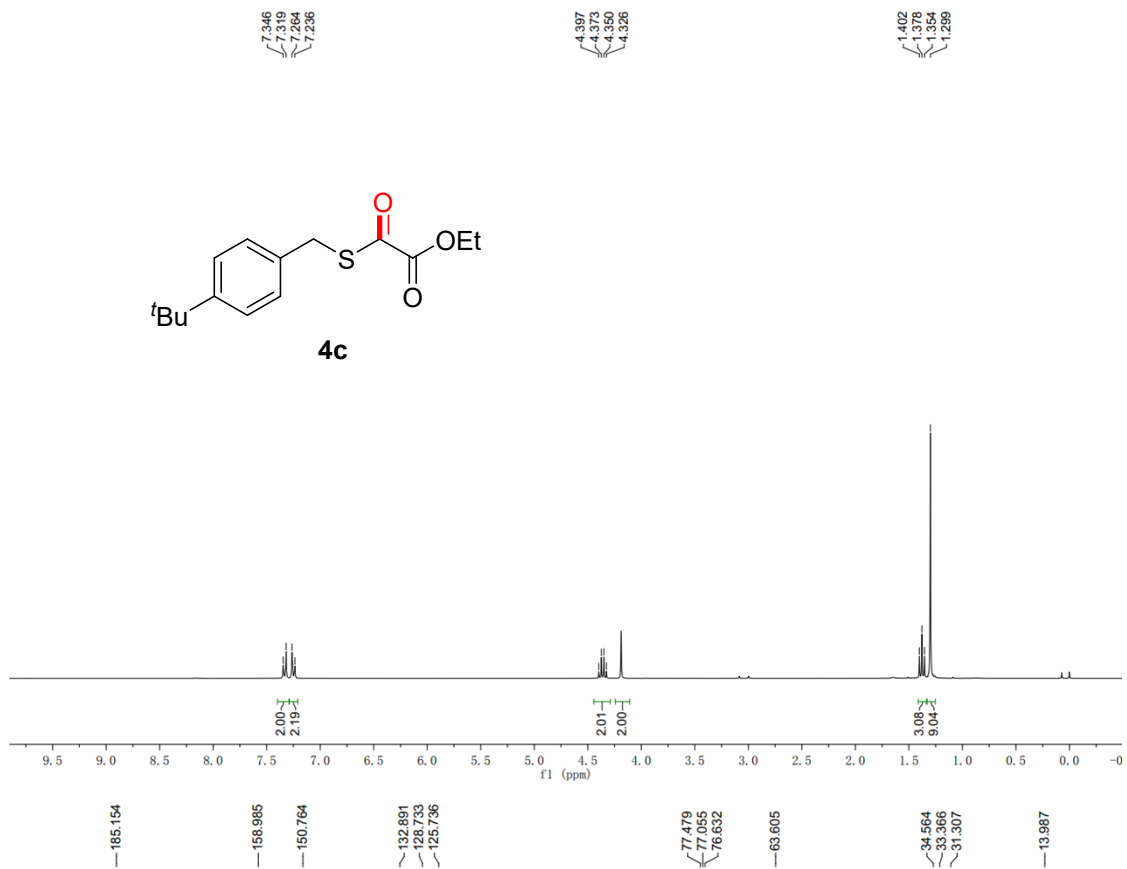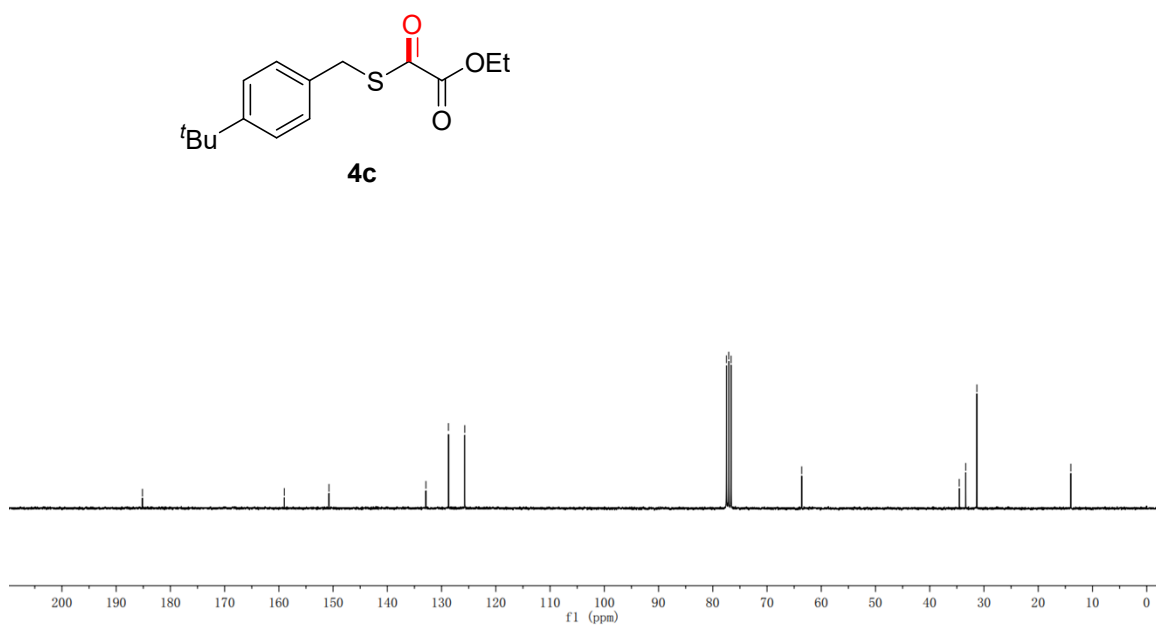



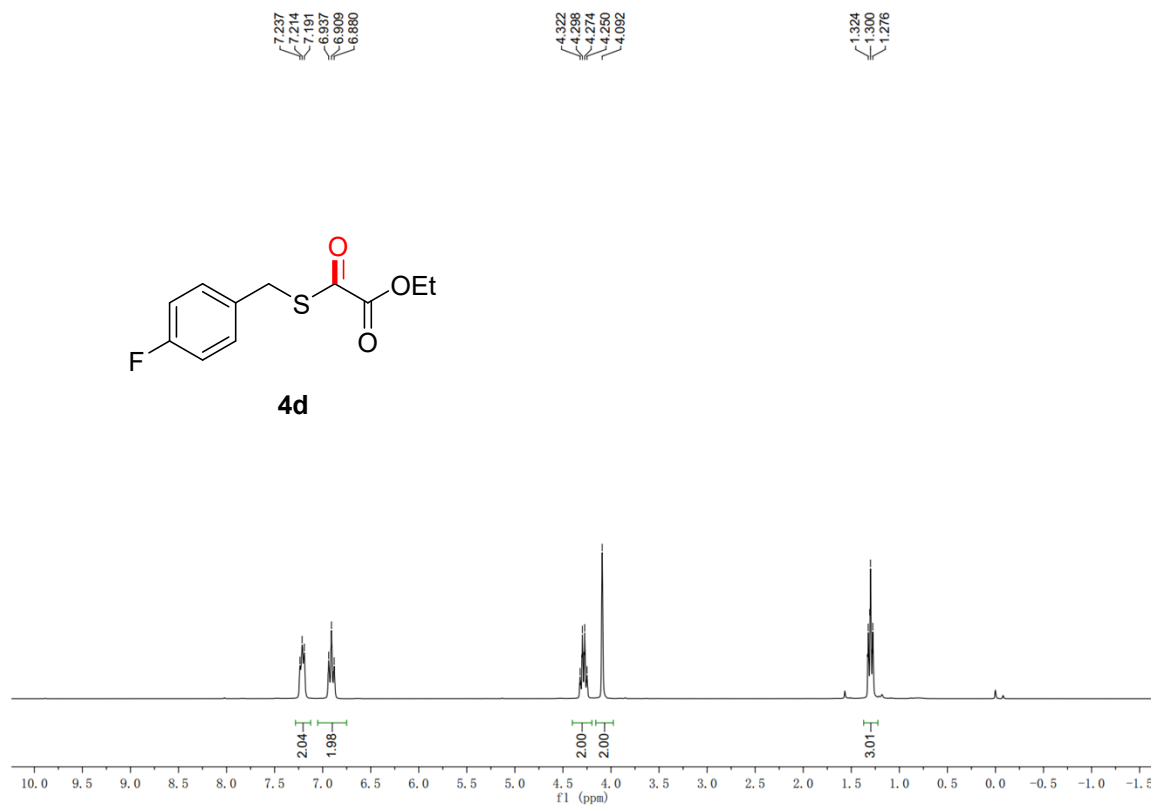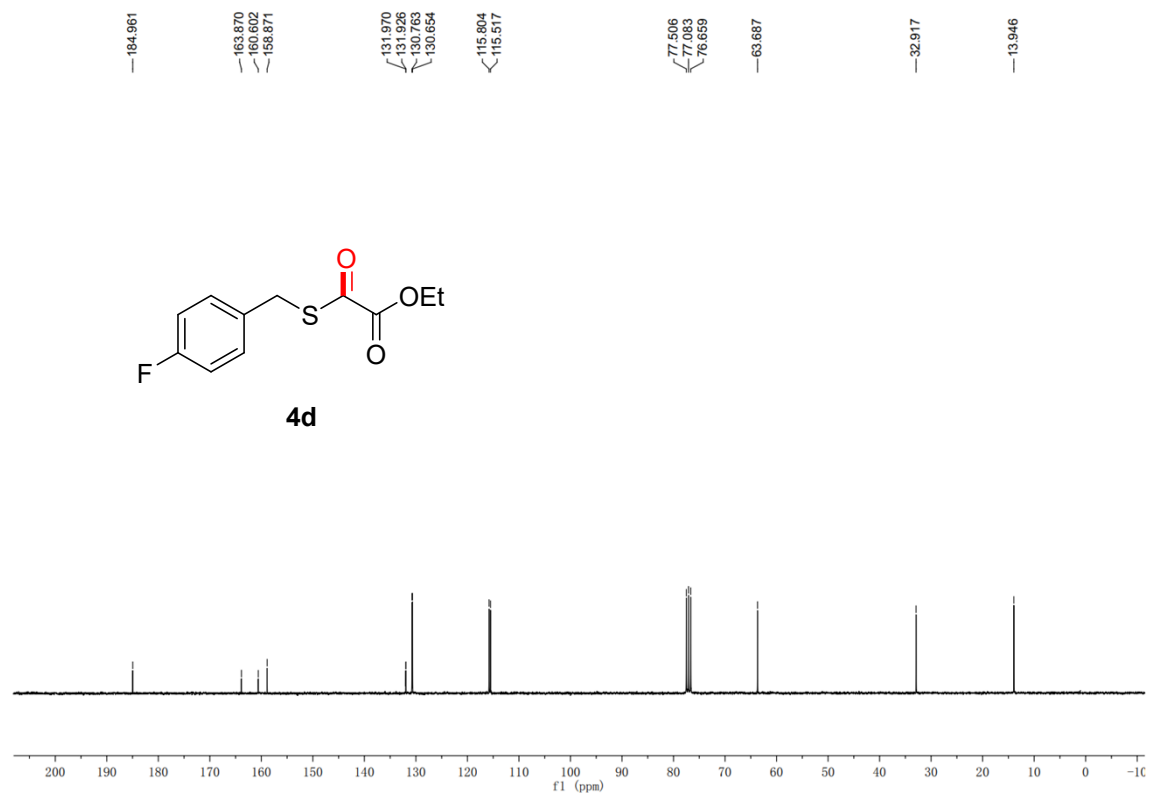

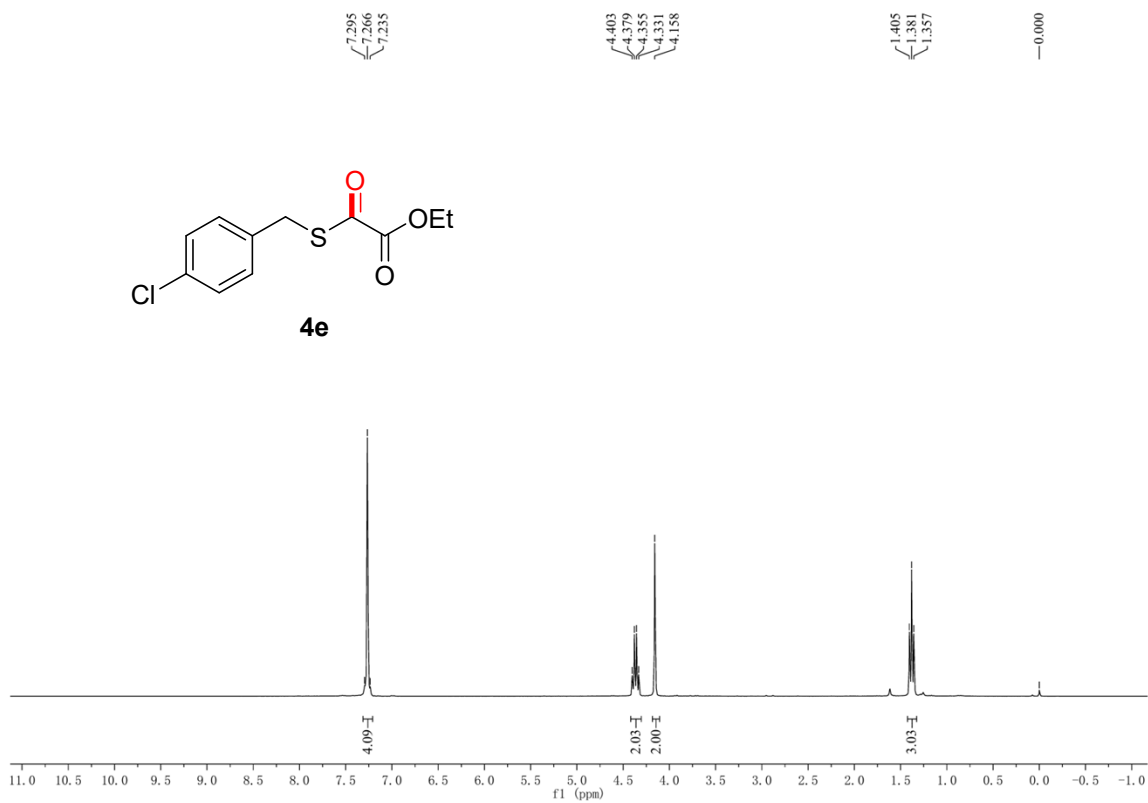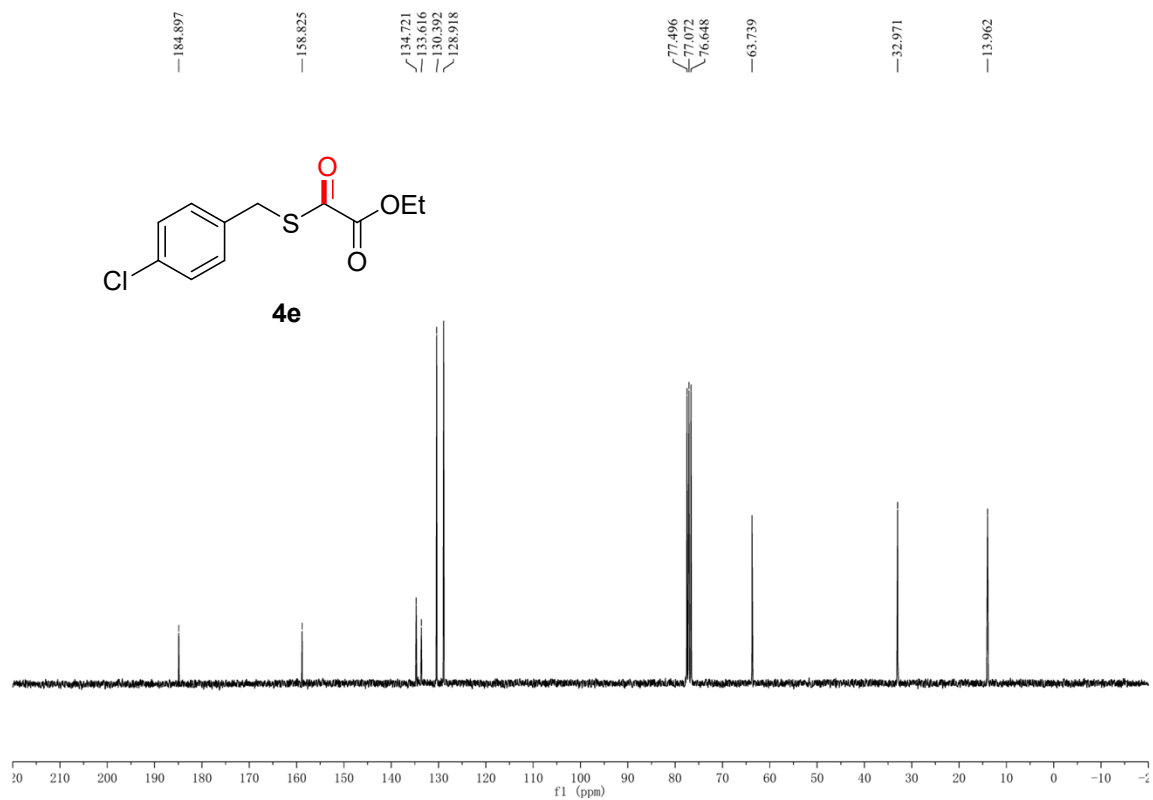

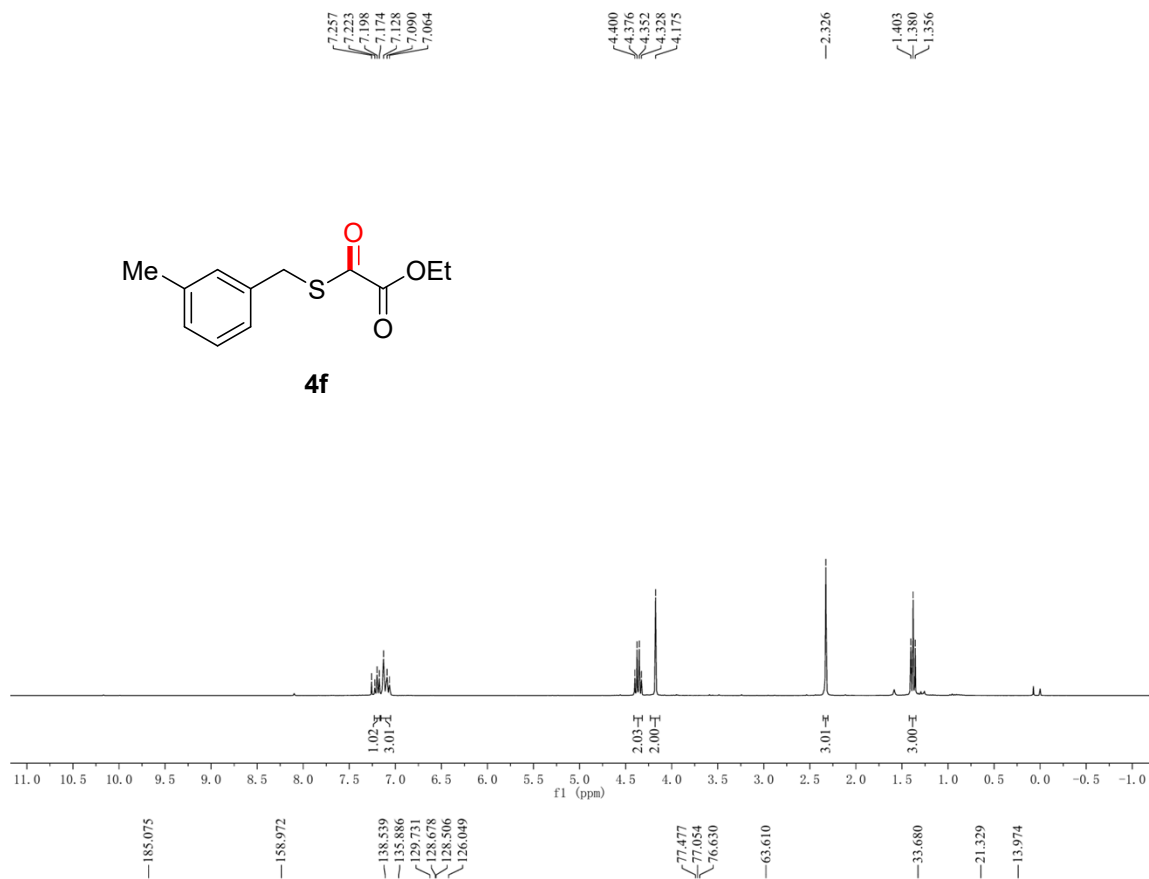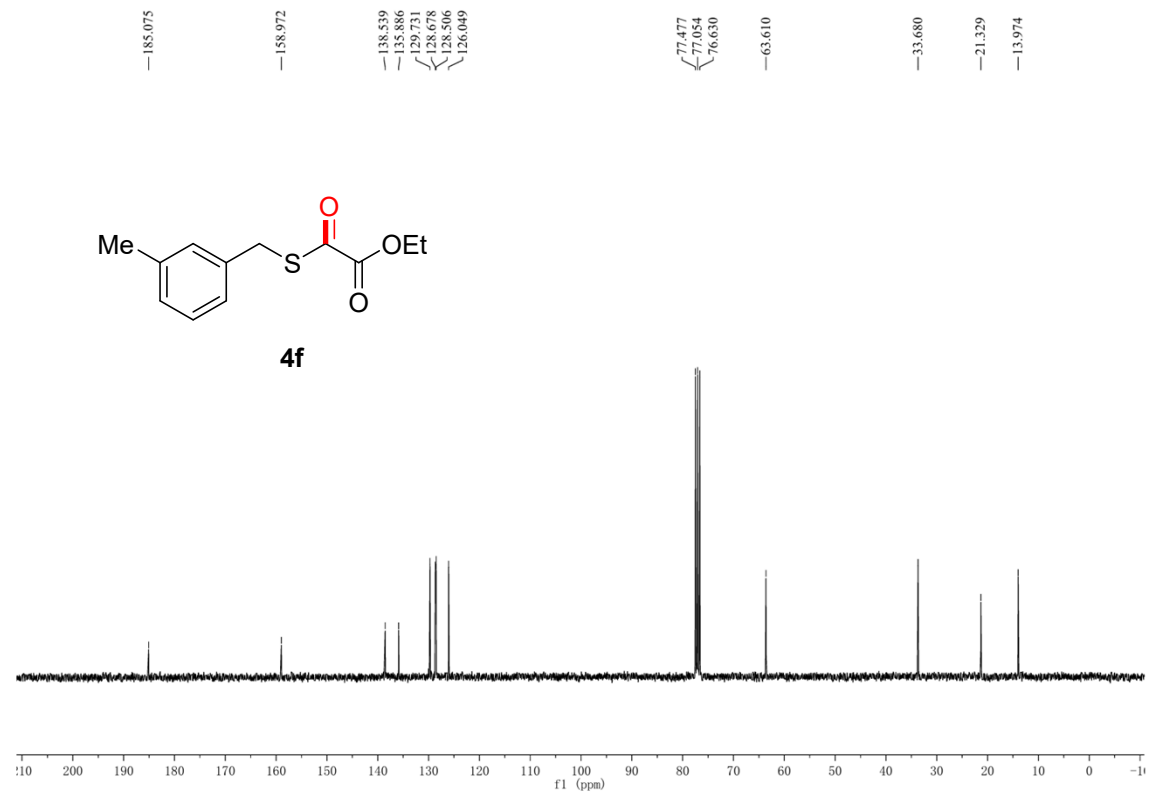

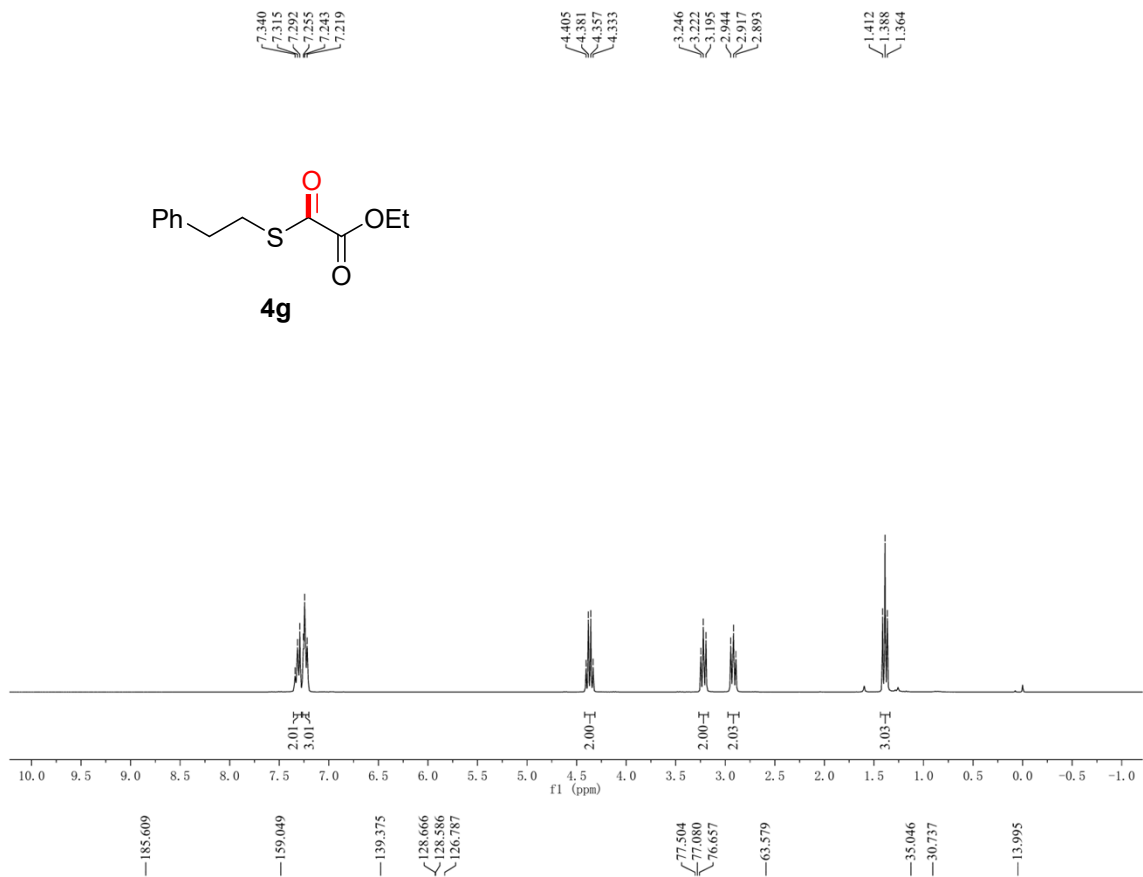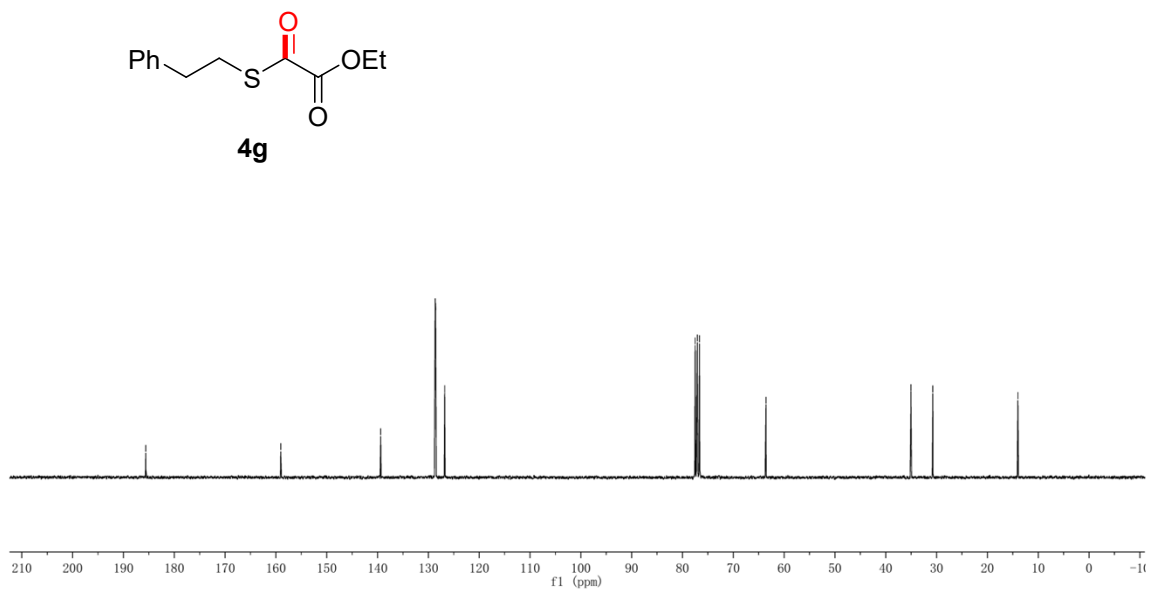

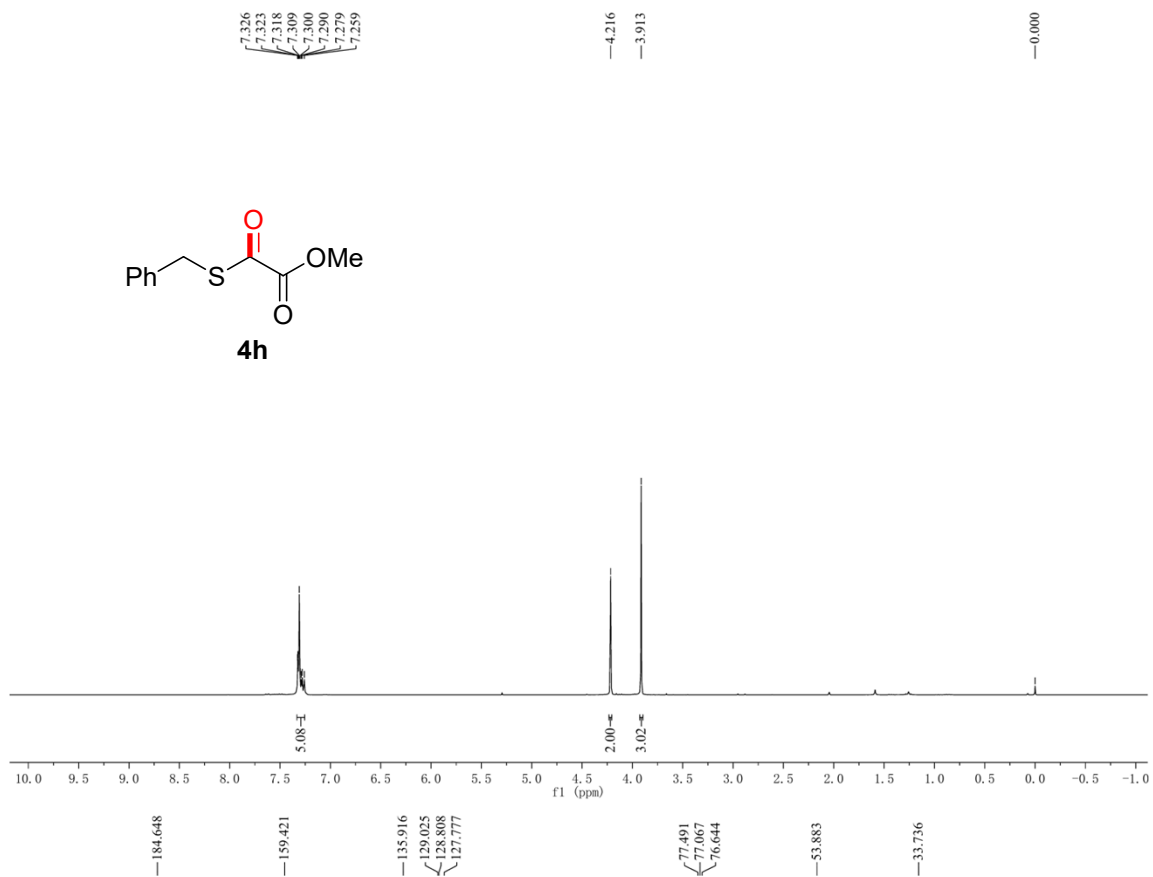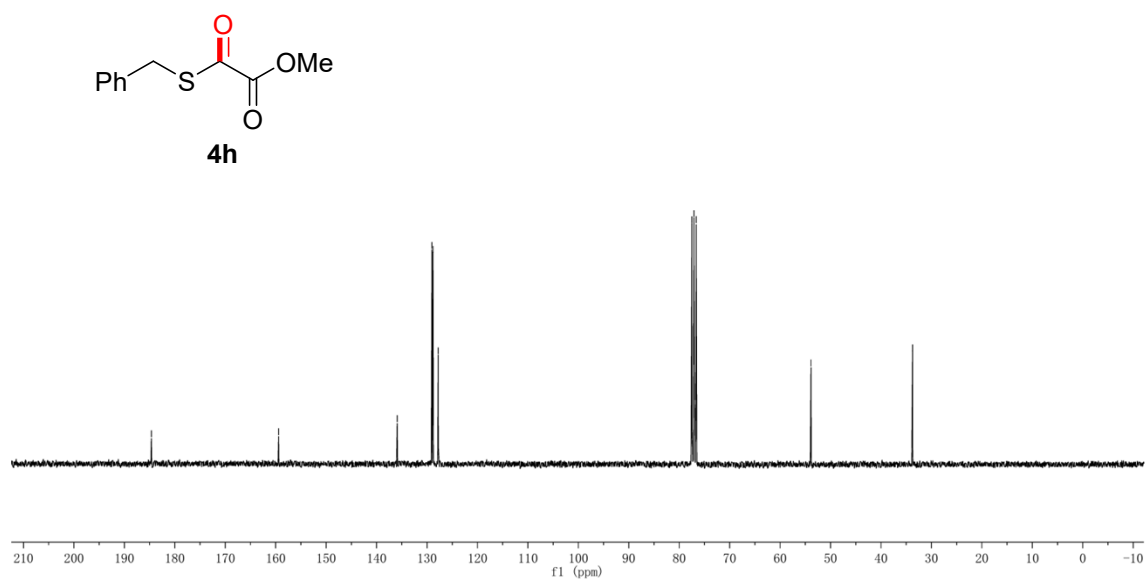

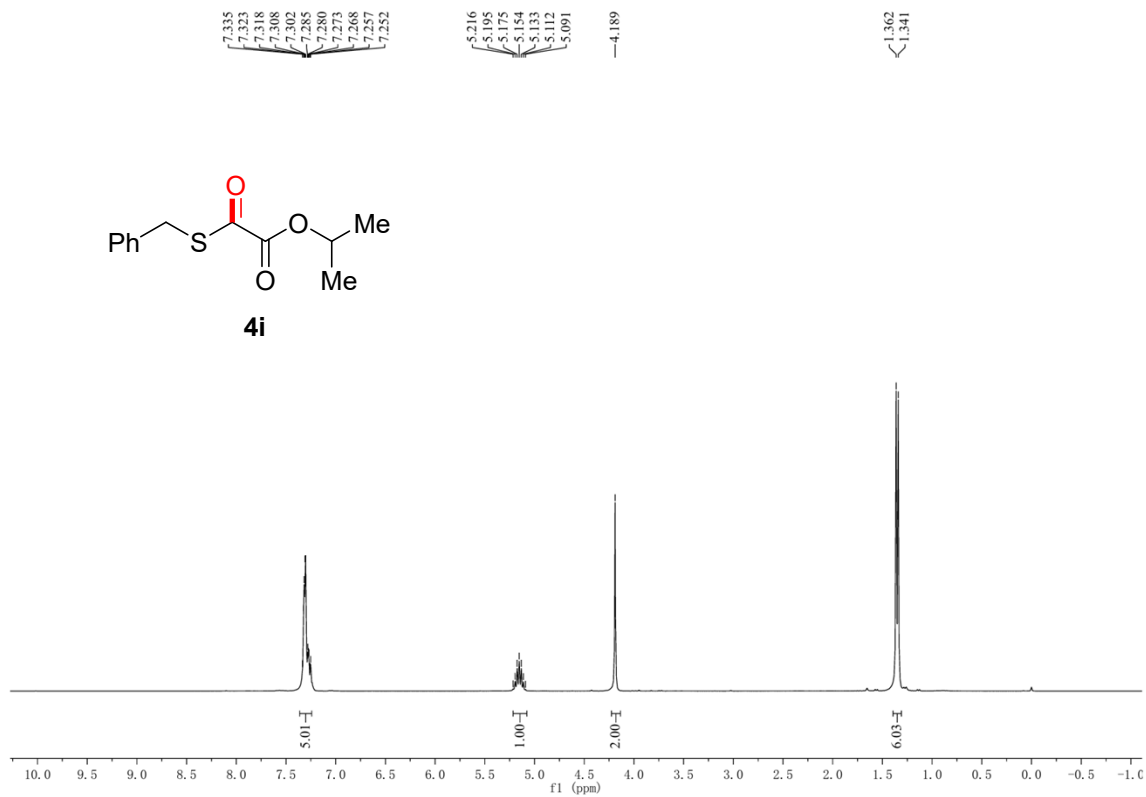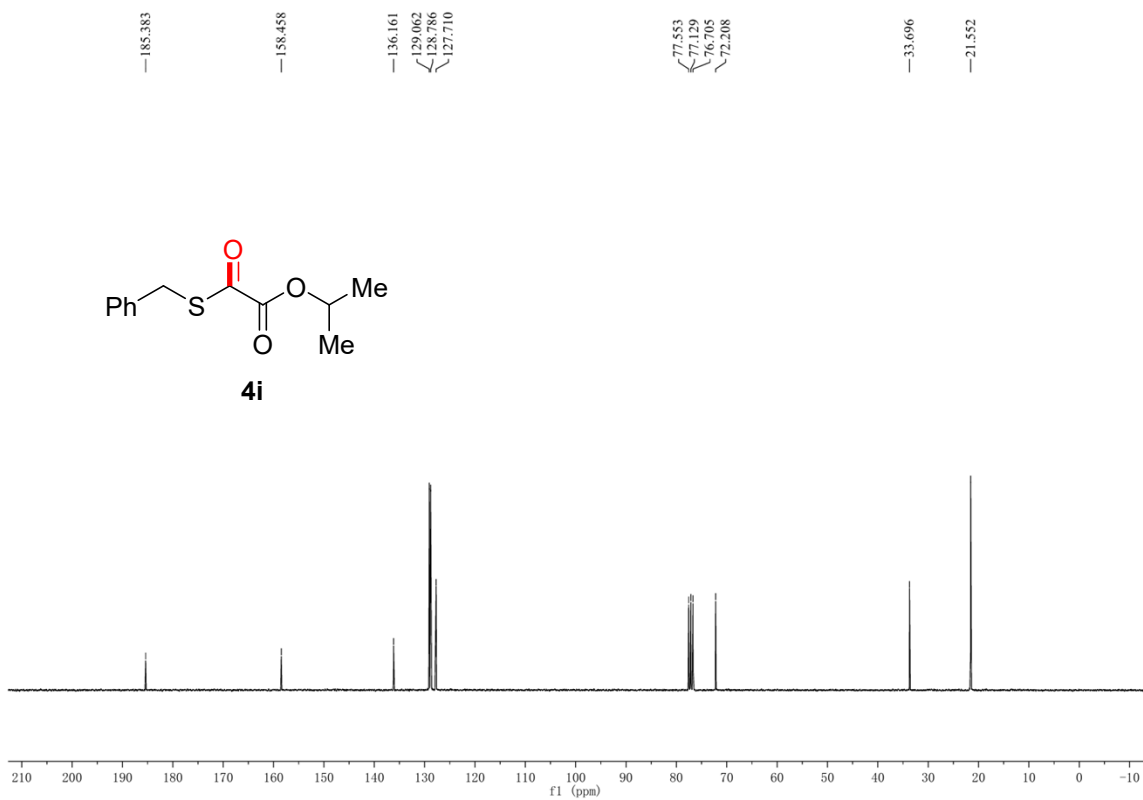

Supplement: d5nj05010c1.pdf [file d5nj05010c1.pdf]
